# Supplementary material
Source: publisher figshare collection journal article supplement (https://gsajournals.figshare.com/ndownloader/files/27379295)
Supplement: Supplementary file 1 [file 27379295]

## Sheet: Table S2
Supplementary Data 2.Information of indels in this study
InDel No	Gene_v4	Gene_Chr	Gene_start	Gene_end	Gene_strand	InDel coordinates in B73	InDel coordinates in Mo17	Lines with insertion (B73 or Mo17)	Distance from InDel to gene TSS	Probes_left flanks_B73	Probes_right flanks_B73	InDel size_total	InDel size_annotated as TE	TE/InDel	InDel type	TE type	eQTL_Gene_v2	eQTL_LOD	eQTL_ADD	eQTL_R2	eQTL_alleles with increasing effect_line	eQTL_allels with increasing effect_InDel	t.test_number of lines with insertion	t.test_number of lines without insertion	t.test_total number of lines	t.test_P value	t.test_significance	t.test_alleles with increasing effect	Direction_whether consistent between eQTL and t.test	PCR ampification in large population	GWAS_F	GWAS_P value
b0000	Zm00001d027458	1	5701680	5704055	-	1:5705150-5705460	1:6380412-6380440	B73	1095	1:5704951-5705150	1:5705460-5705659	310	282	0.909677	TE-InDel	DNA/Helitron	GRMZM2G025552	44.3012	2.7483	0.797468	B73	indel+	4	12	16	0.916986	ns
b0001	Zm00001d027492	1	6524381	6529577	-	1:6531412-6531605	1:7123582-7123673	B73	1835	1:6531213-6531412	1:6531605-6531788	193	134	0.694301	TE-InDel	DNA/PIF-Harbinger	GRMZM5G887276	26.8358	-1.63725	0.575137	MO17	indel-	10	6	16	0.845771	ns
b0002	Zm00001d027502	1	6825834	6829116	+	1:6825476-6825484	1:7306737-7306893	Mo17	358	1:6825306-6825484	1:6825476-6825676	156	155	0.99359	TE-InDel	DNA/Helitron	GRMZM2G092923	47.2148	5.07987	0.781245	B73	indel-	5	8	13	0.970042	ns
b0003	Zm00001d027520	1	7356309	7358599	+	1:7354635-7354749	1:7838634-7838643	B73	1560	1:7354436-7354635	1:7354749-7354925	114	113	0.991228	TE-InDel	DNA/Helitron	GRMZM2G095968	43.9833	1.44365	0.726046	B73	indel+	3	13	16	0.021586	significant	indel+	consistent
b0004	Zm00001d027520	1	7356309	7358599	+	1:7355285-7355411	1:7839224-7839228	B73	898	1:7355104-7355285	1:7355411-7355612	126	124	0.984127	TE-InDel	DNA	GRMZM2G095968	43.9833	1.44365	0.726046	B73	indel+	5	11	16	0.0245104	significant	indel+	consistent
b0005	Zm00001d027548	1	8046302	8047417	+	1:8041452-8041619	1:8619981-8619989	B73	4683	1:8041243-8041452	1:8041619-8041818	167	166	0.994012	TE-InDel	DNA/hAT	GRMZM2G075701	40.4242	7.86413	0.741292	B73	indel+	6	10	16	0.795862	ns
b0006	Zm00001d027548	1	8046302	8047417	+	1:8044531-8044636	1:8621425-8621435	B73	1666	1:8044338-8044531	1:8044636-8044837	105	104	0.990476	TE-InDel	DNA/PIF-Harbinger	GRMZM2G075701	40.4242	7.86413	0.741292	B73	indel+	6	10	16	0.426541	ns
b0007	Zm00001d027656	1	10261506	10265855	+	1:10260893-10261432	1:11389385-11389388	B73	74	1:10260694-10260893	1:10261432-10261631	539	536	0.994434	TE-InDel	DNA/hAT	GRMZM2G339563	36.8784	-1.22218	0.80176	MO17	indel-	7	9	16	0.101503	ns
b0008	Zm00001d027708	1	11664783	11666908	-	1:11670461-11670599	1:12724223-12724233	B73	3553	1:11670262-11670461	1:11670599-11670796	138	132	0.956522	TE-InDel	DNA	GRMZM2G086163	23.445	-0.486612	0.642447	MO17	indel-	6	10	16	0.658985	ns
b0009	Zm00001d027721	1	12140948	12146615	-	1:12147654-12147661	1:13151231-13151998	Mo17	1046	1:12147477-12147661	1:12147654-12147846	767	737	0.960887	TE-InDel	DNA/hAT	GRMZM2G141636	33.4341	2.55451	0.73216	B73	indel-	3	6	9	0.73946	ns
b0010	Zm00001d027721	1	12140948	12146615	-	1:12147896-12147904	1:13152242-13152485	Mo17	1289	1:12147700-12147904	1:12147896-12148096	243	231	0.950617	TE-InDel	DNA/MuDR	GRMZM2G141636	33.4341	2.55451	0.73216	B73	indel-	4	8	12	0.492708	ns
b0011	Zm00001d027767	1	13143086	13145452	+	1:13142001-13142321	1:14355782-14355784	B73	765	1:13141802-13142001	1:13142321-13142521	320	319	0.996875	TE-InDel	DNA/PIF-Harbinger	GRMZM2G031718	27.962	-0.760027	0.633608	MO17	indel-	4	12	16	0.472036	ns
b0012	Zm00001d027805	1	13965284	13968673	+	1:13963051-13963053	1:15238354-15238661	Mo17	2233	1:13962853-13963053	1:13963051-13963197	307	305	0.993485	TE-InDel	DNA/PIF-Harbinger	GRMZM2G407396	31.3284	1.54276	0.508511	B73	indel-	7	8	15	0.402008	ns
b0015	Zm00001d027805	1	13965284	13968673	+	1:13964807-13965214	1:15239986-15239993	B73	70	1:13964626-13964807	1:13965214-13965414	407	406	0.997543	TE-InDel	DNA/hAT	GRMZM2G407396	31.3284	1.54276	0.508511	B73	indel+	5	11	16	0.0265465	significant	indel-	inconsistent
b0016	Zm00001d027845	1	15013950	15018699	+	1:15012251-15012389	1:16243065-16243069	B73	1561	1:15012048-15012251	1:15012389-15012588	138	137	0.992754	TE-InDel	DNA	GRMZM2G162725	36.7706	1.72654	0.714425	B73	indel+	7	9	16	0.634197	ns
b0017	Zm00001d027876	1	16227533	16235054	+	1:16225664-16225668	1:17763363-17763586	Mo17	1869	1:16225471-16225668	1:16225664-16225865	223	223	1	TE-InDel	DNA/MuDR	GRMZM2G156486	72.1333	-3.72396	0.906125	MO17	indel+	2	13	15	0.0295175	significant	indel+	consistent
b0019	Zm00001d027877	1	16284218	16285168	-	1:16286940-16286956	1:17815937-17816476	Mo17	1788	1:16286756-16286956	1:16286940-16287140	539	537	0.996289	TE-InDel	DNA/hAT	GRMZM2G178852	48.4217	2.4898	0.759895	B73	indel-	0	14	14
b0020	Zm00001d027887	1	16744340	16746866	-	1:16748092-16748221	1:18293373-18293375	B73	1226	1:16747908-16748092	1:16748221-16748417	129	129	1	TE-InDel	DNA/PIF-Harbinger	GRMZM2G080524	22.9071	0.167416	0.496724	B73	indel+	9	7	16	0.00835842	significant	indel-	inconsistent
b0021	Zm00001d027957	1	18299864	18321135	-	1:18321270-18321272	1:19772274-19778178	Mo17	137	1:18321070-18321272	1:18321270-18321463	5904	5903	0.999831	TE-InDel	DNA/PIF-Harbinger	GRMZM2G059102	45.8818	8.9306	0.74603	B73	indel-	1	15	16
b0022	Zm00001d028040	1	21293997	21296983	-	1:21297090-21297253	1:22250227-22250228	B73	107	1:21296891-21297090	1:21297253-21297454	163	145	0.889571	TE-InDel	DNA/Helitron	GRMZM2G111214	53.8696	2.95642	0.889757	B73	indel+	7	9	16	0.100204	ns
b0023	Zm00001d028071	1	21979236	21982123	+	1:21977809-21977988	1:22927149-22927153	B73	1248	1:21977610-21977809	1:21977988-21978189	179	179	1	TE-InDel	DNA/PIF-Harbinger	GRMZM2G114234	26.6879	0.79231	0.697475	B73	indel+	5	11	16	0.817974	ns
b0024	Zm00001d028088	1	22599568	22606524	+	1:22597075-22597594	1:23448289-23448291	B73	1974	1:22596876-22597075	1:22597594-22597794	519	519	1	TE-InDel	DNA/hAT	GRMZM5G880508	41.1481	1.55413	0.736766	B73	indel+	9	7	16	0.945452	ns
b0025	Zm00001d028139	1	23959615	23962773	-	1:23963490-23963494	1:24936830-24938266	Mo17	721	1:23963294-23963494	1:23963490-23963690	1436	1436	1	TE-InDel	LTR/Copia	GRMZM2G171073	36.9252	1.1821	0.7137	B73	indel-	3	8	11	0.30668	ns
b0026	Zm00001d028160	1	24589853	24593712	-	1:24593833-24593836	1:25479060-25479239	Mo17	124	1:24593634-24593836	1:24593833-24594008	179	179	1	TE-InDel	DNA/PIF-Harbinger	GRMZM2G139852	33.3691	4.94243	0.566368	B73	indel-	1	15	16
b0027	Zm00001d028160	1	24589853	24593712	-	1:24594008-24595481	1:25479413-25479420	B73	296	1:24593833-24594008	1:24595481-24595678	1473	843	0.572301	TE-InDel	DNA/TcMar-Stowaway	GRMZM2G139852	33.3691	4.94243	0.566368	B73	indel+	13	3	16	0.276705	ns
b0028	Zm00001d028187	1	25755280	25759748	+	1:25753605-25753607	1:26759787-26762564	Mo17	1675	1:25753409-25753607	1:25753605-25753805	2777	2772	0.998199	TE-InDel	DNA/PIF-Harbinger	GRMZM2G107815	30.1377	2.15903	0.642389	B73	indel-	5	7	12	0.12904	ns
b0029	Zm00001d028187	1	25755280	25759748	+	1:25754957-25755184	1:26763914-26763914	B73	96	1:25754758-25754957	1:25755184-25755374	227	225	0.991189	TE-InDel	DNA/MuDR	GRMZM2G107815	30.1377	2.15903	0.642389	B73	indel+	5	11	16	0.00434671	significant	indel-	inconsistent
b0030	Zm00001d028218	1	26887363	26899704	-	1:26904204-26904213	1:27851112-27851420	Mo17	4509	1:26904020-26904213	1:26904204-26904388	308	307	0.996753	TE-InDel	DNA/PIF-Harbinger	GRMZM2G099628	22.4244	2.20938	0.550154	B73	indel-	5	8	13	0.302349	ns
b0031	Zm00001d028304	1	29830012	29832203	-	1:29832471-29836922	1:31192116-31192116	B73	268	1:29832272-29832471	1:29836922-29837123	4451	2423	0.544372	TE-InDel	DNA/Helitron	GRMZM2G126808	30.8538	0.8652	0.592408	B73	indel+	10	6	16	0.175577	ns
b0032	Zm00001d028392	1	33147676	33150346	-	1:33150706-33150726	1:34954243-34954386	Mo17	380	1:33150529-33150726	1:33150706-33150890	143	110	0.769231	TE-InDel	DNA/Helitron	GRMZM2G077942	29.0673	10.4987	0.673245	B73	indel-	0	11	11
b0033	Zm00001d028398	1	33451482	33454805	+	1:33448937-33448939	1:35095697-35096251	Mo17	2543	1:33448734-33448937	1:33448939-33449141	554	485	0.875451	TE-InDel	DNA/hAT	GRMZM2G108032	50.3877	12.4013	0.76978	B73	indel-	3	8	11	0.0497185	significant	indel-	consistent
b0034	Zm00001d028400	1	33597142	33600523	+	1:33594102-33594485	1:35140758-35140765	B73	2657	1:33593903-33594102	1:33594485-33594685	383	352	0.91906	TE-InDel	DNA/hAT	GRMZM2G159110	36.3662	4.36788	0.703148	B73	indel+	10	6	16	0.401509	ns
b0035	Zm00001d028400	1	33597142	33600523	+	1:33594857-33594860	1:35141133-35141475	Mo17	2285	1:33594661-33594860	1:33594857-33595057	342	283	0.827485	TE-InDel	DNA/PIF-Harbinger	GRMZM2G159110	36.3662	4.36788	0.703148	B73	indel-	1	15	16
b0036	Zm00001d028400	1	33597142	33600523	+	1:33596188-33596204	1:35142795-35143158	Mo17	938	1:33595989-33596188	1:33596204-33596393	363	361	0.99449	TE-InDel	Simple_repeat	GRMZM2G159110	36.3662	4.36788	0.703148	B73	indel-	1	13	14
b0037	Zm00001d028570	1	39410431	39417092	-	1:39417280-39417363	1:40451417-40451951	Mo17	188	1:39417081-39417280	1:39417363-39417536	534	460	0.861423	TE-InDel	DNA	GRMZM2G160428	33.3272	1.87731	0.750867	B73	indel-	7	7	14	0.252912	ns
b0038	Zm00001d028570	1	39410431	39417092	-	1:39417527-39417536	1:40452146-40453173	Mo17	444	1:39417363-39417536	1:39417527-39417736	1027	1027	1	TE-InDel	DNA/Helitron	GRMZM2G160428	33.3272	1.87731	0.750867	B73	indel-	0	11	11
b0040	Zm00001d028593	1	40162847	40168804	+	1:40161899-40161904	1:41343895-41345221	Mo17	948	1:40161708-40161904	1:40161899-40162090	1326	1270	0.957768	TE-InDel	LTR/Gypsy	GRMZM2G337425	48.23	2.01072	0.856452	B73	indel-	1	11	12
b0041	Zm00001d028642	1	41591107	41596895	-	1:41597707-41597708	1:43055749-43056620	Mo17	812	1:41597508-41597707	1:41597708-41597908	871	580	0.665901	TE-InDel	DNA/PIF-Harbinger	GRMZM2G096231	37.8528	1.98256	0.687091	B73	indel-	6	5	11	0.799012	ns
b0042	Zm00001d028695	1	43355977	43359324	+	1:43352843-43352878	1:44894959-44895399	Mo17	3099	1:43352644-43352843	1:43352878-43353073	440	412	0.936364	TE-InDel	DNA/PIF-Harbinger	GRMZM2G042032	23.5233	2.81689	0.522295	B73	indel-	1	9	10
b0043	Zm00001d028696	1	43359353	43361346	-	1:43361475-43362335	1:44904744-44904748	B73	129	1:43361276-43361475	1:43362335-43362535	860	756	0.87907	TE-InDel	DNA/PIF-Harbinger	GRMZM2G338037	30.9017	1.47797	0.658689	B73	indel+	7	9	16	0.173389	ns
b0044	Zm00001d028705	1	43725600	43726910	+	1:43723987-43724124	1:45200441-45200453	B73	1476	1:43723790-43723987	1:43724124-43724229	137	119	0.868613	TE-InDel	DNA/PIF-Harbinger	GRMZM2G052581	41.733	2.43873	0.79541	B73	indel+	3	13	16	0.487283	ns
b0045	Zm00001d028705	1	43725600	43726910	+	1:43724229-43725379	1:45200557-45200610	B73	221	1:43724124-43724229	1:43725379-43725578	1150	1006	0.874783	TE-InDel	DNA/hAT	GRMZM2G052581	41.733	2.43873	0.79541	B73	indel+	4	12	16	0.252452	ns
b0049	Zm00001d028868	1	49087869	49093033	-	1:49093759-49093766	1:50595833-50595958	Mo17	733	1:49093567-49093766	1:49093759-49093912	125	112	0.896	TE-InDel	DNA	GRMZM2G013783	63.9367	3.12013	0.869386	B73	indel-	1	2	3
b0050	Zm00001d028948	1	52518690	52523101	+	1:52517630-52517671	1:54137690-54139514	Mo17	1019	1:52517434-52517630	1:52517671-52517852	1824	1739	0.953399	TE-InDel	LTR/Gypsy	GRMZM2G152891	21.7489	-21.8681	0.538053	MO17	indel+	1	5	6
b0051	Zm00001d028973	1	53309064	53309600	+	1:53306413-53306717	1:55077657-55077660	B73	2347	1:53306257-53306413	1:53306717-53306908	304	300	0.986842	TE-InDel	DNA/PIF-Harbinger	GRMZM2G174680	33.5073	0.794193	0.719521	B73	indel+	8	8	16	0.0228672	significant	indel+	consistent
b0052	Zm00001d028973	1	53309064	53309600	+	1:53308409-53308922	1:55078349-55078358	B73	142	1:53308210-53308409	1:53308922-53309116	513	379	0.738791	TE-InDel	DNA/hAT	GRMZM2G174680	33.5073	0.794193	0.719521	B73	indel+	5	11	16	0.00149338	significant	indel+	consistent	yes	3.70763	0.0571547
b0056	Zm00001d029035	1	55558413	55560877	+	1:55557166-55557174	1:57144439-57144629	Mo17	1247	1:55556969-55557174	1:55557166-55557335	190	190	1	TE-InDel	DNA	GRMZM2G032912	31.6512	0.144956	0.664189	B73	indel-	10	2	12	0.409629	ns
b0057	Zm00001d029047	1	56040100	56042760	+	1:56038829-56039349	1:57490115-57490117	B73	751	1:56038630-56038829	1:56039349-56039550	520	503	0.967308	TE-InDel	DNA/hAT	GRMZM2G100288	61.5285	19.4602	0.87143	B73	indel+	3	13	16	0.0354134	significant	indel+	consistent	yes	8.20045	0.00497178
b0058	Zm00001d029061	1	56853854	56855533	+	1:56852426-56852429	1:58276764-58276892	Mo17	1428	1:56852230-56852429	1:56852426-56852626	128	128	1	TE-InDel	DNA/PIF-Harbinger	GRMZM2G353195	40.7707	-1.31674	0.700875	MO17	indel+	12	3	15	0.0227723	significant	indel-	inconsistent
b0059	Zm00001d029061	1	56853854	56855533	+	1:56853145-56853544	1:58277470-58277474	B73	310	1:56852946-56853145	1:56853544-56853737	399	399	1	TE-InDel	DNA	GRMZM2G353195	40.7707	-1.31674	0.700875	MO17	indel-	2	14	16	0.000714306	significant	indel+	inconsistent
b0060	Zm00001d029180	1	61214711	61233546	+	1:61214496-61214498	1:62550693-62550917	Mo17	215	1:61214299-61214498	1:61214496-61214692	224	218	0.973214	TE-InDel	DNA/MuDR	GRMZM2G469162	31.5979	2.60412	0.629898	B73	indel-	5	7	12	0.0238451	significant	indel-	consistent
b0061	Zm00001d029242	1	63479560	63480471	+	1:63478655-63479467	1:64948124-64948131	B73	93	1:63478456-63478655	1:63479467-63479667	812	704	0.866995	TE-InDel	LTR/Gypsy	GRMZM2G168665	38.0082	-0.879903	0.756293	MO17	indel-	2	14	16	0.106113	ns
b0062	Zm00001d029325	1	65991013	65992879	-	1:65993246-65993499	1:67568849-67568919	B73	367	1:65993047-65993246	1:65993499-65993701	253	22	0.0869565	TE-InDel	DNA	GRMZM2G042683	31.8976	2.80169	0.640958	B73	indel+	7	9	16	0.0759807	ns
b0063	Zm00001d029325	1	65991013	65992879	-	1:65995270-65997026	1:67570634-67570642	B73	2391	1:65995071-65995270	1:65997026-65997226	1756	1181	0.672551	TE-InDel	DNA/hAT	GRMZM2G042683	31.8976	2.80169	0.640958	B73	indel+	7	9	16	0.0759807	ns
b0064	Zm00001d029380	1	68392423	68396629	-	1:68396714-68396716	1:69728627-69729169	Mo17	87	1:68396518-68396716	1:68396714-68396847	542	542	1	TE-InDel	DNA/PIF-Harbinger	GRMZM2G104353	42.3673	3.65592	0.698436	B73	indel-	5	8	13	0.961863	ns
b0065	Zm00001d029418	1	69732293	69734824	-	1:69735309-69735616	1:70973684-70973690	B73	485	1:69735105-69735309	1:69735616-69735815	307	306	0.996743	TE-InDel	DNA/PIF-Harbinger	GRMZM2G077991	25.5547	16.3036	0.541148	B73	indel+	2	14	16	0.868611	ns
b0066	Zm00001d029460	1	71820234	71820986	+	1:71819935-71819945	1:73107402-73108116	Mo17	289	1:71819738-71819935	1:71819945-71820144	714	714	1	TE-InDel	DNA/MuDR	GRMZM5G828488	25.6892	0.777088	0.516798	B73	indel-	3	12	15	0.135743	ns
b0067	Zm00001d029473	1	72294486	72300404	+	1:72293613-72293616	1:73544100-73544297	Mo17	873	1:72293420-72293616	1:72293613-72293813	197	187	0.949239	TE-InDel	DNA/Helitron	GRMZM2G110076	48.1336	2.26619	0.799764	B73	indel-	9	3	12	0.19985	ns
b0068	Zm00001d029475	1	72345031	72345957	-	1:72346714-72347009	1:73574929-73574932	B73	757	1:72346528-72346714	1:72347009-72347208	295	159	0.538983	TE-InDel	DNA/hAT	GRMZM2G110027	23.7449	1.84368	0.530409	B73	indel+	12	4	16	0.0010825	significant	indel+	consistent
b0069	Zm00001d029475	1	72345031	72345957	-	1:72347554-72347560	1:73575479-73575801	Mo17	1597	1:72347356-72347554	1:72347560-72347758	322	322	1	TE-InDel	DNA/PIF-Harbinger	GRMZM2G110027	23.7449	1.84368	0.530409	B73	indel-	2	11	13	0.0210175	significant	indel-	consistent
b0070	Zm00001d029590	1	78107028	78113337	-	1:78116775-78116900	1:79025672-79025675	B73	3438	1:78116576-78116775	1:78116900-78117018	125	114	0.912	TE-InDel	DNA	GRMZM2G074138	51.2222	-2.79406	0.874013	MO17	indel-	5	11	16	0.230948	ns
b0071	Zm00001d029594	1	78239819	78241044	-	1:78241571-78241705	1:79111525-79111527	B73	527	1:78241372-78241571	1:78241705-78241822	134	130	0.970149	TE-InDel	LTR/Gypsy	GRMZM2G077316	51.3939	9.68436	0.833788	B73	indel+	5	11	16	0.0177335	significant	indel+	consistent
b0072	Zm00001d029626	1	80234015	80259023	-	1:80259358-80259360	1:81080121-81080344	Mo17	337	1:80259161-80259360	1:80259358-80259557	223	222	0.995516	TE-InDel	DNA/PIF-Harbinger	GRMZM2G050984	36.9899	-2.78255	0.546523	MO17	indel+	12	4	16	0.830203	ns
b0073	Zm00001d029662	1	81793904	81795995	+	1:81792738-81793750	1:82362714-82362721	B73	154	1:81792539-81792738	1:81793750-81793949	1012	562	0.555336	TE-InDel	DNA/hAT	GRMZM2G143703	36.9286	-1.65172	0.557142	MO17	indel-	6	10	16	0.00092519	significant	indel-	consistent
b0074	Zm00001d029726	1	84228888	84232398	-	1:84232726-84233398	1:84722391-84722397	B73	328	1:84232530-84232726	1:84233398-84233505	672	627	0.933036	TE-InDel	DNA/PIF-Harbinger	GRMZM2G162251	23.4037	-2.42235	0.546942	MO17	indel-	8	8	16	0.161753	ns
b0077	Zm00001d029750	1	85465506	85472221	-	1:85472691-85472697	1:86064443-86065062	Mo17	470	1:85472507-85472691	1:85472697-85472893	619	619	1	TE-InDel	DNA/PIF-Harbinger	GRMZM2G097249	27.1709	-1.47377	0.576806	MO17	indel+	9	4	13	0.286456	ns
b0078	Zm00001d029750	1	85465506	85472221	-	1:85473160-85474381	1:86065528-86065553	B73	939	1:85472961-85473160	1:85474381-85474580	1221	689	0.564292	TE-InDel	LINE/L1	GRMZM2G097249	27.1709	-1.47377	0.576806	MO17	indel-	4	12	16	0.0206013	significant	indel-	consistent
b0079	Zm00001d029783	1	86734087	86736135	+	1:86732100-86732108	1:87286185-87286468	Mo17	1987	1:86731973-86732108	1:86732100-86732314	283	282	0.996466	TE-InDel	DNA/hAT	GRMZM2G026147	34.164	2.01419	0.561303	B73	indel-	7	7	14	0.762383	ns
b0080	Zm00001d029783	1	86734087	86736135	+	1:86732819-86732833	1:87287173-87287421	Mo17	1254	1:86732620-86732819	1:86732833-86733031	248	187	0.754032	TE-InDel	DNA/PIF-Harbinger	GRMZM2G026147	34.164	2.01419	0.561303	B73	indel-	7	4	11	0.176149	ns
b0081	Zm00001d029783	1	86734087	86736135	+	1:86733238-86733242	1:87287833-87287965	Mo17	845	1:86733051-86733238	1:86733242-86733439	132	130	0.984848	TE-InDel	DNA/Helitron	GRMZM2G026147	34.164	2.01419	0.561303	B73	indel-	5	9	14	0.50674	ns
b0082	Zm00001d029803	1	87586799	87591619	-	1:87591711-87591979	1:88118782-88118931	B73	92	1:87591547-87591711	1:87591979-87592163	268	143	0.533582	TE-InDel	LTR/Gypsy	GRMZM2G047187	66.569	5.50208	0.923991	B73	indel+	7	9	16	0.0330856	significant	indel+	consistent
b0083	Zm00001d029803	1	87586799	87591619	-	1:87592163-87592271	1:88119108-88119111	B73	544	1:87591979-87592163	1:87592271-87592470	108	86	0.796296	TE-InDel	Simple_repeat	GRMZM2G047187	66.569	5.50208	0.923991	B73	indel+	5	11	16	0.964276	ns
b0084	Zm00001d029963	1	96573408	96575415	+	1:96571181-96572673	1:96628642-96628646	B73	735	1:96570982-96571181	1:96572673-96572873	1492	790	0.529491	TE-InDel	DNA/MuDR	GRMZM2G088524	50.5812	6.52506	0.640252	B73	indel+	6	10	16	0.643	ns
b0085	Zm00001d029997	1	98382117	98384521	+	1:98381704-98381706	1:98397294-98397398	Mo17	413	1:98381505-98381706	1:98381704-98381904	104	0	0	none-TE-InDel		GRMZM2G050961	45.4289	4.5262	0.609417	B73	indel-	8	5	13	0.0196423	significant	indel-	consistent
b0086	Zm00001d030101	1	105700155	105702010	-	1:105702502-105702516	1:105466398-105467612	Mo17	506	1:105702317-105702516	1:105702502-105702702	1214	1122	0.924217	TE-InDel	DNA/Helitron	GRMZM2G057690	36.3259	2.80863	0.60774	B73	indel-	2	14	16	0.261164	ns
b0087	Zm00001d030310	1	121458401	121462310	-	1:121462652-121462789	1:122453867-122453870	B73	342	1:121462453-121462652	1:121462789-121462989	137	137	1	TE-InDel	LTR/Copia	GRMZM2G129413	42.1275	15.0377	0.711634	B73	indel+	5	11	16	0.492027	ns
b0088	Zm00001d030310	1	121458401	121462310	-	1:121465474-121466452	1:122455840-122455989	B73	3164	1:121465330-121465474	1:121466452-121466650	978	948	0.969325	TE-InDel	LINE/L1	GRMZM2G129413	42.1275	15.0377	0.711634	B73	indel+	9	7	16	0.544902	ns
b0089	Zm00001d030310	1	121458401	121462310	-	1:121467085-121467094	1:122456626-122457147	Mo17	4775	1:121466888-121467085	1:121467094-121467287	521	507	0.973129	TE-InDel	DNA/hAT	GRMZM2G129413	42.1275	15.0377	0.711634	B73	indel-	3	9	12	0.524352	ns
b0090	Zm00001d030832	1	162231719	162233777	+	1:162229814-162229818	1:163044896-163045209	Mo17	1905	1:162229620-162229818	1:162229814-162230017	313	313	1	TE-InDel	DNA/PIF-Harbinger	GRMZM2G331902	40.9957	2.01256	0.646563	B73	indel-	5	6	11	0.543558	ns
b0091	Zm00001d031062	1	175258666	175260443	+	1:175257190-175257891	1:177235493-177235530	B73	775	1:175256992-175257190	1:175257891-175258094	701	179	0.25535	TE-InDel	DNA	GRMZM2G136237	19.4516	-1.60615	0.529579	MO17	indel-	14	2	16	0.117235	ns
b0093	Zm00001d031316	1	185876713	185882166	-	1:185884964-185884967	1:187589701-187589880	Mo17	2801	1:185884766-185884967	1:185884964-185885159	179	179	1	TE-InDel	DNA/PIF-Harbinger	GRMZM2G113840	52.6675	12.3911	0.816549	B73	indel-	5	7	12	0.651301	ns
b0094	Zm00001d031329	1	186194755	186199511	-	1:186199854-186199888	1:188001119-188001465	Mo17	343	1:186199659-186199854	1:186199888-186200085	346	197	0.569364	TE-InDel	DNA/Helitron	GRMZM2G170299	25.1215	0.998805	0.615271	B73	indel-	6	8	14	0.316714	ns
b0095	Zm00001d031329	1	186194755	186199511	-	1:186200107-186200107	1:188001682-188002669	Mo17	596	1:186199909-186200107	1:186200107-186200299	987	373	0.377913	TE-InDel	DNA	GRMZM2G170299	25.1215	0.998805	0.615271	B73	indel-	6	8	14	0.253278	ns
b0096	Zm00001d031329	1	186194755	186199511	-	1:186200922-186203127	1:188003466-188003468	B73	1411	1:186200726-186200922	1:186203127-186203323	2205	2205	1	TE-InDel	DNA/PIF-Harbinger	GRMZM2G170299	25.1215	0.998805	0.615271	B73	indel+	7	9	16	0.0314282	significant	indel-	inconsistent
b0097	Zm00001d031529	1	192960961	192972116	-	1:192972174-192972764	1:192915479-192915483	B73	58	1:192971988-192972174	1:192972764-192972965	590	584	0.989831	TE-InDel	DNA/hAT	GRMZM2G449123	63.0635	16.5915	0.849779	B73	indel+	8	8	16	0.0185516	significant	indel+	consistent
b0098	Zm00001d031545	1	193834072	193835680	-	1:193838607-193838611	1:193587922-193589583	Mo17	2927	1:193838408-193838607	1:193838611-193838805	1661	1232	0.741722	TE-InDel	DNA/MuDR	GRMZM2G337191	26.5979	2.38627	0.617824	B73	indel-	8	7	15	0.0807159	ns
b0099	Zm00001d031667	1	198119172	198130785	-	1:198131265-198131265	1:198373121-198373614	Mo17	480	1:198131066-198131265	1:198131265-198131370	493	486	0.985801	TE-InDel	DNA/hAT	GRMZM5G872204	57.9701	-2.9431	0.851649	MO17	indel+	8	6	14	0.041157	significant	indel+	consistent
b0100	Zm00001d031667	1	198119172	198130785	-	1:198132515-198133190	1:198374237-198374244	B73	1730	1:198132316-198132515	1:198133190-198133392	675	675	1	TE-InDel	DNA/hAT	GRMZM5G872204	57.9701	-2.9431	0.851649	MO17	indel-	6	10	16	0.0360914	significant	indel-	consistent
b0101	Zm00001d031667	1	198119172	198130785	-	1:198133687-198133689	1:198374734-198374967	Mo17	2904	1:198133487-198133689	1:198133687-198133887	233	233	1	TE-InDel	DNA	GRMZM5G872204	57.9701	-2.9431	0.851649	MO17	indel+	8	7	15	0.10205	ns
b0102	Zm00001d031700	1	198833249	198838390	-	1:198841410-198841578	1:199039439-199039455	B73	3020	1:198841187-198841410	1:198841578-198841769	168	99	0.589286	TE-InDel	DNA/Helitron	GRMZM2G069476	25.681	0.627371	0.572934	B73	indel+	8	8	16	0.0519046	ns
b0103	Zm00001d031700	1	198833249	198838390	-	1:198843163-198843246	1:199040814-199041347	Mo17	4773	1:198842972-198843163	1:198843246-198843364	533	424	0.795497	TE-InDel	DNA/hAT	GRMZM2G069476	25.681	0.627371	0.572934	B73	indel-	2	10	12	0.340077	ns
b0104	Zm00001d031727	1	199715758	199718643	+	1:199715404-199715527	1:199927645-199927650	B73	231	1:199715205-199715404	1:199715527-199715727	123	118	0.95935	TE-InDel	DNA/PIF-Harbinger	GRMZM2G175423	29.2153	4.31586	0.597447	B73	indel+	6	10	16	0.290973	ns
b0106	Zm00001d031837	1	203221978	203225256	+	1:203220785-203220874	1:203268677-203268905	Mo17	1104	1:203220587-203220785	1:203220874-203220978	228	135	0.592105	TE-InDel	DNA/PIF-Harbinger	GRMZM2G133413	59.8441	4.06615	0.89559	B73	indel-	5	4	9	0.0631851	ns
b0107	Zm00001d031867	1	204677117	204680173	+	1:204676296-204676793	1:204580941-204580948	B73	324	1:204676097-204676296	1:204676793-204676994	497	486	0.977867	TE-InDel	DNA/hAT	GRMZM2G123016	48.8092	-0.130372	0.844509	MO17	indel-	4	12	16	0.0616526	ns
b0108	Zm00001d031878	1	205166704	205167543	+	1:205165578-205165579	1:205002135-205003597	Mo17	1126	1:205165382-205165579	1:205165578-205165778	1462	569	0.389193	TE-InDel	DNA/Helitron	AC186231.4_FG002	23.4232	8.00602	0.647115	B73	indel-	2	12	14	0.947133	ns
b0109	Zm00001d031878	1	205166704	205167543	+	1:205166472-205166473	1:205004454-205004777	Mo17	232	1:205166328-205166473	1:205166472-205166660	323	318	0.98452	TE-InDel	LTR/Gypsy	AC186231.4_FG002	23.4232	8.00602	0.647115	B73	indel-	3	5	8	0.729876	ns
b0110	Zm00001d031893	1	205617823	205620362	+	1:205616681-205617744	1:205536339-205536346	B73	79	1:205616484-205616681	1:205617744-205617945	1063	1063	1	TE-InDel	DNA/hAT	GRMZM2G179703	30.9667	7.12155	0.602633	B73	indel+	7	9	16	0.00307342	significant	indel+	consistent	yes	8.96383	0.0035104
b0111	Zm00001d031939	1	207515536	207517495	-	1:207518016-207518020	1:207285314-207285635	Mo17	525	1:207517816-207518020	1:207518016-207518216	321	319	0.993769	TE-InDel	DNA/PIF-Harbinger	GRMZM2G057608	70.2222	53.7683	0.900338	B73	indel-	2	9	11	0.000308221	significant	indel+	inconsistent
b0112	Zm00001d031940	1	207526463	207529592	-	1:207529934-207529936	1:207289227-207293769	Mo17	344	1:207529734-207529936	1:207529934-207530134	4542	2773	0.610524	TE-InDel	DNA/PIF-Harbinger	GRMZM2G058402	80.2241	-7.17659	0.932383	MO17	indel+	5	10	15	0.945962	ns
b0113	Zm00001d032036	1	210137790	210138853	+	1:210137007-210137390	1:209687339-209687346	B73	400	1:210136810-210137007	1:210137390-210137591	383	381	0.994778	TE-InDel	DNA/hAT	GRMZM2G460383	19.7832	-1.37855	0.511927	MO17	indel-	3	13	16	0.875567	ns
b0114	Zm00001d032036	1	210137790	210138853	+	1:210137672-210137674	1:209687614-209688023	Mo17	118	1:210137474-210137674	1:210137672-210137872	409	306	0.748166	TE-InDel	DNA/PIF-Harbinger	GRMZM2G460383	19.7832	-1.37855	0.511927	MO17	indel+	4	10	14	0.0570535	ns
b0115	Zm00001d032049	1	210749060	210752906	-	1:210753256-210754831	1:210488300-210488379	B73	350	1:210753057-210753256	1:210754831-210755037	1575	1574	0.999365	TE-InDel	DNA/Helitron	GRMZM2G148281	43.8308	3.0412	0.76681	B73	indel+	8	7	15	0.434997	ns
b0117	Zm00001d032109	1	213250008	213254980	+	1:213248665-213248683	1:213151800-213152172	Mo17	1343	1:213248484-213248683	1:213248665-213248865	372	346	0.930108	TE-InDel	DNA/hAT	GRMZM2G048276	26.6173	1.19828	0.597684	B73	indel-	2	13	15	0.141034	ns
b0118	Zm00001d032116	1	213635320	213644930	-	1:213645815-213645993	1:213590773-213590777	B73	885	1:213645631-213645815	1:213645993-213646184	178	178	1	TE-InDel	DNA/PIF-Harbinger	GRMZM2G428554	28.94	0.345454	0.594288	B73	indel+	5	11	16	0.0453721	significant	indel+	consistent
b0119	Zm00001d032142	1	214314919	214320679	+	1:214313634-214314857	1:214117217-214117224	B73	62	1:214313456-214313634	1:214314857-214315049	1223	929	0.759608	TE-InDel	DNA/MuDR	GRMZM2G151955	37.523	3.18956	0.64062	B73	indel+	10	6	16	0.789507	ns
b0120	Zm00001d032153	1	214578151	214584860	-	1:214585418-214585420	1:214414726-214414906	Mo17	560	1:214585221-214585420	1:214585418-214585520	180	151	0.838889	TE-InDel	DNA/Helitron	GRMZM2G131434	32.8451	-2.06795	0.652698	MO17	indel+	4	11	15	0.54275	ns
b0121	Zm00001d032153	1	214578151	214584860	-	1:214586786-214586794	1:214416427-214416702	Mo17	1926	1:214586588-214586786	1:214586794-214586993	275	215	0.781818	TE-InDel	Simple_repeat	GRMZM2G131434	32.8451	-2.06795	0.652698	MO17	indel+	6	8	14	0.0681342	ns
b0122	Zm00001d032153	1	214578151	214584860	-	1:214587523-214589327	1:214417388-214417396	B73	2663	1:214587324-214587523	1:214589327-214589464	1804	1582	0.87694	TE-InDel	LTR/Copia	GRMZM2G131434	32.8451	-2.06795	0.652698	MO17	indel-	3	13	16	0.566205	ns
b0124	Zm00001d032420	1	225930295	225933936	-	1:225934148-225934159	1:226043466-226043829	Mo17	212	1:225933949-225934148	1:225934159-225934358	363	294	0.809917	TE-InDel	DNA/PIF-Harbinger	GRMZM2G025855	35.1027	-2.89259	0.554001	MO17	indel+	3	12	15	0.0520346	ns
b0125	Zm00001d032465	1	227580069	227583574	+	1:227576928-227576935	1:227695281-227695647	Mo17	3141	1:227576738-227576935	1:227576928-227577134	366	364	0.994536	TE-InDel	DNA/hAT	GRMZM2G123624	67.4707	6.06919	0.873667	B73	indel-	11	3	14	0.0010117	significant	indel-	consistent
b0126	Zm00001d032471	1	227702377	227715447	-	1:227717507-227717649	1:227911796-227911803	B73	2060	1:227717308-227717507	1:227717649-227717857	142	141	0.992958	TE-InDel	DNA/hAT	AC210173.4_FG002	29.3267	1.20564	0.537821	B73	indel+	8	8	16	0.746734	ns
b0127	Zm00001d032472	1	227853798	227862240	-	1:227864966-227864969	1:227978508-227978826	Mo17	2729	1:227864772-227864969	1:227864966-227865162	318	317	0.996855	TE-InDel	DNA/PIF-Harbinger	GRMZM2G031572	21.2109	1.41507	0.55312	B73	indel-	1	14	15
b0128	Zm00001d032504	1	228756797	228759565	-	1:228760879-228760882	1:228620792-228621200	Mo17	1317	1:228760684-228760882	1:228760879-228761078	408	326	0.79902	TE-InDel	DNA/PIF-Harbinger	GRMZM2G438386	35.9957	5.31877	0.67961	B73	indel-	2	11	13	0.784786	ns
b0129	Zm00001d032529	1	229632719	229640091	+	1:229628808-229629305	1:229476932-229476932	B73	3414	1:229628679-229628808	1:229629305-229629448	497	494	0.993964	TE-InDel	DNA/PIF-Harbinger	GRMZM5G869779	74.7392	-2.61793	0.918016	MO17	indel-	14	2	16	0.0457157	significant	indel-	consistent
b0130	Zm00001d032533	1	229829797	229830137	-	1:229830431-229830483	1:229647177-229647369	Mo17	294	1:229830232-229830431	1:229830483-229830678	192	132	0.6875	TE-InDel	DNA/PIF-Harbinger	GRMZM2G171559	29.7016	1.44853	0.713912	B73	indel-	3	10	13	0.396099	ns
b0131	Zm00001d032686	1	234430393	234435468	-	1:234436302-234436309	1:234713091-234713496	Mo17	841	1:234436110-234436309	1:234436302-234436502	405	0	0	none-TE-InDel		GRMZM2G048434	45.4165	4.17333	0.821798	B73	indel-	8	5	13	0.970204	ns
b0132	Zm00001d032686	1	234430393	234435468	-	1:234436811-234436817	1:234714022-234714146	Mo17	1349	1:234436616-234436817	1:234436811-234437013	124	123	0.991935	TE-InDel	DNA	GRMZM2G048434	45.4165	4.17333	0.821798	B73	indel-	8	6	14	0.982724	ns
b0134	Zm00001d032688	1	234474198	234477222	-	1:234477848-234477856	1:234727359-234727894	Mo17	634	1:234477657-234477856	1:234477848-234478048	535	391	0.730841	TE-InDel	DNA/hAT	GRMZM5G879665	21.043	2.21312	0.516952	B73	indel-	3	11	14	0.861232	ns
b0135	Zm00001d032688	1	234474198	234477222	-	1:234478240-234478281	1:234728269-234729236	Mo17	1018	1:234478041-234478240	1:234478281-234478396	967	198	0.204757	TE-InDel	Unknown	GRMZM5G879665	21.043	2.21312	0.516952	B73	indel-	5	10	15	0.421357	ns
b0136	Zm00001d032897	1	242037797	242040088	-	1:242040429-242040432	1:242572554-242572942	Mo17	344	1:242040229-242040432	1:242040429-242040624	388	246	0.634021	TE-InDel	DNA/PIF-Harbinger	GRMZM2G038898	62.8316	13.2942	0.957795	B73	indel-	0	7	7
b0138	Zm00001d033105	1	250320688	250322547	+	1:250320190-250320196	1:250271068-250271464	Mo17	498	1:250320002-250320196	1:250320190-250320395	396	393	0.992424	TE-InDel	DNA/hAT	GRMZM2G146818	25.6514	2.24977	0.59302	B73	indel-	1	13	14
b0139	Zm00001d033214	1	254400042	254402806	+	1:254397267-254397590	1:254284600-254284602	B73	2452	1:254397101-254397267	1:254397590-254397791	323	320	0.990712	TE-InDel	DNA/piggyBac	GRMZM2G023392	39.192	-5.69825	0.675246	MO17	indel-	2	14	16	0.678096	ns
b0140	Zm00001d033272	1	256999749	257005986	+	1:256996073-256996077	1:256870752-256871064	Mo17	3676	1:256995879-256996077	1:256996073-256996271	312	311	0.996795	TE-InDel	DNA/PIF-Harbinger	AC207347.3_FG005	35.378	-1.13292	0.666571	MO17	indel+	8	5	13	0.107796	ns
b0141	Zm00001d033272	1	256999749	257005986	+	1:256996424-256996432	1:256871434-256871964	Mo17	3325	1:256996241-256996432	1:256996424-256996608	530	335	0.632075	TE-InDel	DNA/hAT	AC207347.3_FG005	35.378	-1.13292	0.666571	MO17	indel+	9	4	13	0.128174	ns
b0145	Zm00001d033292	1	257767623	257772369	-	1:257776404-257776897	1:257834787-257834793	B73	4035	1:257776265-257776404	1:257776897-257777006	493	295	0.598377	TE-InDel	DNA	GRMZM2G070252	24.7091	3.45042	0.606233	B73	indel+	11	5	16	0.020861	significant	indel+	consistent
b0146	Zm00001d033297	1	258038207	258048636	-	1:258048971-258048973	1:258251959-258253248	Mo17	335	1:258048772-258048971	1:258048973-258049107	1289	1279	0.992242	TE-InDel	LTR/Copia	GRMZM2G342105	33.7854	-0.80189	0.718841	MO17	indel+	1	6	7
b0147	Zm00001d033383	1	261132562	261138355	-	1:261138505-261138506	1:261098646-261099008	Mo17	150	1:261138306-261138505	1:261138506-261138706	362	287	0.792818	TE-InDel	DNA/hAT	GRMZM2G027663	33.7247	17.9361	0.575772	B73	indel-	6	2	8	0.0162246	significant	indel-	consistent
b0148	Zm00001d033451	1	263011439	263016268	-	1:263016537-263016543	1:262573092-262573417	Mo17	275	1:263016358-263016543	1:263016537-263016735	325	324	0.996923	TE-InDel	DNA/PIF-Harbinger	GRMZM2G369130	34.3242	2.5393	0.773814	B73	indel-	7	7	14	0.0626023	ns
b0149	Zm00001d033451	1	263011439	263016268	-	1:263017873-263018146	1:262574743-262574861	B73	1605	1:263017679-263017873	1:263018146-263018340	273	246	0.901099	TE-InDel	LTR/Copia	GRMZM2G369130	34.3242	2.5393	0.773814	B73	indel+	9	6	15	0.351617	ns
b0151	Zm00001d033578	1	267644850	267648355	+	1:267641393-267641707	1:267185318-267185321	B73	3143	1:267641198-267641393	1:267641707-267641843	314	311	0.990446	TE-InDel	DNA/PIF-Harbinger	GRMZM2G113569	43.6805	1.1072	0.770465	B73	indel+	3	13	16	0.124408	ns
b0153	Zm00001d033745	1	272677505	272681013	-	1:272682203-272682212	1:272265294-272266493	Mo17	1199	1:272682013-272682212	1:272682203-272682403	1199	1199	1	TE-InDel	DNA/hAT	GRMZM2G023110	24.0666	3.22399	0.555608	B73	indel-	1	14	15
b0154	Zm00001d033818	1	274726910	274729148	-	1:274729237-274729251	1:274264725-274264874	Mo17	103	1:274729046-274729251	1:274729237-274729436	149	111	0.744966	TE-InDel	DNA/Helitron	GRMZM2G047372	56.1564	2.85234	0.855969	B73	indel-	0	9	9
b0155	Zm00001d033849	1	275752027	275757102	-	1:275757395-275757395	1:275213259-275217417	Mo17	293	1:275757196-275757395	1:275757395-275757596	4158	2356	0.566619	TE-InDel	DNA/Helitron	GRMZM2G088162	43.9863	1.84337	0.785826	B73	indel-	5	6	11	0.0980197	ns
b0156	Zm00001d033883	1	277354273	277354749	+	1:277352227-277352938	1:276839880-276839883	B73	1335	1:277352025-277352227	1:277352938-277353129	711	396	0.556962	TE-InDel	DNA/PIF-Harbinger	GRMZM2G058884	30.5755	-0.217245	0.595179	MO17	indel-	3	13	16	0.66131	ns
b0157	Zm00001d033922	1	278618558	278620219	+	1:278615786-278615895	1:278084163-278087023	Mo17	2663	1:278615639-278615786	1:278615895-278616071	2860	2514	0.879021	TE-InDel	LTR/Copia	GRMZM2G131575	23.9044	0.456311	0.545967	B73	indel-	3	10	13	0.828806	ns
b0158	Zm00001d033922	1	278618558	278620219	+	1:278616071-278616403	1:278087200-278087270	B73	2155	1:278615895-278616071	1:278616403-278616595	332	288	0.86747	TE-InDel	DNA/hAT	GRMZM2G131575	23.9044	0.456311	0.545967	B73	indel+	12	4	16	0.38021	ns
b0159	Zm00001d033922	1	278618558	278620219	+	1:278616625-278617824	1:278087495-278087506	B73	734	1:278616428-278616625	1:278617824-278618012	1199	1199	1	TE-InDel	DNA/MuDR	GRMZM2G131575	23.9044	0.456311	0.545967	B73	indel+	12	4	16	0.38021	ns
b0160	Zm00001d033922	1	278618558	278620219	+	1:278618012-278618532	1:278087683-278087705	B73	26	1:278617824-278618012	1:278618532-278618729	520	510	0.980769	TE-InDel	DNA/hAT	GRMZM2G131575	23.9044	0.456311	0.545967	B73	indel+	12	4	16	0.779328	ns
b0161	Zm00001d033955	1	279587675	279592647	+	1:279584402-279584807	1:278780107-278780118	B73	2868	1:279584207-279584402	1:279584807-279585000	405	0	0	none-TE-InDel		GRMZM2G001869	18.5351	1.06558	0.556529	B73	indel+	11	5	16	0.379284	ns
b0162	Zm00001d033955	1	279587675	279592647	+	1:279585273-279585275	1:278780581-278781080	Mo17	2402	1:279585076-279585275	1:279585273-279585473	499	432	0.865731	TE-InDel	DNA/EnSpm/CACTA	GRMZM2G001869	18.5351	1.06558	0.556529	B73	indel-	2	12	14	0.454936	ns
b0164	Zm00001d033985	1	280282917	280285382	+	1:280279727-280279856	1:279463477-279463489	B73	3061	1:280279519-280279727	1:280279856-280280055	129	129	1	TE-InDel	LTR/Gypsy	GRMZM2G010034	29.433	0.443723	0.633359	B73	indel+	4	12	16	0.449547	ns
b0165	Zm00001d034012	1	281133200	281140918	-	1:281140994-281140994	1:280405476-280409327	Mo17	76	1:281140806-281140994	1:281140994-281141194	3851	2594	0.673591	TE-InDel	LTR/Gypsy	GRMZM2G456690	28.4839	0.590092	0.624179	B73	indel-	6	6	12	0.0191521	significant	indel+	inconsistent
b0166	Zm00001d034112	1	284242028	284244325	-	1:284245528-284245537	1:283455950-283456305	Mo17	1203	1:284245325-284245528	1:284245537-284245671	355	86	0.242254	TE-InDel	DNA/PIF-Harbinger	GRMZM2G091578	22.3119	8.04793	0.575214	B73	indel-	7	6	13	0.0389317	significant	indel+	inconsistent
b0167	Zm00001d034112	1	284242028	284244325	-	1:284245671-284245827	1:283456431-283456439	B73	1346	1:284245537-284245671	1:284245827-284245963	156	125	0.801282	TE-InDel	DNA/MuDR	GRMZM2G091578	22.3119	8.04793	0.575214	B73	indel+	7	9	16	0.228601	ns
b0168	Zm00001d034112	1	284242028	284244325	-	1:284245963-284247448	1:283456568-283456627	B73	1638	1:284245827-284245963	1:284247448-284247664	1485	1242	0.836364	TE-InDel	DNA/MuDR	GRMZM2G091578	22.3119	8.04793	0.575214	B73	indel+	6	10	16	0.0269395	significant	indel-	inconsistent
b0169	Zm00001d034112	1	284242028	284244325	-	1:284248179-284248184	1:283457331-283459015	Mo17	3859	1:284247982-284248184	1:284248179-284248340	1684	1683	0.999406	TE-InDel	LTR/Gypsy	GRMZM2G091578	22.3119	8.04793	0.575214	B73	indel-	4	4	8	0.0654944	ns
b0170	Zm00001d034112	1	284242028	284244325	-	1:284248340-284249026	1:283459175-283459176	B73	4015	1:284248179-284248340	1:284249026-284249227	686	686	1	TE-InDel	DNA/hAT	GRMZM2G091578	22.3119	8.04793	0.575214	B73	indel+	4	12	16	0.090427	ns
b0171	Zm00001d034126	1	284602370	284604006	-	1:284605484-284605491	1:283841062-283841903	Mo17	1485	1:284605290-284605491	1:284605484-284605684	841	841	1	TE-InDel	DNA/TcMar-Stowaway	GRMZM2G047759	38.9829	2.42184	0.655604	B73	indel-	2	12	14	0.994787	ns
b0174	Zm00001d034180	1	285813436	285817967	-	1:285818326-285819005	1:285507857-285507860	B73	359	1:285818127-285818326	1:285819005-285819201	679	362	0.533137	TE-InDel	DNA/hAT	GRMZM2G164493	40.9129	5.31838	0.77529	B73	indel+	4	12	16	0.511742	ns
b0175	Zm00001d034180	1	285813436	285817967	-	1:285819849-285819852	1:285508724-285509330	Mo17	1882	1:285819650-285819849	1:285819852-285820046	606	603	0.99505	TE-InDel	DNA/hAT	GRMZM2G164493	40.9129	5.31838	0.77529	B73	indel-	2	5	7	0.532635	ns
b0176	Zm00001d034189	1	286080950	286082217	+	1:286078520-286078745	1:285699096-285699098	B73	2205	1:286078321-286078520	1:286078745-286078940	225	225	1	TE-InDel	DNA/MuDR	GRMZM2G039978	69.6513	1.50094	0.82619	B73	indel+	8	8	16	0.0532815	ns
b0179	Zm00001d034317	1	289102198	289104722	+	1:289100798-289101100	1:288494753-288494767	B73	1098	1:289100599-289100798	1:289101100-289101297	302	0	0	none-TE-InDel		GRMZM5G811069	39.1142	1.68985	0.791633	B73	indel+	3	13	16	0.00223331	significant	indel+	consistent
b0180	Zm00001d034340	1	290229241	290231041	-	1:290232221-290232369	1:289599838-289599841	B73	1180	1:290232022-290232221	1:290232369-290232562	148	18	0.121622	TE-InDel	Simple_repeat	GRMZM2G058414	38.8225	1.29089	0.70559	B73	indel+	12	4	16	0.590513	ns
b0181	Zm00001d034345	1	290272584	290276056	-	1:290276387-290277091	1:289711017-289711025	B73	331	1:290276193-290276387	1:290277091-290277257	704	694	0.985795	TE-InDel	DNA/hAT	GRMZM2G058760	32.7722	7.3065	0.726452	B73	indel+	5	11	16	0.054811	ns
b0182	Zm00001d034359	1	290668538	290669359	-	1:290669891-290669898	1:290037450-290038276	Mo17	539	1:290669699-290669898	1:290669891-290670091	826	825	0.998789	TE-InDel	DNA/hAT	GRMZM5G888196	41.77	5.00429	0.759647	B73	indel-	2	10	12	0.48438	ns
b0183	Zm00001d034405	1	292041509	292045751	-	1:292046861-292046886	1:291587850-291588021	Mo17	1110	1:292046662-292046861	1:292046886-292047061	171	0	0	none-TE-InDel		GRMZM2G120657	49.141	8.9013	0.819048	B73	indel-	5	8	13	0.235883	ns
b0184	Zm00001d034405	1	292041509	292045751	-	1:292048338-292048642	1:291589450-291589453	B73	2587	1:292048143-292048338	1:292048642-292048843	304	298	0.980263	TE-InDel	DNA/PIF-Harbinger	GRMZM2G120657	49.141	8.9013	0.819048	B73	indel+	9	7	16	0.904757	ns
b0186	Zm00001d034432	1	292893097	292904934	-	1:292909347-292909725	1:292296357-292296361	B73	4413	1:292909148-292909347	1:292909725-292909919	378	174	0.460317	TE-InDel	DNA	GRMZM2G074404	42.5804	3.85817	0.777632	B73	indel+	8	8	16	0.136731	ns
b0187	Zm00001d034480	1	294122557	294127795	+	1:294121745-294121885	1:293144194-293144564	Mo17	672	1:294121562-294121745	1:294121885-294122084	370	330	0.891892	TE-InDel	NonLTR/L1	GRMZM2G163912	44.283	9.48855	0.795678	B73	indel-	8	6	14	0.138623	ns
b0188	Zm00001d034496	1	294666401	294669418	+	1:294663440-294663450	1:293499431-293499762	Mo17	2951	1:294663241-294663440	1:294663450-294663649	331	329	0.993958	TE-InDel	DNA/hAT	GRMZM2G049888	41.4743	0.432867	0.714025	B73	indel-	7	5	12	0.00778115	significant	indel+	inconsistent
b0189	Zm00001d034509	1	294981881	294987978	-	1:294990352-294990489	1:293941679-293941682	B73	2374	1:294990153-294990352	1:294990489-294990683	137	137	1	TE-InDel	LTR/Gypsy	GRMZM2G176662	55.7537	8.55273	0.8178	B73	indel+	2	14	16	0.495424	ns
b0190	Zm00001d034520	1	295606657	295609284	-	1:295611787-295612030	1:294604959-294604959	B73	2503	1:295611588-295611787	1:295612030-295612231	243	0	0	none-TE-InDel		GRMZM2G062289	30.011	2.5781	0.653655	B73	indel+	9	7	16	0.938579	ns
b0191	Zm00001d034520	1	295606657	295609284	-	1:295613183-295613186	1:294606108-294606231	Mo17	3902	1:295612983-295613186	1:295613183-295613383	123	96	0.780488	TE-InDel	DNA/PIF-Harbinger	GRMZM2G062289	30.011	2.5781	0.653655	B73	indel-	6	9	15	0.342381	ns
b0192	Zm00001d034524	1	295621567	295632863	-	1:295632929-295632932	1:294631201-294631543	Mo17	69	1:295632733-295632932	1:295632929-295633129	342	286	0.836257	TE-InDel	DNA/PIF-Harbinger	GRMZM2G022662	29.2584	1.87671	0.72292	B73	indel-	2	13	15	0.0410583	significant	indel+	inconsistent
b0193	Zm00001d034533	1	295778554	295782540	+	1:295775064-295775350	1:294826366-294826369	B73	3204	1:295774865-295775064	1:295775350-295775549	286	286	1	TE-InDel	DNA/PIF-Harbinger	GRMZM2G082312	37.7948	7.00647	0.654288	B73	indel+	9	7	16	0.0963502	ns
b0194	Zm00001d034533	1	295778554	295782540	+	1:295775877-295775880	1:294826893-294827551	Mo17	2677	1:295775719-295775880	1:295775877-295776019	658	342	0.519757	TE-InDel	DNA/PIF-Harbinger	GRMZM2G082312	37.7948	7.00647	0.654288	B73	indel-	3	10	13	0.217086	ns
b0195	Zm00001d034550	1	296028286	296030453	+	1:296027976-296027983	1:295223182-295224535	Mo17	310	1:296027786-296027983	1:296027976-296028147	1353	1181	0.872875	TE-InDel	DNA	GRMZM2G092663	19.6097	-7.88619	0.578785	MO17	indel+	7	5	12	0.0996984	ns
b0197	Zm00001d034640	1	298682827	298693357	+	1:298682487-298682492	1:298111808-298112205	Mo17	335	1:298682293-298682487	1:298682492-298682694	397	389	0.979849	TE-InDel	LINE/L1	GRMZM2G061662	45.1523	-3.589	0.516395	MO17	indel+	2	9	11	0.851855	ns
b0198	Zm00001d034719	1	300615968	300619520	-	1:300619877-300619879	1:299805606-299805970	Mo17	359	1:300619713-300619879	1:300619877-300620076	364	346	0.950549	TE-InDel	DNA/Helitron	GRMZM2G122045	36.0516	1.68062	0.655977	B73	indel-	4	5	9	0.803638	ns
b0199	Zm00001d034729	1	300852251	300854480	-	1:300855868-300856504	1:299957158-299957163	B73	1388	1:300855672-300855868	1:300856504-300856705	636	636	1	TE-InDel	DNA/PIF-Harbinger	GRMZM2G127309	65.22	4.3801	0.896761	B73	indel+	9	7	16	0.689766	ns
b0200	Zm00001d034781	1	302141835	302144393	-	1:302144763-302144900	1:301185290-301185314	B73	370	1:302144571-302144763	1:302144900-302145099	137	0	0	none-TE-InDel		GRMZM2G113158	30.564	0.577466	0.650072	B73	indel+	9	7	16	0.106952	ns
b0201	Zm00001d034795	1	302374919	302378019	-	1:302379671-302380638	1:301401972-301401980	B73	1652	1:302379472-302379671	1:302380638-302380844	967	967	1	TE-InDel	DNA/hAT	AC217358.3_FG005	25.6886	8.35907	0.551801	B73	indel+	10	6	16	0.0673738	ns
b0202	Zm00001d034841	1	303631232	303633793	-	1:303633852-303634178	1:302713787-302713790	B73	59	1:303633653-303633852	1:303634178-303634366	326	325	0.996933	TE-InDel	DNA	GRMZM2G123901	46.0916	2.25013	0.774148	B73	indel+	4	12	16	0.0476006	significant	indel+	consistent
b0203	Zm00001d034853	1	303814428	303823171	-	1:303824734-303825746	1:302821605-302821613	B73	1563	1:303824535-303824734	1:303825746-303825946	1012	1012	1	TE-InDel	DNA/hAT	GRMZM2G024267	24.7554	2.23938	0.500743	B73	indel+	6	10	16	0.118152	ns
b0204	Zm00001d034871	1	304367515	304374498	-	1:304375101-304375388	1:303337411-303337430	B73	603	1:304374902-304375101	1:304375388-304375580	287	285	0.993031	TE-InDel	DNA/PIF-Harbinger	GRMZM2G112609	58.4098	4.40919	0.817393	B73	indel+	6	10	16	0.348753	ns
b0205	Zm00001d034874	1	304504591	304505238	-	1:304505841-304505841	1:303462742-303463496	Mo17	603	1:304505667-304505841	1:304505841-304506037	754	435	0.576923	TE-InDel	DNA/MuDR	GRMZM2G422671	39.3753	1.25455	0.771509	B73	indel-	6	7	13	0.0505172	ns
b0206	Zm00001d034888	1	304812196	304817687	+	1:304810905-304811293	1:303828298-303828300	B73	903	1:304810715-304810905	1:304811293-304811475	388	388	1	TE-InDel	DNA/PIF-Harbinger	GRMZM2G083717	32.2658	0.9121	0.676542	B73	indel+	12	4	16	0.196323	ns
b0207	Zm00001d001786	2	891741	896781	-	2:900051-900055	2:816234-816426	Mo17	3274	2:899853-900055	2:900051-900219	192	192	1	TE-InDel	DNA	GRMZM2G119759	22.7172	-1.39949	0.59818	MO17	indel+	0	13	13
b0208	Zm00001d001786	2	891741	896781	-	2:900332-900334	2:816703-817428	Mo17	3553	2:900139-900334	2:900332-900500	725	404	0.557241	TE-InDel	DNA/PIF-Harbinger	GRMZM2G119759	22.7172	-1.39949	0.59818	MO17	indel+	2	11	13	0.989815	ns
b0209	Zm00001d001804	2	1251628	1257162	-	2:1257509-1258183	2:1274346-1274377	B73	347	2:1257322-1257509	2:1258183-1258379	674	661	0.980712	TE-InDel	DNA/hAT	GRMZM2G051974	27.1991	-0.81672	0.696769	MO17	indel-	4	12	16	0.803482	ns
b0210	Zm00001d001849	2	1910247	1912431	+	2:1910017-1910145	2:1887113-1887114	B73	102	2:1909820-1910017	2:1910145-1910346	128	126	0.984375	TE-InDel	DNA	GRMZM2G105330	58.0234	1.11846	0.870669	B73	indel+	8	8	16	0.786009	ns
b0214	Zm00001d002027	2	4656652	4661418	+	2:4653248-4653382	2:4622503-4622506	B73	3270	2:4653050-4653248	2:4653382-4653495	134	109	0.813433	TE-InDel	DNA/MuDR	GRMZM2G086801	47.2652	5.46201	0.83366	B73	indel+	4	12	16	0.805743	ns
b0215	Zm00001d002027	2	4656652	4661418	+	2:4653495-4656518	2:4622616-4622616	B73	134	2:4653382-4653495	2:4656518-4656718	3023	3021	0.999338	TE-InDel	DNA/MuDR	GRMZM2G086801	47.2652	5.46201	0.83366	B73	indel+	4	12	16	0.805743	ns
b0216	Zm00001d002038	2	4861458	4865979	+	2:4860068-4860073	2:4858071-4858707	Mo17	1385	2:4859900-4860068	2:4860073-4860275	636	505	0.794025	TE-InDel	LTR/Gypsy	GRMZM2G395114	46.139	2.36622	0.806617	B73	indel-	8	5	13	0.958097	ns
b0218	Zm00001d002098	2	5964116	5965554	-	2:5966499-5969129	2:5907342-5907345	B73	945	2:5966300-5966499	2:5969129-5969331	2630	1484	0.564259	TE-InDel	DNA/EnSpm/CACTA	GRMZM2G023071	32.3454	-0.476452	0.615164	MO17	indel-	4	12	16	0.178963	ns
b0219	Zm00001d002115	2	6097422	6101496	-	2:6102004-6102005	2:6001731-6001875	Mo17	508	2:6101812-6102004	2:6102005-6102205	144	0	0	none-TE-InDel		GRMZM5G824964	52.8394	-33.719	0.903319	MO17	indel+	2	14	16	0.084476	ns
b0220	Zm00001d002115	2	6097422	6101496	-	2:6103320-6103370	2:6003176-6003550	Mo17	1824	2:6103121-6103320	2:6103370-6103569	374	258	0.68984	TE-InDel	DNA/MuDR	GRMZM5G824964	52.8394	-33.719	0.903319	MO17	indel+	2	11	13	0.038194	significant	indel+	consistent
b0221	Zm00001d002115	2	6097422	6101496	-	2:6104371-6104422	2:6004448-6004721	Mo17	2926	2:6104260-6104422	2:6104371-6104564	273	204	0.747253	TE-InDel	DNA/hAT	GRMZM5G824964	52.8394	-33.719	0.903319	MO17	indel+	0	14	14
b0222	Zm00001d002115	2	6097422	6101496	-	2:6104715-6105408	2:6005070-6005103	B73	3219	2:6104516-6104715	2:6105408-6105584	693	667	0.962482	TE-InDel	DNA/hAT	GRMZM5G824964	52.8394	-33.719	0.903319	MO17	indel-	13	3	16	0.00255089	significant	indel-	consistent	yes	3.0126	0.0885425
b0223	Zm00001d002143	2	6636877	6642835	+	2:6634677-6634677	2:6599487-6599743	Mo17	2200	2:6634478-6634677	2:6634677-6634873	256	0	0	none-TE-InDel		GRMZM2G131961	34.4197	-0.81605	0.59751	MO17	indel+	8	6	14	0.999382	ns
b0224	Zm00001d002143	2	6636877	6642835	+	2:6635545-6635563	2:6600597-6600865	Mo17	1314	2:6635347-6635545	2:6635563-6635752	268	182	0.679104	TE-InDel	LTR/Copia	GRMZM2G131961	34.4197	-0.81605	0.59751	MO17	indel+	1	6	7
b0225	Zm00001d002258	2	9081347	9084382	-	2:9085256-9085257	2:9333806-9334539	Mo17	874	2:9085147-9085256	2:9085257-9085457	733	105	0.143247	TE-InDel	NonLTR/Tx1	GRMZM5G876898	68.4779	18.1866	0.922334	B73	indel-	7	7	14	0.022097	significant	indel-	consistent
b0229	Zm00001d002342	2	10613065	10616088	-	2:10616853-10616866	2:10459690-10459868	Mo17	765	2:10616654-10616853	2:10616866-10617046	178	127	0.713483	TE-InDel	DNA	GRMZM2G045596	40.9691	2.19041	0.725225	B73	indel-	6	5	11	0.835417	ns
b0231	Zm00001d002347	2	10657877	10658439	-	2:10659480-10659496	2:10677171-10677512	Mo17	1041	2:10659299-10659480	2:10659496-10659681	341	177	0.519062	TE-InDel	DNA/hAT	GRMZM2G345700	39.4208	11.1098	0.735563	B73	indel-	0	10	10
b0232	Zm00001d002347	2	10657877	10658439	-	2:10659893-10661149	2:10677943-10678062	B73	1454	2:10659719-10659893	2:10661149-10661343	1256	1256	1	TE-InDel	DNA/EnSpm/CACTA	GRMZM2G345700	39.4208	11.1098	0.735563	B73	indel+	6	9	15	0.000460646	significant	indel+	consistent
b0233	Zm00001d002373	2	11329158	11336821	+	2:11325832-11326116	2:11475948-11475957	B73	3042	2:11325634-11325832	2:11326116-11326315	284	283	0.996479	TE-InDel	DNA/PIF-Harbinger	GRMZM2G102000	23.2643	-3.53507	0.539041	MO17	indel-	9	7	16	0.067316	ns
b0234	Zm00001d002373	2	11329158	11336821	+	2:11326328-11327019	2:11476168-11476273	B73	2139	2:11326129-11326328	2:11327019-11327211	691	514	0.743849	TE-InDel	DNA/MuDR	GRMZM2G102000	23.2643	-3.53507	0.539041	MO17	indel-	9	7	16	0.29335	ns
b0236	Zm00001d002396	2	11915378	11934643	+	2:11912773-11912804	2:12130287-12131157	Mo17	2574	2:11912580-11912773	2:11912804-11913003	870	870	1	TE-InDel	DNA/PIF-Harbinger	GRMZM2G140328	31.5398	-4.8466	0.596352	MO17	indel+	8	7	15	0.488429	ns
b0237	Zm00001d002428	2	12420571	12421886	+	2:12416577-12419718	2:12745488-12745488	B73	853	2:12416378-12416577	2:12419718-12419913	3141	2581	0.821713	TE-InDel	DNA/Helitron	GRMZM2G000397	28.6435	-3.6292	0.606154	MO17	indel-	5	11	16	0.130646	ns
b0238	Zm00001d002450	2	12952260	12954772	-	2:12956210-12956656	2:13216085-13216133	B73	1438	2:12956017-12956210	2:12956656-12956855	446	150	0.336323	TE-InDel	DNA/TcMar-Stowaway	GRMZM2G149649	36.5983	10.5171	0.687885	B73	indel+	9	6	15	0.00827782	significant	indel+	consistent
b0239	Zm00001d002450	2	12952260	12954772	-	2:12957175-12957209	2:13216654-13217782	Mo17	2403	2:12956976-12957175	2:12957209-12957374	1128	1054	0.934397	TE-InDel	DNA/Helitron	GRMZM2G149649	36.5983	10.5171	0.687885	B73	indel-	4	2	6	0.0762239	ns
b0240	Zm00001d002450	2	12952260	12954772	-	2:12957394-12957695	2:13217973-13218046	B73	2622	2:12957209-12957394	2:12957695-12957823	301	129	0.428571	TE-InDel	DNA	GRMZM2G149649	36.5983	10.5171	0.687885	B73	indel+	2	14	16	0.352889	ns
b0244	Zm00001d002503	2	14159122	14168043	-	2:14168781-14168789	2:14534298-14534536	Mo17	738	2:14168582-14168781	2:14168789-14168986	238	189	0.794118	TE-InDel	DNA/MuDR	GRMZM2G032218	36.4633	-0.709937	0.673899	MO17	indel+	9	5	14	0.482692	ns
b0245	Zm00001d002503	2	14159122	14168043	-	2:14169462-14172588	2:14535203-14535223	B73	1419	2:14169267-14169462	2:14172588-14172784	3126	2019	0.645873	TE-InDel	DNA/MuDR	GRMZM2G032218	36.4633	-0.709937	0.673899	MO17	indel-	5	11	16	0.140471	ns
b0247	Zm00001d002545	2	15128166	15131434	-	2:15131596-15131970	2:15549795-15549798	B73	162	2:15131397-15131596	2:15131970-15132166	374	155	0.414439	TE-InDel	DNA/PIF-Harbinger	GRMZM2G421256	22.9537	0.28348	0.535702	B73	indel+	2	14	16	0.251555	ns
b0248	Zm00001d002545	2	15128166	15131434	-	2:15132165-15132166	2:15549989-15550270	Mo17	732	2:15131970-15132166	2:15132165-15132360	281	169	0.601423	TE-InDel	DNA/PIF-Harbinger	GRMZM2G421256	22.9537	0.28348	0.535702	B73	indel-	13	3	16	0.445854	ns
b0249	Zm00001d002548	2	15188664	15192121	-	2:15193673-15193684	2:15597656-15597841	Mo17	1552	2:15193528-15193673	2:15193684-15193872	185	125	0.675676	TE-InDel	DNA	GRMZM2G120724	47.0322	1.72756	0.71526	B73	indel-	3	8	11	0.0552528	ns
b0251	Zm00001d002589	2	16287469	16289962	-	2:16293459-16293553	2:16422608-16422958	Mo17	3497	2:16293289-16293459	2:16293553-16293749	350	17	0.0485714	TE-InDel	Simple_repeat	GRMZM2G164318	51.7892	0.819642	0.778289	B73	indel-	10	2	12	0.787962	ns
b0252	Zm00001d002611	2	16718233	16722717	-	2:16722806-16722816	2:16947522-16949953	Mo17	99	2:16722609-16722816	2:16722806-16723006	2431	622	0.255862	TE-InDel	Simple_repeat	GRMZM2G175728	69.9742	-3.82841	0.786595	MO17	indel+	5	10	15	0.714942	ns
b0253	Zm00001d002658	2	18550415	18564104	+	2:18549132-18549559	2:19013979-19014020	B73	856	2:18548933-18549132	2:18549559-18549755	427	272	0.637002	TE-InDel	DNA/PIF-Harbinger	GRMZM2G176647	41.1682	1.25917	0.738714	B73	indel+	6	10	16	0.0358682	significant	indel-	inconsistent
b0254	Zm00001d002671	2	18894011	18895354	-	2:18895959-18895961	2:19411753-19414403	Mo17	607	2:18895760-18895961	2:18895959-18896159	2650	415	0.156604	TE-InDel	LTR/Gypsy	GRMZM2G410728	24.4557	0.663352	0.544393	B73	indel-	1	13	14
b0256	Zm00001d002678	2	19071690	19082040	-	2:19082675-19083099	2:19642790-19642794	B73	635	2:19082506-19082675	2:19083099-19083300	424	364	0.858491	TE-InDel	DNA/PIF-Harbinger	GRMZM2G322819	40.4626	0.186428	0.679689	B73	indel+	4	12	16	0.00206753	significant	indel+	consistent	yes	0.00641895	0.936354
b0257	Zm00001d002736	2	20731283	20734451	+	2:20727712-20727716	2:21379395-21379521	Mo17	3571	2:20727527-20727716	2:20727712-20727912	126	120	0.952381	TE-InDel	DNA	GRMZM2G158657	23.4637	-0.184959	0.527489	MO17	indel+	11	4	15
b0258	Zm00001d002736	2	20731283	20734451	+	2:20729503-20729682	2:21381482-21381485	B73	1601	2:20729304-20729503	2:20729682-20729883	179	179	1	TE-InDel	DNA/PIF-Harbinger	GRMZM2G158657	23.4637	-0.184959	0.527489	MO17	indel-	2	14	16
b0259	Zm00001d002771	2	22167851	22169500	-	2:22169838-22169844	2:22315929-22316097	Mo17	344	2:22169649-22169844	2:22169838-22169993	168	56	0.333333	TE-InDel	Simple_repeat	AC212835.3_FG001	60.2799	-0.492965	0.850133	MO17	indel+	11	2	13	0.0789268	ns
b0260	Zm00001d002771	2	22167851	22169500	-	2:22170192-22170196	2:22316524-22320210	Mo17	696	2:22170025-22170196	2:22170192-22170387	3686	3659	0.992675	TE-InDel	DNA/hAT	AC212835.3_FG001	60.2799	-0.492965	0.850133	MO17	indel+	6	7	13	0.0107893	significant	indel+	consistent
b0261	Zm00001d003007	2	29298796	29300202	-	2:29301632-29301645	2:30359539-30359690	Mo17	1443	2:29301459-29301645	2:29301632-29301813	151	146	0.966887	TE-InDel	DNA	GRMZM2G178681	26.3417	2.16602	0.580038	B73	indel-	6	6	12	0.347906	ns
b0262	Zm00001d003013	2	29406645	29411158	-	2:29411895-29412032	2:30548153-30548156	B73	737	2:29411693-29411895	2:29412032-29412223	137	137	1	TE-InDel	LTR/Gypsy	GRMZM2G471931	35.0168	0.464364	0.704132	B73	indel+	3	13	16
b0263	Zm00001d003108	2	32464010	32470101	-	2:32470674-32470686	2:33798367-33798497	Mo17	585	2:32470483-32470686	2:32470674-32470880	130	130	1	TE-InDel	LTR/Copia	GRMZM2G170101	29.4082	11.5372	0.688687	B73	indel-	6	9	15	0.00910395	significant	indel-	consistent
b0264	Zm00001d003195	2	35306395	35307301	+	2:35305353-35305689	2:36248101-36248103	B73	706	2:35305195-35305353	2:35305689-35305890	336	327	0.973214	TE-InDel	DNA/Helitron	GRMZM2G018876	31.9329	-2.13638	0.616779	MO17	indel-	8	8	16	0.0424925	significant	indel-	consistent	yes	8.53541	0.00425704
b0265	Zm00001d003248	2	37818750	37828725	-	2:37828831-37828840	2:38621716-38622849	Mo17	115	2:37828641-37828840	2:37828831-37829031	1133	1133	1	TE-InDel	DNA	GRMZM2G102238	31.5924	-1.91325	0.732396	MO17	indel+	4	11	15	0.145245	ns
b0266	Zm00001d003248	2	37818750	37828725	-	2:37829817-37829960	2:38623855-38623871	B73	1092	2:37829618-37829817	2:37829960-37830159	143	116	0.811189	TE-InDel	DNA/PIF-Harbinger	GRMZM2G102238	31.5924	-1.91325	0.732396	MO17	indel-	9	7	16	0.436324	ns
b0267	Zm00001d003264	2	38333787	38335419	-	2:38337981-38338542	2:39334908-39334994	B73	2562	2:38337785-38337981	2:38338542-38338741	561	386	0.688057	TE-InDel	LTR/Copia	GRMZM2G045117	41.0715	0.686603	0.774308	B73	indel+	12	4	16	0.25556	ns
b0268	Zm00001d003322	2	40134430	40141796	-	2:40142121-40142647	2:41126284-41126301	B73	325	2:40141923-40142121	2:40142647-40142846	526	467	0.887833	TE-InDel	DNA/hAT	GRMZM2G165755	28.8176	1.85262	0.667891	B73	indel+	10	6	16	0.881766	ns
b0270	Zm00001d003404	2	43285525	43287246	+	2:43283951-43283997	2:44191367-44191547	Mo17	1528	2:43283765-43283951	2:43283997-43284174	180	159	0.883333	TE-InDel	DNA/MuDR	GRMZM2G414537	37.6974	0.54406	0.743117	B73	indel-	2	6	8	0.461883	ns
b0271	Zm00001d003404	2	43285525	43287246	+	2:43284171-43284174	2:44191718-44192123	Mo17	1354	2:43283997-43284174	2:43284171-43284373	405	405	1	TE-InDel	DNA/PIF-Harbinger	GRMZM2G414537	37.6974	0.54406	0.743117	B73	indel-	2	6	8	0.322413	ns
b0273	Zm00001d003462	2	45036162	45039212	+	2:45034688-45035731	2:45700727-45700730	B73	431	2:45034489-45034688	2:45035731-45035932	1043	337	0.323106	TE-InDel	DNA/PIF-Harbinger	GRMZM2G071714	64.3966	4.19393	0.880873	B73	indel+	5	11	16	0.665212	ns
b0274	Zm00001d003462	2	45036162	45039212	+	2:45036041-45036044	2:45701036-45701428	Mo17	121	2:45035845-45036044	2:45036041-45036232	392	390	0.994898	TE-InDel	DNA/PIF-Harbinger	GRMZM2G071714	64.3966	4.19393	0.880873	B73	indel-	1	15	16
b0275	Zm00001d003508	2	46235133	46238916	+	2:46231927-46232213	2:47200168-47200181	B73	2920	2:46231740-46231927	2:46232213-46232411	286	0	0	none-TE-InDel		GRMZM2G015844	51.9229	-0.415708	0.811091	MO17	indel-	7	9	16	0.197765	ns
b0277	Zm00001d003549	2	47683309	47684466	+	2:47681436-47681663	2:48421638-48421658	B73	1646	2:47681237-47681436	2:47681663-47681861	227	226	0.995595	TE-InDel	DNA/MuDR	GRMZM2G021831	25.6912	-0.352833	0.514534	MO17	indel-	2	14	16	0.51033	ns
b0278	Zm00001d003546	2	47674141	47682191	-	2:47682494-47682495	2:48422491-48423239	Mo17	303	2:47682299-47682494	2:47682495-47682695	748	744	0.994652	TE-InDel	DNA/PIF-Harbinger	GRMZM2G021464	52.5952	3.05988	0.772538	B73	indel-	8	7	15	0.0595573	ns
b0279	Zm00001d003546	2	47674141	47682191	-	2:47682915-47682917	2:48423662-48423949	Mo17	726	2:47682718-47682917	2:47682915-47683109	287	165	0.574913	TE-InDel	DNA/Helitron	GRMZM2G021464	52.5952	3.05988	0.772538	B73	indel-	8	7	15	0.0664394	ns
b0280	Zm00001d003602	2	49523237	49528762	+	2:49522091-49522093	2:50496567-50496686	Mo17	1146	2:49521896-49522093	2:49522091-49522206	119	0	0	none-TE-InDel		GRMZM2G016894	35.2746	4.25621	0.672709	B73	indel-	2	12	14	0.328217	ns
b0281	Zm00001d003797	2	59723085	59723552	-	2:59723746-59724349	2:60143981-60143983	B73	194	2:59723547-59723746	2:59724349-59724546	603	553	0.917081	TE-InDel	DNA/PIF-Harbinger	GRMZM2G146395	47.2718	-2.74418	0.798415	MO17	indel-	7	9	16	0.099816	ns
b0282	Zm00001d003797	2	59723085	59723552	-	2:59725154-59725155	2:60144791-60145008	Mo17	1603	2:59724956-59725155	2:59725154-59725356	217	199	0.917051	TE-InDel	DNA/Helitron	GRMZM2G146395	47.2718	-2.74418	0.798415	MO17	indel+	5	6	11	0.0200303	significant	indel+	consistent
b0283	Zm00001d003888	2	65275989	65278517	-	2:65279589-65280047	2:65933803-65933803	B73	1072	2:65279404-65279589	2:65280047-65280248	458	455	0.99345	TE-InDel	DNA/hAT	GRMZM2G170612	32.2302	0.679213	0.653374	B73	indel+	13	3	16	0.637903	ns
b0284	Zm00001d003895	2	65735275	65739011	+	2:65734132-65734718	2:66376120-66376219	B73	557	2:65733933-65734132	2:65734718-65734876	586	359	0.612628	TE-InDel	DNA/PIF-Harbinger	GRMZM2G123940	29.2164	-6.29801	0.567265	MO17	indel-	13	3	16	8.76841e-05	significant	indel-	consistent
b0285	Zm00001d003945	2	71037398	71040700	-	2:71041596-71041606	2:71556635-71557379	Mo17	906	2:71041403-71041606	2:71041596-71041793	744	723	0.971774	TE-InDel	DNA/hAT	GRMZM2G155281	21.8351	10.1893	0.510622	B73	indel-	1	7	8
b0286	Zm00001d003981	2	73518754	73519134	-	2:73519646-73521301	2:74322240-74322242	B73	512	2:73519447-73519646	2:73521301-73521502	1655	1655	1	TE-InDel	NonLTR/L1	GRMZM2G019056	24.9369	0.397796	0.525343	B73	indel+	7	9	16	0.205997	ns
b0288	Zm00001d004095	2	82544089	82547190	-	2:82547286-82547314	2:82985448-82985598	Mo17	96	2:82547087-82547286	2:82547314-82547441	150	106	0.706667	TE-InDel	DNA	GRMZM2G042893	25.3638	-0.318425	0.549198	MO17	indel+	6	9	15	0.000715576	significant	indel+	consistent
b0289	Zm00001d004506	2	115648626	115650787	-	2:115650993-115652137	2:116913974-116913986	B73	206	2:115650794-115650993	2:115652137-115652349	1144	1144	1	TE-InDel	DNA/Helitron	GRMZM2G168382	#N/A	#N/A	#N/A	#N/A	#N/A	4	12	16
b0290	Zm00001d004814	2	140902296	140903771	+	2:140902057-140902122	2:141458994-141459244	Mo17	174	2:140901901-140902057	2:140902122-140902321	250	249	0.996	TE-InDel	DNA/MuDR	GRMZM2G043226	36.3177	-0.508529	0.68358	MO17	indel+	4	11	15	0.0930581	ns
b0291	Zm00001d004924	2	149026476	149029096	-	2:149029569-149029572	2:150191421-150191726	Mo17	476	2:149029374-149029572	2:149029569-149029697	305	305	1	TE-InDel	DNA/PIF-Harbinger	GRMZM2G051738	26.2989	0.840708	0.560693	B73	indel-	4	3	7	0.183574	ns
b0292	Zm00001d004924	2	149026476	149029096	-	2:149030407-149030410	2:150192598-150192918	Mo17	1314	2:149030212-149030410	2:149030407-149030604	320	320	1	TE-InDel	DNA	GRMZM2G051738	26.2989	0.840708	0.560693	B73	indel-	2	11	13	0.323833	ns
b0293	Zm00001d004924	2	149026476	149029096	-	2:149030913-149031347	2:150193409-150193425	B73	1817	2:149030714-149030913	2:149031347-149031540	434	153	0.352535	TE-InDel	DNA/PIF-Harbinger	GRMZM2G051738	26.2989	0.840708	0.560693	B73	indel+	12	4	16	0.737938	ns
b0294	Zm00001d005451	2	174589103	174595166	+	2:174588342-174588345	2:174635310-174635438	Mo17	761	2:174588146-174588345	2:174588342-174588463	128	124	0.96875	TE-InDel	DNA/PIF-Harbinger	GRMZM2G028353	54.1621	10.8601	0.86287	B73	indel-	4	9	13	0.155158	ns
b0295	Zm00001d005451	2	174589103	174595166	+	2:174588461-174588463	2:174635559-174637430	Mo17	642	2:174588342-174588463	2:174588461-174588664	1871	1868	0.998397	TE-InDel	DNA/PIF-Harbinger	GRMZM2G028353	54.1621	10.8601	0.86287	B73	indel-	3	10	13	0.394485	ns
b0297	Zm00001d005587	2	179826385	179831450	+	2:179823603-179825509	2:179848150-179848159	B73	876	2:179823431-179823603	2:179825509-179825623	1906	1906	1	TE-InDel	DNA/MuDR	GRMZM2G062416	28.3096	-1.82343	0.62231	MO17	indel-	5	11	16	0.0453075	significant	indel-	consistent
b0299	Zm00001d005607	2	180548102	180551841	-	2:180553081-180553310	2:180501734-180501738	B73	1240	2:180552882-180553081	2:180553310-180553509	229	228	0.995633	TE-InDel	DNA/PIF-Harbinger	GRMZM2G177349	32.9596	0.656369	0.721153	B73	indel+	9	7	16	0.0166569	significant	indel-	inconsistent
b0300	Zm00001d005674	2	182914026	182928799	-	2:182929046-182929055	2:182978221-182978666	Mo17	256	2:182928847-182929055	2:182929046-182929245	445	444	0.997753	TE-InDel	DNA/hAT	GRMZM2G034848	46.4617	1.72902	0.851224	B73	indel-	7	7	14	0.0300903	significant	indel-	consistent	yes	34.1638	3.1885e-12
b0301	Zm00001d005674	2	182914026	182928799	-	2:182929519-182929522	2:182979458-182980088	Mo17	723	2:182929354-182929522	2:182929519-182929719	630	626	0.993651	TE-InDel	LTR/Gypsy	GRMZM2G034848	46.4617	1.72902	0.851224	B73	indel-	6	5	11	2.46475e-05	significant	indel-	consistent
b0302	Zm00001d005682	2	183194823	183197373	-	2:183198067-183198070	2:183199830-183199967	Mo17	697	2:183197868-183198070	2:183198067-183198266	137	136	0.992701	TE-InDel	LTR/Gypsy	GRMZM2G110412	27.5318	0.36012	0.605248	B73	indel-	2	12	14	0.280012	ns
b0303	Zm00001d005865	2	191165955	191167271	-	2:191167643-191167646	2:190935901-190936561	Mo17	375	2:191167448-191167646	2:191167643-191167750	660	660	1	TE-InDel	DNA/PIF-Harbinger	GRMZM2G134866	48.1706	0.737561	0.800259	B73	indel-	1	14	15
b0304	Zm00001d005871	2	191279063	191282059	-	2:191286413-191286414	2:191204265-191204682	Mo17	4354	2:191286214-191286413	2:191286414-191286614	417	414	0.992806	TE-InDel	DNA/hAT	GRMZM2G110107	26.6162	1.34868	0.548816	B73	indel-	7	4	11	0.568109	ns
b0305	Zm00001d005945	2	193506565	193507005	-	2:193508512-193508623	2:193375467-193375472	B73	1507	2:193508313-193508512	2:193508623-193508827	111	0	0	none-TE-InDel		GRMZM2G081529	41.8686	27.8104	0.750271	B73	indel+	9	7	16	0.478322	ns
b0309	Zm00001d005997	2	194951202	194954366	-	2:194956516-194956523	2:194783490-194784101	Mo17	2157	2:194956330-194956523	2:194956516-194956722	611	610	0.998363	TE-InDel	DNA/hAT	GRMZM2G003992	26.7947	1.1647	0.633218	B73	indel-	7	6	13	0.568258	ns
b0312	Zm00001d006010	2	195228750	195230170	+	2:195227310-195227750	2:194959045-194959059	B73	1000	2:195227139-195227310	2:195227750-195227934	440	209	0.475	TE-InDel	LTR/Copia	GRMZM2G080466	46.8648	173.618	0.828276	B73	indel+	13	3	16	0.31016	ns
b0313	Zm00001d006028	2	195579800	195583642	-	2:195584896-195584909	2:195466368-195466757	Mo17	1267	2:195584704-195584909	2:195584896-195585095	389	388	0.997429	TE-InDel	DNA/hAT	GRMZM2G126018	19.83	-1.02039	0.502195	MO17	indel+	6	5	11	0.1489	ns
b0314	Zm00001d006028	2	195579800	195583642	-	2:195586983-195587245	2:195468913-195468932	B73	3341	2:195586784-195586983	2:195587245-195587445	262	0	0	none-TE-InDel		GRMZM2G126018	19.83	-1.02039	0.502195	MO17	indel-	6	10	16	0.0408344	significant	indel-	consistent
b0315	Zm00001d006028	2	195579800	195583642	-	2:195587567-195587620	2:195469228-195469677	Mo17	3925	2:195587378-195587567	2:195587620-195587781	449	240	0.534521	TE-InDel	DNA/PIF-Harbinger	GRMZM2G126018	19.83	-1.02039	0.502195	MO17	indel+	10	4	14	0.121185	ns
b0316	Zm00001d006028	2	195579800	195583642	-	2:195587773-195587781	2:195469838-195470063	Mo17	4139	2:195587620-195587781	2:195587773-195587973	225	145	0.644444	TE-InDel	DNA/PIF-Harbinger	GRMZM2G126018	19.83	-1.02039	0.502195	MO17	indel+	11	5	16	0.0458212	significant	indel+	consistent
b0317	Zm00001d006070	2	197414822	197417429	-	2:197419758-197419984	2:196790343-196790345	B73	2329	2:197419559-197419758	2:197419984-197420184	226	224	0.99115	TE-InDel	DNA/MuDR	GRMZM2G013892	23.6949	-4.10743	0.587348	MO17	indel-	6	10	16	0.490325	ns
b0318	Zm00001d006102	2	198166081	198172199	-	2:198174043-198175237	2:197496218-197496225	B73	1844	2:198173849-198174043	2:198175237-198175430	1194	849	0.711055	TE-InDel	DNA/hAT	GRMZM2G179002	47.5663	2.13663	0.816965	B73	indel+	4	12	16	0.894019	ns
b0320	Zm00001d006117	2	199028000	199036096	-	2:199036268-199037442	2:198424478-198424487	B73	172	2:199036069-199036268	2:199037442-199037641	1174	1166	0.993186	TE-InDel	DNA/Helitron	GRMZM2G158721	#N/A	#N/A	#N/A	#N/A	#N/A	4	12	16	0.445422	ns
b0321	Zm00001d006130	2	199406737	199412468	-	2:199413265-199413269	2:198695213-198695942	Mo17	797	2:199413075-199413265	2:199413269-199413468	729	542	0.743484	TE-InDel	DNA/TcMar-Stowaway	GRMZM2G150503	41.3013	0.535747	0.793853	B73	indel-	7	5	12	0.671092	ns
b0322	Zm00001d006217	2	202081239	202085911	-	2:202086259-202086436	2:201352066-201352069	B73	348	2:202086155-202086259	2:202086436-202086640	177	172	0.971751	TE-InDel	DNA/Helitron	GRMZM2G063533	25.3897	0.248275	0.517979	B73	indel+	7	9	16	0.997008	ns
b0323	Zm00001d006217	2	202081239	202085911	-	2:202087223-202088199	2:201352643-201352644	B73	1312	2:202087111-202087223	2:202088199-202088394	976	815	0.835041	TE-InDel	DNA/hAT	GRMZM2G063533	25.3897	0.248275	0.517979	B73	indel+	7	9	16	0.997008	ns
b0324	Zm00001d006238	2	202615728	202622663	-	2:202623854-202623857	2:201939662-201939982	Mo17	1194	2:202623666-202623857	2:202623854-202623977	320	319	0.996875	TE-InDel	DNA/PIF-Harbinger	GRMZM2G050193	19.2076	2.77736	0.511548	B73	indel-	1	14	15
b0325	Zm00001d006256	2	202903835	202904632	+	2:202899223-202899230	2:202261542-202262057	Mo17	4612	2:202899023-202899230	2:202899223-202899423	515	511	0.992233	TE-InDel	DNA/hAT	GRMZM2G409722	48.6382	-0.457176	0.868217	MO17	indel+	4	12	16	0.246827	ns
b0326	Zm00001d006256	2	202903835	202904632	+	2:202903085-202903237	2:202265894-202265902	B73	598	2:202902886-202903085	2:202903237-202903437	152	107	0.703947	TE-InDel	DNA/Helitron	GRMZM2G409722	48.6382	-0.457176	0.868217	MO17	indel-	5	11	16	0.476921	ns
b0328	Zm00001d006270	2	203313532	203322278	-	2:203322537-203324790	2:202451240-202451253	B73	259	2:203322338-203322537	2:203324790-203324990	2253	2253	1	TE-InDel	LINE/L1	GRMZM2G158629	42.3731	1.71597	0.707588	B73	indel+	5	11	16	0.925886	ns
b0329	Zm00001d006347	2	205253494	205257434	+	2:205248866-205252527	2:203975089-203975107	B73	967	2:205248667-205248866	2:205252527-205252712	3661	2550	0.696531	TE-InDel	DNA/PIF-Harbinger	GRMZM2G004784	24.814	-1.3426	0.556487	MO17	indel-	6	10	16	0.15215	ns
b0330	Zm00001d006347	2	205253494	205257434	+	2:205252806-205252813	2:203975406-203976021	Mo17	688	2:205252642-205252813	2:205252806-205252926	615	604	0.982114	TE-InDel	DNA/hAT	GRMZM2G004784	24.814	-1.3426	0.556487	MO17	indel+	2	7	9	0.734552	ns
b0332	Zm00001d006358	2	205687911	205689836	+	2:205683035-205683613	2:204339425-204339463	B73	4298	2:205682836-205683035	2:205683613-205683812	578	429	0.742215	TE-InDel	LTR/Gypsy	GRMZM2G172945	23.3805	2.92097	0.518752	B73	indel+	7	8	15	0.682151	ns
b0333	Zm00001d006358	2	205687911	205689836	+	2:205685514-205687105	2:204341331-204341343	B73	806	2:205685315-205685514	2:205687105-205687305	1591	1581	0.993715	TE-InDel	LINE/L1	GRMZM2G172945	23.3805	2.92097	0.518752	B73	indel+	8	8	16	0.321508	ns
b0334	Zm00001d006358	2	205687911	205689836	+	2:205687759-205687762	2:204341992-204342580	Mo17	152	2:205687567-205687762	2:205687759-205687955	588	473	0.804422	TE-InDel	DNA/PIF-Harbinger	GRMZM2G172945	23.3805	2.92097	0.518752	B73	indel-	2	13	15	0.204242	ns
b0335	Zm00001d006408	2	206925694	206933192	+	2:206923498-206924939	2:205401639-205401642	B73	755	2:206923299-206923498	2:206924939-206925139	1441	1441	1	TE-InDel	DNA/PIF-Harbinger	GRMZM2G171880	35.0894	1.23359	0.685934	B73	indel+	9	7	16	0.542013	ns
b0336	Zm00001d006408	2	206925694	206933192	+	2:206925637-206925645	2:205402345-205402726	Mo17	57	2:206925446-206925645	2:206925637-206925832	381	380	0.997375	TE-InDel	DNA/hAT	GRMZM2G171880	35.0894	1.23359	0.685934	B73	indel-	3	8	11	0.340616	ns
b0337	Zm00001d006440	2	208245555	208249764	-	2:208250182-208250317	2:206738742-206738760	B73	418	2:208249983-208250182	2:208250317-208250519	135	104	0.77037	TE-InDel	DNA/PIF-Harbinger	GRMZM2G171613	39.5372	4.41694	0.663762	B73	indel+	7	8	15	0.840993	ns
b0338	Zm00001d006457	2	208849437	208854779	-	2:208854895-208854904	2:207323252-207324470	Mo17	125	2:208854706-208854904	2:208854895-208855095	1218	1218	1	TE-InDel	DNA/MuDR	GRMZM2G179505	25.6641	1.54328	0.52926	B73	indel-	0	11	11
b0339	Zm00001d006457	2	208849437	208854779	-	2:208855403-208855416	2:207324991-207325389	Mo17	637	2:208855214-208855416	2:208855403-208855612	398	389	0.977387	TE-InDel	DNA/hAT	GRMZM2G179505	25.6641	1.54328	0.52926	B73	indel-	6	10	16	0.011276	significant	indel-	consistent
b0340	Zm00001d006461	2	208886176	208891521	-	2:208892317-208895920	2:207407571-207407584	B73	796	2:208892215-208892317	2:208895920-208896099	3603	3148	0.873716	TE-InDel	DNA/Helitron	GRMZM2G179459	76.4043	9.79114	0.907939	B73	indel+	13	3	16	0.0134612	significant	indel+	consistent
b0341	Zm00001d006495	2	209834003	209834296	+	2:209831945-209831951	2:208070211-208071460	Mo17	2058	2:209831773-209831951	2:209831945-209832145	1249	763	0.610889	TE-InDel	DNA/hAT	GRMZM2G470103	43.7833	0.556941	0.763701	B73	indel-	3	10	13	0.1873	ns
b0342	Zm00001d006495	2	209834003	209834296	+	2:209832195-209832196	2:208071705-208071888	Mo17	1807	2:209831996-209832195	2:209832196-209832396	183	0	0	none-TE-InDel		GRMZM2G470103	43.7833	0.556941	0.763701	B73	indel-	2	10	12	0.36029	ns
b0343	Zm00001d006496	2	209838117	209842773	+	2:209838004-209838038	2:208145128-208147627	Mo17	79	2:209837896-209838004	2:209838038-209838205	2499	2473	0.989596	TE-InDel	Simple_repeat	GRMZM2G169615	52.6156	6.58084	0.839105	B73	indel-	4	12	16	0.00489354	significant	indel-	consistent
b0344	Zm00001d006508	2	210172903	210177759	+	2:210172804-210172806	2:208511528-208511833	Mo17	99	2:210172619-210172806	2:210172804-210172998	305	305	1	TE-InDel	DNA/Mariner	GRMZM2G125495	50.7053	-2.17191	0.866853	MO17	indel+	4	10	14	9.96644e-06	significant	indel+	consistent	yes	NaN	NaN
b0345	Zm00001d006539	2	210700847	210703733	+	2:210696272-210696272	2:208975226-208975548	Mo17	4575	2:210696073-210696272	2:210696272-210696472	322	318	0.987578	TE-InDel	DNA/PIF-Harbinger	GRMZM5G803981	26.6633	-0.268838	0.561463	MO17	indel+	5	10	15
b0346	Zm00001d006562	2	210984967	210987670	-	2:210987945-210992270	2:209284133-209284133	B73	275	2:210987746-210987945	2:210992270-210992470	4325	1452	0.335723	TE-InDel	DNA	GRMZM2G063263	34.1115	1.81104	0.67519	B73	indel+	5	11	16	0.804627	ns
b0350	Zm00001d006621	2	212770259	212774000	-	2:212776484-212776579	2:211185476-211185851	Mo17	2484	2:212776285-212776484	2:212776579-212776766	375	309	0.824	TE-InDel	DNA/PIF-Harbinger	GRMZM2G099425	43.2785	1.2641	0.823177	B73	indel-	3	11	14	0.299925	ns
b0351	Zm00001d006626	2	212800974	212802361	-	2:212802835-212802864	2:211238066-211238730	Mo17	474	2:212802636-212802835	2:212802864-212803060	664	309	0.465361	TE-InDel	DNA/PIF-Harbinger	GRMZM2G099239	23.1594	-2.4719	0.532578	MO17	indel+	9	5	14	0.412811	ns
b0352	Zm00001d006626	2	212800974	212802361	-	2:212803231-212803234	2:211239101-211239334	Mo17	873	2:212803039-212803234	2:212803231-212803409	233	230	0.987124	TE-InDel	DNA	GRMZM2G099239	23.1594	-2.4719	0.532578	MO17	indel+	6	2	8	0.0326887	significant	indel-	inconsistent
b0353	Zm00001d006626	2	212800974	212802361	-	2:212803409-212804234	2:211239508-211239513	B73	1048	2:212803231-212803409	2:212804234-212804412	825	303	0.367273	TE-InDel	DNA/hAT	GRMZM2G099239	23.1594	-2.4719	0.532578	MO17	indel-	1	15	16
b0354	Zm00001d006626	2	212800974	212802361	-	2:212805100-212805106	2:211240278-211241108	Mo17	2745	2:212804908-212805106	2:212805100-212805300	830	793	0.955422	TE-InDel	DNA/hAT	GRMZM2G099239	23.1594	-2.4719	0.532578	MO17	indel+	6	1	7
b0355	Zm00001d006638	2	213100782	213104544	+	2:213096339-213097345	2:211528286-211528291	B73	3437	2:213096144-213096339	2:213097345-213097545	1006	870	0.864811	TE-InDel	DNA/EnSpm/CACTA	GRMZM2G042660	67.5075	-1.38459	0.902475	MO17	indel-	13	3	16	0.615521	ns
b0356	Zm00001d006701	2	214683529	214685193	+	2:214678906-214679456	2:212778893-212778933	B73	4073	2:214678728-214678906	2:214679456-214679618	550	0	0	none-TE-InDel		GRMZM2G431309	#N/A	#N/A	#N/A	#N/A	#N/A	7	9	16	0.253007	ns
b0357	Zm00001d006701	2	214683529	214685193	+	2:214681835-214682350	2:212781351-212781356	B73	1179	2:214681640-214681835	2:214682350-214682548	515	42	0.0815534	TE-InDel	Simple_repeat	GRMZM2G431309	#N/A	#N/A	#N/A	#N/A	#N/A	6	10	16	0.272889	ns
b0358	Zm00001d006759	2	216115940	216121521	-	2:216121814-216121815	2:214376049-214376151	Mo17	293	2:216121615-216121814	2:216121815-216122002	102	0	0	none-TE-InDel		GRMZM2G113512	41.4716	1.82317	0.82811	B73	indel-	9	6	15	0.700608	ns
b0359	Zm00001d006759	2	216115940	216121521	-	2:216122071-216122667	2:214376418-214376421	B73	550	2:216121882-216122071	2:216122667-216122868	596	596	1	TE-InDel	DNA/PIF-Harbinger	GRMZM2G113512	41.4716	1.82317	0.82811	B73	indel+	10	6	16	0.993003	ns
b0360	Zm00001d006771	2	216363908	216366486	+	2:216362790-216362796	2:214843618-214844686	Mo17	1118	2:216362594-216362796	2:216362790-216362977	1068	847	0.793071	TE-InDel	LTR/Copia	GRMZM2G016106	57.5612	3.44665	0.743498	B73	indel-	9	5	14	0.000652928	significant	indel-	consistent
b0361	Zm00001d006874	2	218323951	218325168	+	2:218321604-218321609	2:217042006-217042175	Mo17	2342	2:218321405-218321604	2:218321609-218321805	169	168	0.994083	TE-InDel	DNA/EnSpm/CACTA	GRMZM2G125004	43.3647	1.99812	0.739124	B73	indel-	4	9	13	0.788544	ns
b0362	Zm00001d006874	2	218323951	218325168	+	2:218323527-218323853	2:217045411-217045414	B73	98	2:218323332-218323527	2:218323853-218324052	326	326	1	TE-InDel	DNA/EnSpm/CACTA	GRMZM2G125004	43.3647	1.99812	0.739124	B73	indel+	5	11	16	0.242203	ns
b0363	Zm00001d006885	2	218537811	218543707	-	2:218543831-218543840	2:217269896-217270052	Mo17	133	2:218543630-218543840	2:218543831-218544030	156	145	0.929487	TE-InDel	DNA/Helitron	GRMZM2G056612	67.2997	3.99171	0.951743	B73	indel-	1	11	12
b0364	Zm00001d006930	2	219607348	219608151	+	2:219605512-219605514	2:218426019-218426488	Mo17	1836	2:219605324-219605514	2:219605512-219605712	469	370	0.788913	TE-InDel	DNA/PIF-Harbinger	GRMZM2G075744	58.1725	4.1424	0.89282	B73	indel-	3	1	4
b0365	Zm00001d007067	2	221307113	221311112	-	2:221313399-221313404	2:220391790-220397035	Mo17	2292	2:221313205-221313404	2:221313399-221313599	5245	5244	0.999809	TE-InDel	LTR/Gypsy	GRMZM2G172138	53.522	4.35066	0.813724	B73	indel-	1	15	16
b0366	Zm00001d007077	2	221760272	221762560	+	2:221757914-221757918	2:220638905-220639192	Mo17	2358	2:221757721-221757918	2:221757914-221758056	287	287	1	TE-InDel	DNA/PIF-Harbinger	GRMZM2G159041	21.6138	0.649973	0.537373	B73	indel-	0	11	11
b0367	Zm00001d007082	2	221854961	221859498	-	2:221861614-221861621	2:220812559-220813992	Mo17	2123	2:221861423-221861621	2:221861614-221861772	1433	1044	0.728542	TE-InDel	DNA/hAT	GRMZM2G163826	35.7642	0.549147	0.539869	B73	indel-	1	7	8
b0368	Zm00001d007085	2	221916956	221920555	-	2:221921133-221921142	2:220893465-220893800	Mo17	587	2:221920987-221921142	2:221921133-221921337	335	222	0.662687	TE-InDel	DNA/PIF-Harbinger	GRMZM2G440459	20.7244	0.504365	0.49885	B73	indel-	7	6	13	0.519667	ns
b0369	Zm00001d007100	2	222255509	222256819	-	2:222257038-222257217	2:221233622-221233626	B73	219	2:222256839-222257038	2:222257217-222257395	179	0	0	none-TE-InDel		GRMZM2G030148	34.8526	0.397918	0.612335	B73	indel+	5	11	16	0.16354	ns
b0371	Zm00001d007105	2	222362512	222364930	-	2:222365100-222365385	2:221298332-221298336	B73	170	2:222364904-222365100	2:222365385-222365582	285	197	0.691228	TE-InDel	DNA/Helitron	GRMZM2G131554	62.2406	6.98289	0.8951	B73	indel+	3	13	16	0.0347158	significant	indel+	consistent
b0372	Zm00001d007105	2	222362512	222364930	-	2:222368854-222368859	2:221301829-221301981	Mo17	3924	2:222368655-222368854	2:222368859-222369058	152	0	0	none-TE-InDel		GRMZM2G131554	62.2406	6.98289	0.8951	B73	indel-	0	7	7
b0373	Zm00001d007130	2	222969311	222970868	+	2:222968605-222968608	2:221797149-221797848	Mo17	706	2:222968406-222968608	2:222968605-222968805	699	351	0.502146	TE-InDel	DNA/Helitron	GRMZM2G123486	60.0569	-7.44036	0.857168	MO17	indel+	10	4	14	0.0256972	significant	indel-	inconsistent
b0374	Zm00001d007145	2	223322274	223324776	-	2:223324963-223324968	2:222066126-222066703	Mo17	187	2:223324778-223324963	2:223324968-223325147	577	566	0.980936	TE-InDel	DNA/PIF-Harbinger	GRMZM2G009876	38.7344	4.01802	0.689018	B73	indel-	1	10	11
b0375	Zm00001d007145	2	223322274	223324776	-	2:223325868-223326038	2:222067594-222067597	B73	1092	2:223325669-223325868	2:223326038-223326238	170	169	0.994118	TE-InDel	DNA/PIF-Harbinger	GRMZM2G009876	38.7344	4.01802	0.689018	B73	indel+	5	11	16	0.150611	ns
b0376	Zm00001d007145	2	223322274	223324776	-	2:223327133-223327249	2:222068687-222068690	B73	2357	2:223326934-223327133	2:223327249-223327449	116	116	1	TE-InDel	DNA/Helitron	GRMZM2G009876	38.7344	4.01802	0.689018	B73	indel+	5	11	16	0.150611	ns
b0377	Zm00001d007181	2	223926017	223926628	+	2:223925380-223925394	2:222673511-222676365	Mo17	637	2:223925202-223925394	2:223925380-223925574	2854	2853	0.99965	TE-InDel	LINE/L1	GRMZM2G031329	27.1099	0.423309	0.566981	B73	indel-	3	7	10	0.698283	ns
b0379	Zm00001d007195	2	224443511	224453697	-	2:224454455-224454460	2:223184849-223189555	Mo17	763	2:224454255-224454460	2:224454455-224454655	4706	2811	0.597323	TE-InDel	LTR/Copia	GRMZM2G097277	50.8851	1.4167	0.811669	B73	indel-	1	13	14
b0380	Zm00001d007195	2	224443511	224453697	-	2:224457207-224457213	2:223192291-223192986	Mo17	3516	2:224457008-224457213	2:224457207-224457406	695	681	0.979856	TE-InDel	LTR/Gypsy	GRMZM2G097277	50.8851	1.4167	0.811669	B73	indel-	2	12	14	0.0271086	significant	indel-	consistent	yes	NaN	NaN
b0381	Zm00001d007195	2	224443511	224453697	-	2:224458390-224458392	2:223194166-223194413	Mo17	4695	2:224458199-224458392	2:224458390-224458570	247	106	0.42915	TE-InDel	DNA/Helitron	GRMZM2G097277	50.8851	1.4167	0.811669	B73	indel-	6	6	12	0.11752	ns
b0383	Zm00001d007360	2	229671848	229673506	+	2:229669471-229669472	2:228305876-228306200	Mo17	2376	2:229669304-229669471	2:229669472-229669672	324	320	0.987654	TE-InDel	DNA/PIF-Harbinger	GRMZM2G319947	#N/A	#N/A	#N/A	#N/A	#N/A	4	8	12	0.763162	ns
b0384	Zm00001d007360	2	229671848	229673506	+	2:229670178-229670181	2:228306914-228307042	Mo17	1670	2:229669984-229670181	2:229670178-229670365	128	127	0.992188	TE-InDel	DNA/PIF-Harbinger	GRMZM2G319947	#N/A	#N/A	#N/A	#N/A	#N/A	3	7	10	0.317758	ns
b0386	Zm00001d007360	2	229671848	229673506	+	2:229671054-229671056	2:228307780-228307918	Mo17	794	2:229670864-229671056	2:229671054-229671176	138	138	1	TE-InDel	LTR/Copia	GRMZM2G319947	#N/A	#N/A	#N/A	#N/A	#N/A	1	15	16
b0387	Zm00001d007594	2	235874042	235877637	-	2:235877754-235877765	2:233978276-233979097	Mo17	117	2:235877556-235877754	2:235877765-235877964	821	647	0.788063	TE-InDel	DNA/PIF-Harbinger	GRMZM2G078638	44.3426	4.02227	0.801548	B73	indel-	5	9	14	0.30228	ns
b0388	Zm00001d007599	2	235977763	235983846	+	2:235977733-235977736	2:234107535-234107893	Mo17	30	2:235977538-235977736	2:235977733-235977933	358	358	1	TE-InDel	LTR/Gypsy	GRMZM2G445163	29.565	1.20044	0.610836	B73	indel-	3	8	11	0.842797	ns
b0389	Zm00001d007698	2	237616103	237632350	-	2:237632596-237633124	2:236280148-236280151	B73	246	2:237632397-237632596	2:237633124-237633321	528	477	0.903409	TE-InDel	DNA/PIF-Harbinger	GRMZM2G052403	37.2582	2.52638	0.830862	B73	indel+	7	9	16	0.0693253	ns
b0390	Zm00001d007698	2	237616103	237632350	-	2:237635255-237635392	2:236280774-236280777	B73	2905	2:237635053-237635255	2:237635392-237635591	137	137	1	TE-InDel	LTR/Gypsy	GRMZM2G052403	37.2582	2.52638	0.830862	B73	indel+	5	11	16	0.310146	ns
b0392	Zm00001d007768	2	239284190	239287487	+	2:239279837-239279977	2:238511365-238511367	B73	4213	2:239279638-239279837	2:239279977-239280177	140	139	0.992857	TE-InDel	DNA/hAT	GRMZM2G008898	50.1753	2.34701	0.832545	B73	indel+	6	10	16	0.49821	ns
b0393	Zm00001d007768	2	239284190	239287487	+	2:239280688-239280696	2:238512085-238512677	Mo17	3502	2:239280497-239280696	2:239280688-239280888	592	592	1	TE-InDel	DNA/PIF-Harbinger	GRMZM2G008898	50.1753	2.34701	0.832545	B73	indel-	2	11	13	0.485023	ns
b0394	Zm00001d007802	2	239888037	239893817	-	2:239895367-239896200	2:239085804-239085812	B73	1550	2:239895168-239895367	2:239896200-239896400	833	434	0.521008	TE-InDel	DNA/hAT	GRMZM2G082809	27.1803	-1.51272	0.644497	MO17	indel-	2	14	16	0.680053	ns
b0395	Zm00001d007825	2	240363028	240369553	+	2:240360528-240360734	2:239438838-239438863	B73	2294	2:240360406-240360528	2:240360734-240360912	206	174	0.84466	TE-InDel	DNA/hAT	GRMZM2G117226	71.303	2.26039	0.931358	B73	indel+	8	8	16	0.02144	significant	indel+	consistent
b0396	Zm00001d007825	2	240363028	240369553	+	2:240362852-240362856	2:239441024-239441215	Mo17	176	2:240362653-240362856	2:240362852-240363052	191	191	1	TE-InDel	DNA/PIF-Harbinger	GRMZM2G117226	71.303	2.26039	0.931358	B73	indel-	3	10	13	0.166344	ns
b0397	Zm00001d039263	3	765433	766898	-	3:769156-769162	3:1679385-1680525	Mo17	2264	3:768963-769162	3:769156-769356	1140	1140	1	TE-InDel	LTR/Copia	GRMZM5G825437	32.6656	4.16049	0.656679	B73	indel-	2	12	14	0.736663	ns
b0399	Zm00001d039266	3	826815	835054	-	3:835088-835334	3:1739461-1739469	B73	34	3:834889-835088	3:835334-835527	246	153	0.621951	TE-InDel	DNA/MuDR	GRMZM2G475305	34.9128	1.18247	0.662979	B73	indel+	7	9	16	0.0401136	significant	indel-	inconsistent
b0400	Zm00001d039301	3	1325146	1327618	+	3:1324031-1324151	3:2551525-2551528	B73	995	3:1323826-1324031	3:1324151-1324342	120	0	0	none-TE-InDel		GRMZM2G099678	39.3234	-15.7297	0.682739	MO17	indel-	7	8	15	0.433109	ns
b0402	Zm00001d039338	3	2050951	2052284	-	3:2052594-2052596	3:3402914-3403109	Mo17	312	3:2052412-2052596	3:2052594-2052755	195	195	1	TE-InDel	DNA	GRMZM2G114044	26.4845	0.265124	0.554102	B73	indel-	2	9	11	0.835638	ns
b0403	Zm00001d039348	3	2277773	2281085	-	3:2284134-2284305	3:3686744-3686754	B73	3049	3:2284007-2284134	3:2284305-2284504	171	55	0.321637	TE-InDel	DNA	GRMZM2G026868	43.4435	3.79668	0.752424	B73	indel+	11	5	16	0.189384	ns
b0404	Zm00001d039427	3	3979996	3984914	-	3:3988144-3988291	3:5231497-5231497	B73	3230	3:3987943-3988144	3:3988291-3988480	147	0	0	none-TE-InDel		GRMZM2G055334	30.1995	-2.08275	0.66508	MO17	indel-	15	1	16
b0405	Zm00001d039448	3	4599630	4609909	-	3:4609977-4610001	3:5753767-5756072	Mo17	68	3:4609778-4609977	3:4610001-4610199	2305	2251	0.976573	TE-InDel	Simple_repeat	GRMZM2G133314	30.7558	1.24387	0.649819	B73	indel-	7	7	14	0.634401	ns
b0410	Zm00001d039624	3	9366940	9370004	+	3:9363729-9364956	3:11090636-11090680	B73	1984	3:9363530-9363729	3:9364956-9365113	1227	1227	1	TE-InDel	Simple_repeat	GRMZM2G004696	43.2393	3.77012	0.633516	B73	indel+	7	9	16	0.892682	ns
b0411	Zm00001d039624	3	9366940	9370004	+	3:9365857-9366794	3:11091615-11091624	B73	146	3:9365658-9365857	3:9366794-9366991	937	632	0.674493	TE-InDel	DNA/hAT	GRMZM2G004696	43.2393	3.77012	0.633516	B73	indel+	12	4	16	0.156743	ns
b0412	Zm00001d039710	3	12751564	12753836	+	3:12747547-12747703	3:14411779-14411785	B73	3861	3:12747384-12747547	3:12747703-12747908	156	156	1	TE-InDel	DNA/Helitron	GRMZM2G159145	28.3694	1.56492	0.644999	B73	indel+	3	13	16	0.498615	ns
b0414	Zm00001d039790	3	14754274	14754684	-	3:14755784-14756021	3:16249798-16249800	B73	1100	3:14755588-14755784	3:14756021-14756220	237	220	0.92827	TE-InDel	DNA/PIF-Harbinger	GRMZM2G401581	52.0913	39.6087	0.785439	B73	indel+	7	8	15	0.151023	ns
b0416	Zm00001d039918	3	19350843	19355642	+	3:19348744-19350617	3:20681529-20681536	B73	226	3:19348545-19348744	3:19350617-19350823	1873	1763	0.941271	TE-InDel	DNA/hAT	GRMZM2G169152	30.0776	1.53113	0.567727	B73	indel+	4	12	16	0.106919	ns
b0417	Zm00001d039991	3	22050506	22051063	-	3:22053383-22053389	3:23640853-23641908	Mo17	2320	3:22053185-22053383	3:22053389-22053578	1055	546	0.517536	TE-InDel	DNA/PIF-Harbinger	GRMZM2G032107	54.589	6.90228	0.87169	B73	indel-	8	4	12	0.0106405	significant	indel-	consistent
b0419	Zm00001d040129	3	28668662	28677463	-	3:28677576-28677630	3:30228659-30230879	Mo17	113	3:28677377-28677576	3:28677630-28677828	2220	2118	0.954054	TE-InDel	DNA/Helitron	GRMZM2G082780	30.7633	-0.536899	0.582818	MO17	indel+	7	9	16	0.0220465	significant	indel+	consistent
b0420	Zm00001d040129	3	28668662	28677463	-	3:28678093-28678101	3:30231351-30233199	Mo17	638	3:28677898-28678101	3:28678093-28678246	1848	1465	0.792749	TE-InDel	DNA/hAT	GRMZM2G082780	30.7633	-0.536899	0.582818	MO17	indel+	6	9	15	0.0416066	significant	indel+	consistent
b0421	Zm00001d040158	3	29625662	29626648	-	3:29628812-29629322	3:31176685-31176686	B73	2164	3:29628629-29628812	3:29629322-29629523	510	507	0.994118	TE-InDel	DNA/PIF-Harbinger	GRMZM2G079807	55.622	-0.976066	0.844891	MO17	indel-	7	9	16	0.265471	ns
b0422	Zm00001d040190	3	31509737	31513060	-	3:31513550-31513890	3:33008087-33008092	B73	490	3:31513351-31513550	3:31513890-31514090	340	340	1	TE-InDel	DNA/PIF-Harbinger	GRMZM2G120304	25.5859	-12.339	0.519881	MO17	indel-	3	13	16	0.189747	ns
b0423	Zm00001d040192	3	31627408	31630769	+	3:31626424-31626991	3:33085735-33085746	B73	417	3:31626225-31626424	3:31626991-31627155	567	567	1	TE-InDel	DNA/hAT	GRMZM2G049895	46.4337	-5.83522	0.838455	MO17	indel-	5	11	16	0.558085	ns
b0424	Zm00001d040197	3	31705710	31707058	-	3:31707461-31708698	3:33227095-33227105	B73	403	3:31707262-31707461	3:31708698-31708907	1237	1237	1	TE-InDel	DNA/MuDR	GRMZM2G083150	44.4112	0.624913	0.847778	B73	indel+	7	9	16	0.00816656	significant	indel+	consistent	yes	35.2418	3.1535e-08
b0425	Zm00001d040220	3	32671215	32675049	-	3:32675134-32675141	3:34230496-34231018	Mo17	92	3:32674956-32675141	3:32675134-32675325	522	522	1	TE-InDel	DNA/hAT	GRMZM2G111164	42.1305	2.20738	0.690245	B73	indel-	7	7	14	0.180121	ns
b0427	Zm00001d040238	3	33378958	33381861	+	3:33378660-33378664	3:35122260-35122668	Mo17	298	3:33378529-33378664	3:33378660-33378863	408	261	0.639706	TE-InDel	DNA/PIF-Harbinger	GRMZM2G134149	30.0887	1.13155	0.655836	B73	indel-	2	10	12	0.597905	ns
b0428	Zm00001d040302	3	36669164	36675206	-	3:36676514-36676522	3:38151754-38152121	Mo17	1316	3:36676330-36676522	3:36676514-36676714	367	366	0.997275	TE-InDel	DNA/hAT	GRMZM2G086994	39.2852	-1.96359	0.764279	MO17	indel+	4	8	12	0.0621904	ns
b0429	Zm00001d040302	3	36669164	36675206	-	3:36677681-36678341	3:38153281-38153293	B73	2475	3:36677481-36677681	3:36678341-36678540	660	660	1	TE-InDel	DNA/hAT	GRMZM2G086994	39.2852	-1.96359	0.764279	MO17	indel-	3	13	16	0.253205	ns
b0430	Zm00001d040303	3	36817316	36823842	+	3:36815245-36815285	3:38289509-38290076	Mo17	2031	3:36815114-36815245	3:36815285-36815429	567	325	0.573192	TE-InDel	DNA/Helitron	GRMZM2G074381	29.3693	-0.373239	0.621806	MO17	indel+	3	12	15	0.830883	ns
b0431	Zm00001d040305	3	36893536	36902030	-	3:36903845-36903852	3:38391598-38391832	Mo17	1815	3:36903647-36903845	3:36903852-36904040	234	147	0.628205	TE-InDel	DNA/PIF-Harbinger	GRMZM2G145756	36.2666	4.3183	0.695812	B73	indel-	5	7	12	0.127743	ns
b0432	Zm00001d040357	3	39649104	39653644	-	3:39654525-39658057	3:40924746-40924751	B73	881	3:39654326-39654525	3:39658057-39658257	3532	3373	0.954983	TE-InDel	LTR/Gypsy	GRMZM2G419085	33.1777	-1.75859	0.636004	MO17	indel-	3	13	16	0.0099621	significant	indel-	consistent
b0434	Zm00001d040389	3	41017675	41024229	-	3:41027296-41027302	3:42581409-42581570	Mo17	3073	3:41027103-41027302	3:41027296-41027503	161	155	0.962733	TE-InDel	DNA/hAT	GRMZM2G040069	22.4395	-3.90179	0.554519	MO17	indel+	2	8	10	0.650752	ns
b0435	Zm00001d040517	3	47815613	47816293	+	3:47813939-47814968	3:49916875-49916880	B73	645	3:47813735-47813939	3:47814968-47815162	1029	1012	0.983479	TE-InDel	LTR/Copia	GRMZM2G154078	23.7348	0.307326	0.545197	B73	indel+	4	12	16	0.760088	ns
b0436	Zm00001d040804	3	66959532	66964277	-	3:66964810-66965817	3:69670924-69670924	B73	533	3:66964626-66964810	3:66965817-66966018	1007	1007	1	TE-InDel	DNA/Helitron	GRMZM2G383154	33.016	1.59948	0.669005	B73	indel+	3	13	16	8.49471e-06	significant	indel+	consistent	yes	26.0102	5.72941e-06
b0437	Zm00001d040831	3	68533978	68545245	-	3:68546108-68546110	3:71162041-71162346	Mo17	865	3:68545913-68546110	3:68546108-68546308	305	305	1	TE-InDel	DNA/PIF-Harbinger	GRMZM2G010085	36.4625	6.87509	0.744719	B73	indel-	6	8	14	0.145884	ns
b0438	Zm00001d041112	3	98130861	98139735	-	3:98139894-98139899	3:100350415-100350645	Mo17	164	3:98139700-98139899	3:98139894-98140094	230	223	0.969565	TE-InDel	DNA/PIF-Harbinger	GRMZM2G086882	22.425	-4.77987	0.547568	MO17	indel+	1	8	9
b0439	Zm00001d041201	3	105179821	105183171	-	3:105183265-105183418	3:107501698-107501698	B73	94	3:105183066-105183265	3:105183418-105183619	153	153	1	TE-InDel	DNA	GRMZM2G062613	35.9346	-0.564518	0.718426	MO17	indel-	12	4	16	0.0710889	ns
b0440	Zm00001d041352	3	113916459	113919793	-	3:113920064-113920071	3:116590336-116591043	Mo17	278	3:113919877-113920071	3:113920064-113920246	707	419	0.592645	TE-InDel	DNA/hAT	GRMZM2G093347	66.0615	27.8165	0.850178	B73	indel-	0	4	4
b0441	Zm00001d041375	3	114714553	114715324	-	3:114716379-114716562	3:117411749-117411762	B73	1055	3:114716182-114716379	3:114716562-114716761	183	173	0.945355	TE-InDel	Simple_repeat	GRMZM2G405385	42.4295	1.76796	0.77674	B73	indel+	6	9	15	0.626081	ns
b0442	Zm00001d041443	3	120171712	120179837	-	3:120180774-120180783	3:122557011-122558025	Mo17	946	3:120180584-120180783	3:120180774-120180974	1014	1014	1	TE-InDel	DNA/hAT	GRMZM2G701688	27.5219	1.97452	0.595561	B73	indel-	1	8	9
b0443	Zm00001d041443	3	120171712	120179837	-	3:120182560-120182569	3:122559824-122560196	Mo17	2732	3:120182368-120182569	3:120182560-120182758	372	372	1	TE-InDel	DNA/hAT	GRMZM2G701688	27.5219	1.97452	0.595561	B73	indel-	9	3	12	0.19386	ns
b0444	Zm00001d041530	3	126035560	126036633	+	3:126035088-126035094	3:128362219-128363083	Mo17	472	3:126034950-126035094	3:126035088-126035288	864	824	0.953704	TE-InDel	DNA/hAT	GRMZM2G151717	31.5877	0.624185	0.64279	B73	indel-	1	10	11
b0445	Zm00001d041569	3	127515565	127518644	-	3:127518975-127519574	3:129955461-129955465	B73	331	3:127518776-127518975	3:127519574-127519777	599	599	1	TE-InDel	DNA	GRMZM2G067476	50.5846	9.42031	0.861624	B73	indel+	7	9	16	0.20003	ns
b0446	Zm00001d041608	3	129601695	129605205	-	3:129605823-129606302	3:132630664-132630669	B73	618	3:129605624-129605823	3:129606302-129606498	479	476	0.993737	TE-InDel	DNA/hAT	GRMZM2G045976	27.6664	0.269288	0.613362	B73	indel+	8	8	16	0.303107	ns
b0447	Zm00001d041691	3	133497582	133501433	-	3:133501758-133501765	3:136242476-136242874	Mo17	332	3:133501567-133501765	3:133501758-133501960	398	265	0.665829	TE-InDel	DNA/PIF-Harbinger	GRMZM2G155096	55.1507	8.03528	0.768602	B73	indel-	6	6	12	0.903996	ns
b0448	Zm00001d041700	3	133867939	133872499	-	3:133872565-133872570	3:136730997-136731134	Mo17	66	3:133872366-133872565	3:133872570-133872769	137	117	0.854015	TE-InDel	DNA/EnSpm/CACTA	GRMZM5G804881	74.3001	3.64433	0.94373	B73	indel-	3	9	12	0.119453	ns
b0449	Zm00001d041983	3	146581479	146589157	-	3:146589283-146589298	3:149626381-149631991	Mo17	141	3:146589096-146589298	3:146589283-146589483	5610	5486	0.977897	TE-InDel	DNA/EnSpm/CACTA	GRMZM2G397948	24.0697	1.11975	0.552746	B73	indel-	9	5	14	0.700035	ns
b0450	Zm00001d042059	3	149111492	149113865	-	3:149114116-149114117	3:152595504-152596671	Mo17	252	3:149113916-149114117	3:149114116-149114316	1167	1157	0.991431	TE-InDel	DNA/hAT	GRMZM2G168707	48.8606	5.47544	0.826174	B73	indel-	0	15	15
b0451	Zm00001d042233	3	157012964	157021930	-	3:157022192-157022194	3:159521307-159521445	Mo17	264	3:157021993-157022194	3:157022192-157022392	138	138	1	TE-InDel	LTR/Gypsy	GRMZM2G135095	69.0632	4.19657	0.914876	B73	indel-	6	10	16	0.35721	ns
b0452	Zm00001d042234	3	157121471	157126766	-	3:157126846-157126959	3:159680435-159680442	B73	80	3:157126640-157126846	3:157126959-157127158	113	113	1	TE-InDel	DNA/Helitron	GRMZM2G017404	23.9664	-1.07142	0.545558	MO17	indel-	6	10	16	0.193332	ns
b0453	Zm00001d042313	3	160480671	160486892	-	3:160487494-160487497	3:162951744-162952140	Mo17	605	3:160487298-160487497	3:160487494-160487694	396	396	1	TE-InDel	DNA/PIF-Harbinger	GRMZM2G171600	16.0874	1.06902	0.497861	B73	indel-	4	8	12	0.894548	ns
b0454	Zm00001d042357	3	163188684	163192336	+	3:163186730-163187061	3:165246234-165246236	B73	1623	3:163186542-163186730	3:163187061-163187262	331	330	0.996979	TE-InDel	DNA/PIF-Harbinger	GRMZM2G145390	40.0997	1.58	0.748852	B73	indel+	3	13	16	0.796611	ns
b0455	Zm00001d042357	3	163188684	163192336	+	3:163187974-163188513	3:165247125-165247128	B73	171	3:163187775-163187974	3:163188513-163188700	539	538	0.998145	TE-InDel	DNA/PIF-Harbinger	GRMZM2G145390	40.0997	1.58	0.748852	B73	indel+	3	13	16	0.796611	ns
b0456	Zm00001d042470	3	168688446	168712549	+	3:168686997-168688224	3:170772758-170772761	B73	222	3:168686798-168686997	3:168688224-168688422	1227	1037	0.845151	TE-InDel	DNA/Helitron	GRMZM2G113264	47.8984	0.692253	0.723067	B73	indel+	3	13	16	0.573217	ns
b0457	Zm00001d042490	3	169331424	169333982	-	3:169334365-169334703	3:171665772-171665775	B73	383	3:169334166-169334365	3:169334703-169334903	338	182	0.538462	TE-InDel	DNA/PIF-Harbinger	GRMZM2G176576	35.1533	7.02752	0.655627	B73	indel+	4	12	16	0.48876	ns
b0458	Zm00001d042512	3	170272101	170276048	+	3:170270553-170270623	3:172363060-172363855	Mo17	1478	3:170270354-170270553	3:170270623-170270821	795	444	0.558491	TE-InDel	DNA/PIF-Harbinger	GRMZM2G064914	25.3286	1.36893	0.575809	B73	indel-	5	7	12	0.515922	ns
b0460	Zm00001d042596	3	173074810	173078927	-	3:173079617-173079621	3:175086365-175087064	Mo17	694	3:173079422-173079621	3:173079617-173079817	699	698	0.998569	TE-InDel	LTR/Gypsy	GRMZM2G007160	35.779	1.7682	0.698526	B73	indel-	2	12	14	0.380551	ns
b0461	Zm00001d042638	3	174857764	174858788	+	3:174856511-174856519	3:177538454-177538592	Mo17	1253	3:174856323-174856519	3:174856511-174856714	138	138	1	TE-InDel	Simple_repeat	GRMZM2G129361	37.7589	0.689228	0.689255	B73	indel-	1	7	8
b0462	Zm00001d042638	3	174857764	174858788	+	3:174856849-174856956	3:177538932-177539607	Mo17	808	3:174856650-174856849	3:174856956-174857158	675	589	0.872593	TE-InDel	DNA/PIF-Harbinger	GRMZM2G129361	37.7589	0.689228	0.689255	B73	indel-	4	9	13	0.46034	ns
b0463	Zm00001d042642	3	175092425	175095996	-	3:175096146-175096695	3:177766097-177766107	B73	150	3:175095944-175096146	3:175096695-175096894	549	549	1	TE-InDel	DNA/hAT	GRMZM2G111441	38.0208	-1.75477	0.706312	MO17	indel-	7	9	16	0.635997	ns
b0464	Zm00001d042765	3	179131107	179131481	+	3:179129576-179129887	3:181224199-181224200	B73	1220	3:179129391-179129576	3:179129887-179130088	311	308	0.990354	TE-InDel	DNA/PIF-Harbinger	GRMZM2G127180	49.9427	4.0115	0.835978	B73	indel+	1	15	16
b0465	Zm00001d042765	3	179131107	179131481	+	3:179130531-179130532	3:181224851-181225217	Mo17	575	3:179130346-179130531	3:179130532-179130737	366	81	0.221311	TE-InDel	DNA/TcMar-Stowaway	GRMZM2G127180	49.9427	4.0115	0.835978	B73	indel-	12	2	14	0.636052	ns
b0466	Zm00001d042765	3	179131107	179131481	+	3:179130806-179130901	3:181225486-181225711	Mo17	206	3:179130607-179130806	3:179130901-179131100	225	181	0.804444	TE-InDel	DNA	GRMZM2G127180	49.9427	4.0115	0.835978	B73	indel-	6	2	8	0.973653	ns
b0467	Zm00001d042766	3	179135191	179136021	+	3:179133250-179133251	3:181228100-181228818	Mo17	1941	3:179133050-179133251	3:179133250-179133449	718	297	0.413649	TE-InDel	DNA	GRMZM2G426108	26.1968	0.66173	0.563425	B73	indel-	6	7	13	0.140517	ns
b0468	Zm00001d042794	3	179902053	179907809	-	3:179908369-179908371	3:181977459-181977618	Mo17	562	3:179908171-179908371	3:179908369-179908563	159	101	0.63522	TE-InDel	LTR/Copia	GRMZM2G096802	73.6259	1.58898	0.924112	B73	indel-	8	6	14	0.422665	ns
b0469	Zm00001d042812	3	180955995	180958405	-	3:180958825-180958964	3:183046821-183046824	B73	420	3:180958623-180958825	3:180958964-180959159	139	134	0.964029	TE-InDel	DNA/EnSpm/CACTA	GRMZM2G177518	30.646	0.23032	0.658775	B73	indel+	5	11	16	0.861947	ns
b0470	Zm00001d042826	3	181230771	181232225	-	3:181234983-181235569	3:183401743-183401746	B73	2758	3:181234781-181234983	3:181235569-181235764	586	583	0.994881	TE-InDel	DNA/PIF-Harbinger	GRMZM2G165192	20.5063	-1.64772	0.51188	MO17	indel-	4	12	16	0.337631	ns
b0471	Zm00001d042826	3	181230771	181232225	-	3:181236136-181236311	3:183402295-183402302	B73	3911	3:181235931-181236136	3:181236311-181236507	175	128	0.731429	TE-InDel	DNA/Helitron	GRMZM2G165192	20.5063	-1.64772	0.51188	MO17	indel-	2	14	16	0.799395	ns
b0472	Zm00001d042885	3	182852880	182858783	-	3:182860087-182860094	3:184948244-184948913	Mo17	1311	3:182859888-182860094	3:182860087-182860286	669	668	0.998505	TE-InDel	LTR/Gypsy	GRMZM2G014452	31.4033	2.47627	0.638743	B73	indel-	2	12	14	0.100331	ns
b0473	Zm00001d042900	3	183393752	183393982	-	3:183395792-183395944	3:185441652-185441664	B73	1810	3:183395638-183395792	3:183395944-183396144	152	0	0	none-TE-InDel		GRMZM2G064948	28.5812	2.39762	0.515303	B73	indel+	9	7	16	0.214814	ns
b0474	Zm00001d042900	3	183393752	183393982	-	3:183397088-183397095	3:185442769-185442889	Mo17	3106	3:183396889-183397088	3:183397095-183397212	120	120	1	TE-InDel	DNA/Helitron	GRMZM2G064948	28.5812	2.39762	0.515303	B73	indel-	7	5	12	0.83945	ns
b0475	Zm00001d042900	3	183393752	183393982	-	3:183397950-183398294	3:185443632-185443674	B73	3968	3:183397751-183397950	3:183398294-183398493	344	0	0	none-TE-InDel		GRMZM2G064948	28.5812	2.39762	0.515303	B73	indel+	5	11	16	0.248567	ns
b0476	Zm00001d042907	3	183642446	183644875	-	3:183645431-183645596	3:185740354-185740355	B73	556	3:183645232-183645431	3:183645596-183645788	165	165	1	TE-InDel	LTR/Gypsy	GRMZM2G157679	26.4359	1.17999	0.631797	B73	indel+	13	3	16	0.776363	ns
b0478	Zm00001d042961	3	184964596	184969233	-	3:184970769-184970776	3:187306419-187306729	Mo17	1543	3:184970569-184970776	3:184970769-184970965	310	310	1	TE-InDel	DNA/PIF-Harbinger	GRMZM2G426953	20.5721	-0.913362	0.520162	MO17	indel+	3	8	11	0.215293	ns
b0479	Zm00001d042961	3	184964596	184969233	-	3:184971402-184971409	3:187307407-187307965	Mo17	2176	3:184971209-184971409	3:184971402-184971600	558	381	0.682796	TE-InDel	DNA/hAT	GRMZM2G426953	20.5721	-0.913362	0.520162	MO17	indel+	3	11	14	0.004794	significant	indel+	consistent
b0480	Zm00001d042996	3	186190604	186192725	+	3:186188479-186188491	3:188452499-188452628	Mo17	2125	3:186188314-186188491	3:186188479-186188630	129	128	0.992248	TE-InDel	LTR/Gypsy	GRMZM2G105283	32.052	-1.54176	0.715297	MO17	indel+	4	10	14	0.206591	ns
b0481	Zm00001d043029	3	187041036	187047680	+	3:187040613-187040752	3:189124770-189124772	B73	284	3:187040415-187040613	3:187040752-187040952	139	44	0.316547	TE-InDel	DNA/PIF-Harbinger	GRMZM2G118363	24.5786	1.04137	0.551618	B73	indel+	2	14	16	0.64127	ns
b0482	Zm00001d043058	3	187676643	187680474	+	3:187674743-187674746	3:189788876-189789308	Mo17	1900	3:187674547-187674746	3:187674743-187674943	432	432	1	TE-InDel	DNA/PIF-Harbinger	GRMZM2G145753	42.8658	3.0441	0.769609	B73	indel-	2	9	11	0.172056	ns
b0484	Zm00001d043096	3	189146000	189147501	+	3:189144902-189144924	3:191316603-191316885	Mo17	1076	3:189144703-189144902	3:189144924-189145116	282	0	0	none-TE-InDel		GRMZM2G010447	34.3019	2.65084	0.659542	B73	indel-	10	5	15	0.816054	ns
b0485	Zm00001d043107	3	189323000	189325260	-	3:189325884-189326150	3:191489075-191489085	B73	624	3:189325685-189325884	3:189326150-189326260	266	236	0.887218	TE-InDel	LTR/Gypsy	GRMZM2G456114	26.1662	-0.254877	0.533186	MO17	indel-	8	8	16	0.307647	ns
b0486	Zm00001d043107	3	189323000	189325260	-	3:189326260-189326539	3:191489198-191489201	B73	1000	3:189326150-189326260	3:189326539-189326739	279	219	0.784946	TE-InDel	DNA	GRMZM2G456114	26.1662	-0.254877	0.533186	MO17	indel-	4	12	16	0.0447054	significant	indel+	inconsistent
b0487	Zm00001d043119	3	189711532	189712560	+	3:189710567-189711265	3:191996326-191996334	B73	267	3:189710364-189710567	3:189711265-189711464	698	454	0.65043	TE-InDel	LINE/L1	GRMZM2G460860	24.6883	2.73609	0.611447	B73	indel+	9	7	16	0.294164	ns
b0488	Zm00001d043158	3	190365000	190368453	-	3:190369133-190371850	3:192746215-192746228	B73	680	3:190368934-190369133	3:190371850-190372043	2717	1207	0.44424	TE-InDel	DNA	GRMZM2G071790	27.5477	-22.1135	0.595867	MO17	indel-	3	13	16	0.738784	ns
b0489	Zm00001d043178	3	190657582	190658649	+	3:190657225-190657233	3:193150048-193150220	Mo17	349	3:190657026-190657225	3:190657233-190657429	172	154	0.895349	TE-InDel	DNA/Helitron	GRMZM2G130558	26.874	-1.99869	0.602031	MO17	indel+	5	8	13	0.817139	ns
b0490	Zm00001d043202	3	191438583	191441993	-	3:191445120-191445250	3:193782320-193782323	B73	3127	3:191444921-191445120	3:191445250-191445450	130	104	0.8	TE-InDel	DNA/PIF-Harbinger	GRMZM2G302293	38.7225	0.189376	0.72911	B73	indel+	5	11	16	0.943174	ns
b0491	Zm00001d043296	3	194966876	194977775	+	3:194964212-194964547	3:197106341-197106347	B73	2329	3:194964013-194964212	3:194964547-194964747	335	199	0.59403	TE-InDel	LTR/Gypsy	GRMZM5G877838	17.1445	-3.59547	0.501669	MO17	indel-	3	13	16	0.639402	ns
b0492	Zm00001d043459	3	200575782	200580113	-	3:200583529-200584765	3:204552912-204552916	B73	3416	3:200583330-200583529	3:200584765-200584964	1236	1236	1	TE-InDel	LTR/Copia	GRMZM2G045366	20.1881	0.920199	0.522134	B73	indel+	5	11	16	0.106566	ns
b0493	Zm00001d043515	3	202396755	202399107	-	3:202399325-202399335	3:206582599-206582801	Mo17	218	3:202399126-202399325	3:202399335-202399532	202	198	0.980198	TE-InDel	DNA/EnSpm/CACTA	GRMZM2G057067	32.2726	-0.621981	0.698115	MO17	indel+	5	10	15	0.047624	significant	indel-	inconsistent
b0494	Zm00001d043515	3	202396755	202399107	-	3:202401224-202401253	3:206583757-206584114	Mo17	2117	3:202401027-202401224	3:202401253-202401455	357	312	0.87395	TE-InDel	DNA/EnSpm/CACTA	GRMZM2G057067	32.2726	-0.621981	0.698115	MO17	indel+	5	9	14	0.0443628	significant	indel-	inconsistent
b0495	Zm00001d043595	3	204592723	204595734	-	3:204596502-204596505	3:208766136-208766364	Mo17	771	3:204596307-204596505	3:204596502-204596608	228	220	0.964912	TE-InDel	DNA/PIF-Harbinger	GRMZM2G311003	53.6285	1.32264	0.813729	B73	indel-	10	5	15	0.707429	ns
b0498	Zm00001d043674	3	206991601	206992551	+	3:206990797-206990801	3:211345342-211345695	Mo17	804	3:206990602-206990801	3:206990797-206990989	353	353	1	TE-InDel	DNA/PIF-Harbinger	GRMZM2G380088	45.1566	2.1073	0.814065	B73	indel-	2	13	15	0.232668	ns
b0501	Zm00001d043707	3	207957925	207962301	+	3:207955804-207955811	3:212324138-212325563	Mo17	2121	3:207955623-207955811	3:207955804-207955936	1425	1076	0.755088	TE-InDel	DNA/hAT	GRMZM2G159924	45.7282	1.26945	0.771558	B73	indel-	3	11	14	0.46573	ns
b0502	Zm00001d043707	3	207957925	207962301	+	3:207955932-207955936	3:212325689-212326065	Mo17	1993	3:207955804-207955936	3:207955932-207956138	376	375	0.99734	TE-InDel	LTR/Copia	GRMZM2G159924	45.7282	1.26945	0.771558	B73	indel-	3	11	14	0.114559	ns
b0503	Zm00001d043773	3	209660488	209667099	-	3:209667621-209667696	3:214146674-214146864	Mo17	522	3:209667424-209667621	3:209667696-209667895	190	138	0.726316	TE-InDel	DNA/PIF-Harbinger	GRMZM2G055450	24.7407	0.885612	0.547756	B73	indel-	6	10	16	0.121341	ns
b0504	Zm00001d043851	3	212034975	212041814	+	3:212034424-212034471	3:217030266-217030606	Mo17	504	3:212034273-212034424	3:212034471-212034673	340	271	0.797059	TE-InDel	DNA/PIF-Harbinger	GRMZM2G152127	26.1954	-2.34946	0.593782	MO17	indel+	7	7	14	0.00488	significant	indel+	consistent
b0505	Zm00001d043860	3	212349764	212355788	-	3:212356651-212356663	3:217366859-217367542	Mo17	875	3:212356471-212356663	3:212356651-212356849	683	346	0.506589	TE-InDel	DNA/hAT	GRMZM2G127780	18.5291	-0.698714	0.534953	MO17	indel+	6	9	15	0.259017	ns
b0507	Zm00001d043904	3	213449817	213451294	-	3:213452063-213452067	3:218578326-218578530	Mo17	769	3:213451864-213452063	3:213452067-213452266	204	0	0	none-TE-InDel		GRMZM2G327189	49.4573	0.645533	0.860142	B73	indel-	6	4	10	0.0134499	significant	indel-	consistent
b0508	Zm00001d043904	3	213449817	213451294	-	3:213453831-213454386	3:218580425-218580425	B73	2537	3:213453653-213453831	3:213454386-213454514	555	399	0.718919	TE-InDel	LTR/Copia	GRMZM2G327189	49.4573	0.645533	0.860142	B73	indel+	5	11	16	0.0512736	ns
b0509	Zm00001d043973	3	215427508	215428164	+	3:215426120-215426757	3:220725706-220725713	B73	751	3:215425927-215426120	3:215426757-215426911	637	522	0.819466	TE-InDel	DNA/hAT	GRMZM2G046458	34.9193	2.12612	0.733437	B73	indel+	2	14	16	0.00569373	significant	indel+	consistent	yes	NaN	NaN
b0510	Zm00001d043973	3	215427508	215428164	+	3:215426905-215426911	3:220725859-220725992	Mo17	603	3:215426757-215426911	3:215426905-215427109	133	133	1	TE-InDel	LTR/Gypsy	GRMZM2G046458	34.9193	2.12612	0.733437	B73	indel-	1	11	12
b0511	Zm00001d044005	3	216247582	216249147	-	3:216249511-216252914	3:221491709-221491717	B73	364	3:216249312-216249511	3:216252914-216253106	3403	2738	0.804584	TE-InDel	DNA/hAT	GRMZM2G432918	43.9643	0.420061	0.671515	B73	indel+	4	11	15	0.299238	ns
b0512	Zm00001d044038	3	217462984	217467349	-	3:217469343-217469444	3:222632111-222632558	Mo17	1994	3:217469144-217469343	3:217469444-217469643	447	307	0.686801	TE-InDel	DNA/PIF-Harbinger	GRMZM2G047255	25.6922	-2.02677	0.617725	MO17	indel+	2	10	12	0.0828123	ns
b0513	Zm00001d044056	3	218044053	218050489	+	3:218043868-218043881	3:223272163-223273054	Mo17	172	3:218043670-218043868	3:218043881-218044077	891	891	1	TE-InDel	DNA/PIF-Harbinger	GRMZM2G022915	45.8813	-1.31988	0.73996	MO17	indel+	4	5	9	0.236066	ns
b0515	Zm00001d044110	3	219541267	219545352	-	3:219547240-219547289	3:224984555-224984975	Mo17	1937	3:219547087-219547289	3:219547240-219547349	420	420	1	TE-InDel	DNA/EnSpm/CACTA	GRMZM2G037431	48.2306	3.61812	0.740694	B73	indel-	8	5	13	0.451134	ns
b0516	Zm00001d044110	3	219541267	219545352	-	3:219548161-219548417	3:224985915-224986005	B73	2809	3:219547962-219548161	3:219548417-219548614	256	164	0.640625	TE-InDel	LTR/Gypsy	GRMZM2G037431	48.2306	3.61812	0.740694	B73	indel+	12	4	16	0.260964	ns
b0517	Zm00001d044116	3	219691690	219699173	-	3:219699561-219699717	3:225052837-225052845	B73	388	3:219699357-219699561	3:219699717-219699921	156	156	1	TE-InDel	DNA/Helitron	GRMZM2G180815	28.0778	2.75308	0.580912	B73	indel+	7	9	16	0.960803	ns
b0518	Zm00001d044120	3	219822561	219824045	-	3:219824201-219824427	3:225192455-225192457	B73	156	3:219824002-219824201	3:219824427-219824628	226	223	0.986726	TE-InDel	DNA/MuDR	GRMZM2G177384	42.9724	0.415636	0.79984	B73	indel+	12	4	16	0.434703	ns
b0519	Zm00001d044120	3	219822561	219824045	-	3:219824640-219824647	3:225192672-225192794	Mo17	602	3:219824445-219824647	3:219824640-219824840	122	122	1	TE-InDel	DNA/EnSpm/CACTA	GRMZM2G177384	42.9724	0.415636	0.79984	B73	indel-	2	13	15	0.396883	ns
b0520	Zm00001d044120	3	219822561	219824045	-	3:219826619-219826626	3:225194834-225195699	Mo17	2581	3:219826419-219826626	3:219826619-219826806	865	865	1	TE-InDel	DNA/hAT	GRMZM2G177384	42.9724	0.415636	0.79984	B73	indel-	1	12	13
b0521	Zm00001d044120	3	219822561	219824045	-	3:219827126-219827243	3:225196228-225196611	Mo17	3081	3:219826932-219827126	3:219827243-219827440	383	287	0.749347	TE-InDel	DNA/PIF-Harbinger	GRMZM2G177384	42.9724	0.415636	0.79984	B73	indel-	3	12	15	0.328957	ns
b0524	Zm00001d044179	3	221238399	221241312	-	3:221243896-221244496	3:226533344-226533357	B73	2584	3:221243697-221243896	3:221244496-221244680	600	587	0.978333	TE-InDel	DNA/hAT	GRMZM2G180699	22.7947	0.980535	0.513652	B73	indel+	4	12	16	0.554144	ns
b0525	Zm00001d044179	3	221238399	221241312	-	3:221245478-221245489	3:226534140-226535119	Mo17	4177	3:221245329-221245489	3:221245478-221245678	979	917	0.93667	TE-InDel	DNA/hAT	GRMZM2G180699	22.7947	0.980535	0.513652	B73	indel-	3	3	6	0.48148	ns
b0526	Zm00001d044195	3	221636992	221642811	+	3:221635465-221635813	3:227060272-227060352	B73	1179	3:221635280-221635465	3:221635813-221636015	348	327	0.939655	TE-InDel	DNA/PIF-Harbinger	GRMZM2G058039	26.5792	2.48266	0.607235	B73	indel+	15	1	16
b0527	Zm00001d044197	3	221729687	221732538	+	3:221728869-221728875	3:227113765-227114186	Mo17	818	3:221728675-221728875	3:221728869-221729065	421	70	0.166271	TE-InDel	DNA/hAT	GRMZM2G073460	35.7388	0.631241	0.701069	B73	indel-	0	16	16
b0528	Zm00001d044202	3	221800239	221803684	-	3:221803880-221803888	3:227145499-227146951	Mo17	204	3:221803680-221803888	3:221803880-221804080	1452	842	0.57989	TE-InDel	DNA/MuDR	GRMZM2G156126	26.6736	0.433591	0.689639	B73	indel-	1	13	14
b0529	Zm00001d044242	3	222847014	222848459	-	3:222850448-222850762	3:228109793-228109796	B73	1989	3:222850249-222850448	3:222850762-222850962	314	260	0.828025	TE-InDel	DNA/Mariner	GRMZM2G081816	33.8363	0.416323	0.647483	B73	indel+	8	8	16	0.15621	ns
b0530	Zm00001d044302	3	224594170	224597019	+	3:224591856-224592365	3:229825179-229825183	B73	1805	3:224591668-224591856	3:224592365-224592557	509	311	0.611002	TE-InDel	DNA/PIF-Harbinger	GRMZM2G430266	16.7527	0.376093	0.683666	B73	indel+	6	10	16	0.441276	ns
b0532	Zm00001d044416	3	227491480	227493229	+	3:227488527-227490547	3:232638541-232638550	B73	933	3:227488328-227488527	3:227490547-227490752	2020	1468	0.726733	TE-InDel	DNA/MuDR	GRMZM2G458095	19.4503	0.392108	0.504388	B73	indel+	4	12	16	0.283445	ns
b0533	Zm00001d044415	3	227490616	227495187	-	3:227495656-227495656	3:232644709-232644894	Mo17	469	3:227495484-227495656	3:227495656-227495857	185	182	0.983784	TE-InDel	DNA/PIF-Harbinger	GRMZM2G157574	33.676	1.16957	0.595865	B73	indel-	2	13	15	0.84869	ns
b0534	Zm00001d044415	3	227490616	227495187	-	3:227497471-227497999	3:232646703-232646709	B73	2284	3:227497266-227497471	3:227497999-227498198	528	335	0.63447	TE-InDel	DNA/hAT	GRMZM2G157574	33.676	1.16957	0.595865	B73	indel+	7	9	16	0.301874	ns
b0535	Zm00001d044415	3	227490616	227495187	-	3:227498475-227498715	3:232647178-232647178	B73	3288	3:227498276-227498475	3:227498715-227498916	240	0	0	none-TE-InDel		GRMZM2G157574	33.676	1.16957	0.595865	B73	indel+	6	10	16	0.788664	ns
b0536	Zm00001d044443	3	228235045	228243424	-	3:228244156-228244419	3:233235861-233235868	B73	732	3:228243957-228244156	3:228244419-228244618	263	35	0.13308	TE-InDel	Simple_repeat	GRMZM2G143139	22.8941	0.184585	0.529378	B73	indel+	6	10	16	0.00448143	significant	indel-	inconsistent
b0537	Zm00001d044469	3	229010501	229015061	-	3:229015284-229015286	3:234012584-234012785	Mo17	225	3:229015084-229015286	3:229015284-229015484	201	0	0	none-TE-InDel		GRMZM2G049866	46.3455	-6.74098	0.79465	MO17	indel+	1	14	15
b0538	Zm00001d044495	3	229664664	229670336	-	3:229670669-229670669	3:234773033-234775621	Mo17	333	3:229670473-229670669	3:229670669-229670839	2588	1409	0.544436	TE-InDel	DNA/Helitron	GRMZM2G093032	29.0564	1.25368	0.617398	B73	indel-	2	7	9	0.00193281	significant	indel+	inconsistent
b0539	Zm00001d044495	3	229664664	229670336	-	3:229670833-229670839	3:234775789-234776106	Mo17	503	3:229670669-229670839	3:229670833-229671026	317	315	0.993691	TE-InDel	DNA/PIF-Harbinger	GRMZM2G093032	29.0564	1.25368	0.617398	B73	indel-	2	8	10	0.00311083	significant	indel+	inconsistent
b0540	Zm00001d044495	3	229664664	229670336	-	3:229673152-229673684	3:234779516-234779531	B73	2816	3:229672953-229673152	3:229673684-229673844	532	159	0.298872	TE-InDel	DNA/PIF-Harbinger	GRMZM2G093032	29.0564	1.25368	0.617398	B73	indel+	8	7	15	0.00349946	significant	indel-	inconsistent
b0541	Zm00001d044495	3	229664664	229670336	-	3:229674454-229674455	3:234780263-234780438	Mo17	4118	3:229674263-229674454	3:229674455-229674655	175	0	0	none-TE-InDel		GRMZM2G093032	29.0564	1.25368	0.617398	B73	indel-	5	11	16	0.221619	ns
b0542	Zm00001d044501	3	229953882	229954448	-	3:229955485-229955660	3:234961421-234961429	B73	1037	3:229955286-229955485	3:229955660-229955859	175	175	1	TE-InDel	LTR/Gypsy	GRMZM2G174335	25.7228	0.864094	0.535516	B73	indel+	9	7	16	0.509723	ns
b0543	Zm00001d044608	3	233328410	233331483	-	3:233331664-233332048	3:238349301-238349320	B73	181	3:233331465-233331664	3:233332048-233332247	384	384	1	TE-InDel	DNA/MuDR	GRMZM2G093175	16.8666	0.599596	0.513426	B73	indel+	9	6	15	0.541441	ns
b0544	Zm00001d044635	3	233750694	233751206	-	3:233751441-233752141	3:238721661-238721667	B73	235	3:233751244-233751441	3:233752141-233752338	700	464	0.662857	TE-InDel	DNA/PIF-Harbinger	GRMZM2G091235	46.2547	3.04588	0.79773	B73	indel+	7	9	16	0.663107	ns
b0546	Zm00001d044667	3	234427651	234431985	+	3:234425627-234425631	3:239191022-239191147	Mo17	2024	3:234425432-234425631	3:234425627-234425772	125	120	0.96	TE-InDel	DNA	GRMZM2G044004	43.0178	8.91211	0.842379	B73	indel-	1	13	14
b0547	Zm00001d044669	3	234440135	234442192	-	3:234442764-234442766	3:239206421-239206559	Mo17	574	3:234442567-234442766	3:234442764-234442964	138	138	1	TE-InDel	LTR/Gypsy	GRMZM2G043843	44.2966	-1.45385	0.728589	MO17	indel+	3	7	10	0.98911	ns
b0548	Zm00001d048600	4	1042494	1044431	-	4:1045199-1045371	4:977028-977029	B73	768	4:1045069-1045199	4:1045371-1045571	172	0	0	none-TE-InDel		GRMZM5G895672	25.1953	-0.0940867	0.566873	MO17	indel-	6	10	16	0.568525	ns
b0549	Zm00001d048669	4	3057594	3060877	+	4:3055692-3055993	4:1985212-1985251	B73	1601	4:3055570-3055692	4:3055993-3056134	301	209	0.694352	TE-InDel	DNA/hAT	GRMZM2G146192	28.6562	4.71237	0.518539	B73	indel+	10	6	16	0.347171	ns
b0550	Zm00001d048671	4	3088195	3089163	-	4:3090951-3090955	4:1999499-1999671	Mo17	1792	4:3090755-3090955	4:3090951-3091151	172	0	0	none-TE-InDel		GRMZM2G001169	37.8643	-3.02196	0.70779	MO17	indel+	5	7	12	0.468207	ns
b0551	Zm00001d048960	4	10883172	10884815	+	4:10882563-10882795	4:10274287-10274289	B73	377	4:10882421-10882563	4:10882795-10882986	232	145	0.625	TE-InDel	DNA/PIF-Harbinger	GRMZM2G358791	21.4668	-0.616	0.529367	MO17	indel-	3	13	16	0.337873	ns
b0552	Zm00001d049000	4	12135060	12136322	-	4:12138148-12138275	4:11598478-11598910	Mo17	1826	4:12137949-12138148	4:12138275-12138473	432	386	0.893519	TE-InDel	DNA/PIF-Harbinger	GRMZM2G068330	32.7762	0.85079	0.582584	B73	indel-	3	10	13	0.794174	ns
b0553	Zm00001d049107	4	16170775	16174409	-	4:16174777-16174825	4:15796054-15797672	Mo17	368	4:16174588-16174777	4:16174825-16174948	1618	1618	1	TE-InDel	DNA/Helitron	GRMZM2G356545	50.9783	0.911413	0.771385	B73	indel-	3	11	14	0.18228	ns
b0554	Zm00001d049171	4	19002050	19005122	-	4:19005150-19005158	4:18858936-18861014	Mo17	36	4:19004952-19005158	4:19005150-19005350	2078	2078	1	TE-InDel	DNA/MuDR	GRMZM2G173085	60.8121	0.655716	0.800991	B73	indel-	1	8	9
b0555	Zm00001d049192	4	19868766	19876540	-	4:19876845-19877174	4:19675651-19675656	B73	305	4:19876646-19876845	4:19877174-19877375	329	320	0.972644	TE-InDel	DNA/PIF-Harbinger	GRMZM5G892742	58.8909	2.73305	0.892756	B73	indel+	9	7	16	0.315808	ns
b0556	Zm00001d049507	4	32694740	32698204	-	4:32698578-32698582	4:32036447-32036657	Mo17	378	4:32698385-32698582	4:32698578-32698777	210	140	0.666667	TE-InDel	LTR/Cassandra	GRMZM2G059556	72.9575	19.5808	0.931999	B73	indel-	13	2	15	0.810374	ns
b0557	Zm00001d049525	4	33186410	33189186	+	4:33184470-33184830	4:33035799-33035802	B73	1580	4:33184271-33184470	4:33184830-33185025	360	353	0.980556	TE-InDel	DNA/Helitron	GRMZM2G055135	39.9741	8.04215	0.748344	B73	indel+	11	5	16	0.370734	ns
b0558	Zm00001d049525	4	33186410	33189186	+	4:33185426-33185507	4:33036408-33037096	Mo17	903	4:33185227-33185426	4:33185507-33185712	688	588	0.854651	TE-InDel	DNA/PIF-Harbinger	GRMZM2G055135	39.9741	8.04215	0.748344	B73	indel-	4	11	15	0.276191	ns
b0559	Zm00001d049539	4	33796845	33798491	+	4:33796580-33796681	4:33527253-33531502	Mo17	164	4:33796383-33796580	4:33796681-33796880	4249	3371	0.793363	TE-InDel	DNA/hAT	AC203909.3_FG003	55.6046	-0.662195	0.82174	MO17	indel+	5	6	11	0.477134	ns
b0560	Zm00001d049544	4	34206911	34208549	+	4:34206148-34206148	4:33762960-33766360	Mo17	763	4:34205951-34206148	4:34206148-34206313	3400	563	0.165588	TE-InDel	DNA/Helitron	GRMZM2G128504	33.9511	0.631788	0.663185	B73	indel-	9	6	15	0.00234159	significant	indel-	consistent
b0561	Zm00001d049545	4	34264078	34264647	+	4:34262609-34262914	4:33817895-33817898	B73	1164	4:34262448-34262609	4:34262914-34263108	305	305	1	TE-InDel	DNA/PIF-Harbinger	GRMZM2G129585	33.0385	9.36702	0.602872	B73	indel+	3	13	16	0.924015	ns
b0562	Zm00001d049545	4	34264078	34264647	+	4:34263479-34263489	4:33818482-33819767	Mo17	589	4:34263285-34263479	4:34263489-34263688	1285	746	0.580545	TE-InDel	DNA/EnSpm/CACTA	GRMZM2G129585	33.0385	9.36702	0.602872	B73	indel-	1	14	15
b0566	Zm00001d049619	4	37784246	37786605	+	4:37784053-37784096	4:36975133-36978101	Mo17	150	4:37783856-37784053	4:37784096-37784295	2968	2847	0.959232	TE-InDel	LTR/Copia	GRMZM2G179976	46.4412	49.3609	0.858831	B73	indel-	2	11	13	0.180649	ns
b0567	Zm00001d049632	4	38171001	38172440	-	4:38172842-38172847	4:37519150-37519405	Mo17	402	4:38172643-38172842	4:38172847-38173043	255	155	0.607843	TE-InDel	DNA/MuDR	GRMZM2G007587	56.3922	-2.64451	0.821116	MO17	indel+	3	4	7	0.237053	ns
b0568	Zm00001d049632	4	38171001	38172440	-	4:38174158-38174457	4:37520717-37520719	B73	1718	4:38173959-38174158	4:38174457-38174633	299	298	0.996656	TE-InDel	DNA/PIF-Harbinger	GRMZM2G007587	56.3922	-2.64451	0.821116	MO17	indel-	4	12	16	0.274943	ns
b0570	Zm00001d049659	4	38969055	38969360	-	4:38970379-38973661	4:38450382-38450386	B73	1019	4:38970180-38970379	4:38973661-38973811	3282	2183	0.665143	TE-InDel	LINE/L1	GRMZM2G420812	41.1184	1.60526	0.790872	B73	indel+	4	12	16	0.369175	ns
b0571	Zm00001d049714	4	41260801	41267359	-	4:41268023-41268160	4:40647391-40647394	B73	664	4:41267824-41268023	4:41268160-41268357	137	137	1	TE-InDel	LTR/Gypsy	GRMZM2G059432	58.5349	1.77096	0.861053	B73	indel+	5	11	16	0.00844712	significant	indel+	consistent
b0573	Zm00001d049914	4	52306680	52310011	+	4:52304885-52306471	4:51337452-51337452	B73	209	4:52304687-52304885	4:52306471-52306669	1586	1586	1	TE-InDel	DNA/Helitron	GRMZM2G177052	49.4308	-1.36922	0.852115	MO17	indel-	12	4	16	0.00153892	significant	indel-	consistent
b0574	Zm00001d050106	4	65967344	65976964	-	4:65978586-65978593	4:65540354-65541174	Mo17	1629	4:65978386-65978593	4:65978586-65978784	820	771	0.940244	TE-InDel	DNA/hAT	GRMZM2G075775	24.7276	-4.66802	0.530017	MO17	indel+	3	11	14	0.311745	ns
b0575	Zm00001d050107	4	66086547	66090296	+	4:66083648-66083653	4:65749374-65750437	Mo17	2899	4:66083455-66083653	4:66083648-66083843	1063	920	0.865475	TE-InDel	DNA/hAT	GRMZM2G082087	39.4971	-2.70538	0.687152	MO17	indel+	4	11	15	0.00557973	significant	indel-	inconsistent
b0576	Zm00001d050107	4	66086547	66090296	+	4:66084087-66084283	4:65750866-65750879	B73	2264	4:66083889-66084087	4:66084283-66084482	196	188	0.959184	TE-InDel	DNA/PIF-Harbinger	GRMZM2G082087	39.4971	-2.70538	0.687152	MO17	indel-	11	5	16	0.132571	ns
b0577	Zm00001d050107	4	66086547	66090296	+	4:66084564-66084567	4:65751163-65751535	Mo17	1983	4:66084368-66084567	4:66084564-66084712	372	360	0.967742	TE-InDel	DNA/PIF-Harbinger	GRMZM2G082087	39.4971	-2.70538	0.687152	MO17	indel+	4	9	13	0.00577702	significant	indel-	inconsistent
b0578	Zm00001d050202	4	73397381	73401948	-	4:73402018-73402451	4:73096982-73096984	B73	70	4:73401819-73402018	4:73402451-73402649	433	433	1	TE-InDel	DNA/PIF-Harbinger	GRMZM2G104704	21.0313	-1.3792	0.53466	MO17	indel-	8	8	16	0.561147	ns
b0579	Zm00001d050978	4	134816363	134819668	-	4:134821390-134821508	4:136845535-136845537	B73	1722	4:134821189-134821390	4:134821508-134821707	118	118	1	TE-InDel	DNA/Helitron	GRMZM2G122983	37.5901	1.73436	0.721717	B73	indel+	11	5	16	0.00166005	significant	indel+	consistent
b0580	Zm00001d051043	4	138316944	138322251	-	4:138322501-138322508	4:140105261-140105902	Mo17	257	4:138322305-138322508	4:138322501-138322705	641	640	0.99844	TE-InDel	DNA/hAT	GRMZM2G407044	26.1714	3.53934	0.60535	B73	indel-	4	11	15	0.182161	ns
b0581	Zm00001d051069	4	140513011	140519548	+	4:140512299-140512847	4:142104189-142104198	B73	164	4:140512102-140512299	4:140512847-140513047	548	548	1	TE-InDel	DNA/hAT	GRMZM2G138566	37.6053	0.649225	0.63753	B73	indel+	12	4	16	0.0855324	ns
b0582	Zm00001d051156	4	146401256	146402641	+	4:146400387-146400445	4:148576116-148576766	Mo17	811	4:146400192-146400387	4:146400445-146400644	650	564	0.867692	TE-InDel	DNA/PIF-Harbinger	GRMZM2G135091	42.7629	-7.078	0.782597	MO17	indel+	11	4	15	0.942208	ns
b0583	Zm00001d051157	4	146405890	146410901	-	4:146411482-146411485	4:148610215-148614013	Mo17	584	4:146411283-146411485	4:146411482-146411682	3798	2340	0.616114	TE-InDel	LTR/Gypsy	GRMZM2G135132	26.909	9.23176	0.616273	B73	indel-	4	8	12	0.194739	ns
b0584	Zm00001d051227	4	149227927	149231063	-	4:149231196-149231733	4:151408285-151408291	B73	133	4:149231001-149231196	4:149231733-149231933	537	345	0.642458	TE-InDel	DNA/hAT	GRMZM2G149272	35.6302	1.78267	0.764618	B73	indel+	8	8	16	0.571387	ns
b0588	Zm00001d051427	4	158189751	158191758	+	4:158189210-158189523	4:160633925-160633929	B73	228	4:158189015-158189210	4:158189523-158189722	313	311	0.99361	TE-InDel	DNA/PIF-Harbinger	GRMZM2G156785	43.135	23.1058	0.701162	B73	indel+	7	9	16	0.384142	ns
b0589	Zm00001d051503	4	160575144	160576966	+	4:160570499-160570501	4:162901221-162901401	Mo17	4645	4:160570303-160570501	4:160570499-160570700	180	179	0.994444	TE-InDel	DNA/PIF-Harbinger	GRMZM2G133146	48.2	1.58449	0.83193	B73	indel-	1	7	8
b0590	Zm00001d051503	4	160575144	160576966	+	4:160571875-160572343	4:162902791-162902814	B73	2801	4:160571676-160571875	4:160572343-160572534	468	450	0.961538	TE-InDel	DNA/hAT	GRMZM2G133146	48.2	1.58449	0.83193	B73	indel+	9	7	16	0.24054	ns
b0591	Zm00001d051511	4	160984327	160986154	-	4:160986453-160986454	4:163448152-163448846	Mo17	299	4:160986254-160986453	4:160986454-160986654	694	693	0.998559	TE-InDel	LINE/L1	GRMZM2G091044	35.6799	1.35912	0.693543	B73	indel-	2	12	14	0.485993	ns
b0594	Zm00001d051589	4	163588760	163592644	-	4:163592767-163592767	4:166934123-166934305	Mo17	123	4:163592568-163592767	4:163592767-163592968	182	181	0.994505	TE-InDel	DNA/PIF-Harbinger	GRMZM2G060947	21.5811	-2.38838	0.579027	MO17	indel+	3	9	12	0.0276642	significant	indel+	consistent
b0595	Zm00001d051589	4	163588760	163592644	-	4:163594393-163594405	4:166935936-166938294	Mo17	1749	4:163594206-163594393	4:163594405-163594604	2358	2309	0.97922	TE-InDel	DNA/MuDR	GRMZM2G060947	21.5811	-2.38838	0.579027	MO17	indel+	1	14	15
b0597	Zm00001d051804	4	170036696	170039992	-	4:170041410-170041415	4:173513564-173513912	Mo17	1423	4:170041232-170041415	4:170041410-170041610	348	345	0.991379	TE-InDel	LTR/Gypsy	GRMZM2G036464	55.7504	17.2821	0.822442	B73	indel-	4	4	8	0.00224068	significant	indel-	consistent	yes	19.7893	2.03519e-05
b0598	Zm00001d051809	4	170142800	170148637	-	4:170148681-170149285	4:173599793-173599824	B73	44	4:170148482-170148681	4:170149285-170149456	604	392	0.649007	TE-InDel	DNA/hAT	GRMZM2G168337	28.3716	1.60267	0.556825	B73	indel+	4	12	16	0.00967593	significant	indel+	consistent
b0599	Zm00001d051846	4	172092411	172099344	+	4:172092140-172092144	4:175652163-175652569	Mo17	271	4:172091945-172092144	4:172092140-172092257	406	328	0.807882	TE-InDel	DNA/PIF-Harbinger	GRMZM2G152278	39.8583	0.965856	0.641056	B73	indel-	8	6	14	0.107048	ns
b0601	Zm00001d051944	4	174979279	174979605	-	4:174983709-174983834	4:178473532-178473533	B73	4104	4:174983512-174983709	4:174983834-174984035	125	0	0	none-TE-InDel		GRMZM2G466532	32.4507	2.09903	0.666177	B73	indel+	13	3	16	0.311901	ns
b0603	Zm00001d052200	4	183162057	183165340	-	4:183166909-183167034	4:186333627-186333631	B73	1569	4:183166710-183166909	4:183167034-183167138	125	120	0.96	TE-InDel	DNA	GRMZM2G109140	55.0881	3.97238	0.861566	B73	indel+	3	13	16	0.335499	ns
b0604	Zm00001d052212	4	183376753	183379650	-	4:183380027-183380040	4:186648320-186648633	Mo17	377	4:183379832-183380027	4:183380040-183380239	313	101	0.322684	TE-InDel	DNA	GRMZM2G169617	26.6146	-0.753269	0.554907	MO17	indel+	7	6	13	0.111141	ns
b0605	Zm00001d052237	4	184283129	184292636	-	4:184292758-184292760	4:187371390-187371592	Mo17	124	4:184292562-184292760	4:184292758-184292958	202	201	0.99505	TE-InDel	DNA/PIF-Harbinger	GRMZM2G098583	30.1613	-2.91684	0.546963	MO17	indel+	9	6	15	0.00468124	significant	indel+	consistent
b0606	Zm00001d052377	4	188547876	188549444	-	4:188549541-188549558	4:191670498-191670727	Mo17	97	4:188549342-188549541	4:188549558-188549750	229	147	0.641921	TE-InDel	DNA	GRMZM2G020864	39.9461	-0.492221	0.78538	MO17	indel+	3	13	16	0.0255835	significant	indel+	consistent
b0608	Zm00001d052391	4	188982584	188986172	-	4:188988210-188988219	4:192035095-192035488	Mo17	2047	4:188988022-188988219	4:188988210-188988410	393	207	0.526718	TE-InDel	DNA/hAT	GRMZM2G179737	37.5161	8.42395	0.713594	B73	indel-	1	7	8
b0610	Zm00001d052404	4	189185653	189190003	+	4:189184325-189184339	4:192153914-192155386	Mo17	1328	4:189184138-189184339	4:189184325-189184525	1472	866	0.588315	TE-InDel	DNA/hAT	GRMZM2G174797	25.6907	1.28688	0.57352	B73	indel-	1	13	14
b0611	Zm00001d052442	4	190119181	190122383	-	4:190122664-190122670	4:193053594-193053822	Mo17	287	4:190122468-190122670	4:190122664-190122867	228	222	0.973684	TE-InDel	DNA/PIF-Harbinger	GRMZM2G171702	21.0869	6.71864	0.496926	B73	indel-	7	6	13	0.495292	ns
b0612	Zm00001d052457	4	190405622	190411632	+	4:190403604-190404005	4:193504883-193504885	B73	1617	4:190403406-190403604	4:190404005-190404207	401	397	0.990025	TE-InDel	DNA/hAT	GRMZM2G357620	44.2698	2.59671	0.738714	B73	indel+	3	13	16	0.369428	ns
b0613	Zm00001d052520	4	191984692	191985651	+	4:191983434-191984392	4:194923850-194923856	B73	300	4:191983243-191983434	4:191984392-191984587	958	958	1	TE-InDel	DNA/hAT	GRMZM2G051787	56.9907	1.00991	0.900685	B73	indel+	7	9	16	0.721593	ns
b0614	Zm00001d052537	4	192553796	192554988	-	4:192557800-192557806	4:195323155-195323392	Mo17	2818	4:192557607-192557806	4:192557800-192558000	237	0	0	none-TE-InDel		GRMZM2G132880	22.4466	0.938383	0.545482	B73	indel-	2	13	15
b0615	Zm00001d052537	4	192553796	192554988	-	4:192558001-192558012	4:195323604-195323789	Mo17	3024	4:192557813-192558012	4:192558001-192558201	185	185	1	TE-InDel	LTR/Gypsy	GRMZM2G132880	22.4466	0.938383	0.545482	B73	indel-	2	10	12
b0616	Zm00001d052695	4	197650460	197663462	-	4:197663887-197663895	4:199973113-199975644	Mo17	433	4:197663696-197663895	4:197663887-197664094	2531	1976	0.780719	TE-InDel	DNA/MuDR	GRMZM2G320723	47.4818	1.14659	0.822028	B73	indel-	4	10	14	0.984414	ns
b0617	Zm00001d052695	4	197650460	197663462	-	4:197664704-197664783	4:199976459-199976735	Mo17	1242	4:197664507-197664704	4:197664783-197664973	276	211	0.764493	TE-InDel	DNA/MuDR	GRMZM2G320723	47.4818	1.14659	0.822028	B73	indel-	12	3	15	0.0620025	ns
b0618	Zm00001d052701	4	198079781	198083069	-	4:198084655-198084982	4:200294969-200294970	B73	1586	4:198084461-198084655	4:198084982-198085150	327	311	0.95107	TE-InDel	DNA/PIF-Harbinger	GRMZM2G173684	63.0895	-3.0169	0.880067	MO17	indel-	4	12	16	0.707476	ns
b0619	Zm00001d052797	4	201290250	201299726	-	4:201301078-201302700	4:203596507-203596517	B73	1352	4:201300877-201301078	4:201302700-201302887	1622	1622	1	TE-InDel	LTR/Gypsy	GRMZM5G828182	28.8776	-1.75469	0.580579	MO17	indel-	3	13	16	0.430344	ns
b0620	Zm00001d052837	4	202248589	202251858	+	4:202247241-202247672	4:204477301-204477371	B73	917	4:202247091-202247241	4:202247672-202247805	431	168	0.389791	TE-InDel	Simple_repeat	GRMZM2G130505	34.2066	0.968828	0.698805	B73	indel+	5	11	16	0.0491465	significant	indel+	consistent
b0621	Zm00001d053004	4	208649304	208651866	-	4:208653523-208653537	4:211162518-211164359	Mo17	1671	4:208653338-208653537	4:208653523-208653736	1841	1838	0.99837	TE-InDel	LINE/L1	GRMZM2G045057	19.6848	0.291829	0.524492	B73	indel-	4	11	15	0.0881126	ns
b0622	Zm00001d053215	4	220475424	220477483	+	4:220474815-220474819	4:224051876-224052189	Mo17	609	4:220474622-220474819	4:220474815-220475013	313	311	0.99361	TE-InDel	DNA/PIF-Harbinger	GRMZM2G138896	42.1293	1.68932	0.805671	B73	indel-	1	13	14
b0623	Zm00001d053275	4	223795615	223808189	-	4:223808484-223811589	4:227200416-227200426	B73	295	4:223808288-223808484	4:223811589-223811784	3105	634	0.204187	TE-InDel	DNA/PIF-Harbinger	GRMZM2G461808	52.3649	-1.85512	0.860512	MO17	indel-	4	12	16	0.999745	ns
b0624	Zm00001d053282	4	223911515	223915010	+	4:223911019-223911021	4:227346640-227346873	Mo17	496	4:223910821-223911021	4:223911019-223911217	233	224	0.961373	TE-InDel	DNA/PIF-Harbinger	GRMZM2G096946	21.7854	-1.72908	0.561529	MO17	indel+	3	5	8	0.0564393	ns
b0625	Zm00001d053396	4	229215684	229219292	-	4:229221907-229223331	4:232959115-232959119	B73	2615	4:229221708-229221907	4:229223331-229223534	1424	1424	1	TE-InDel	DNA/EnSpm/CACTA	GRMZM2G048733	24.0862	2.09194	0.591702	B73	indel+	9	7	16	0.247237	ns
b0626	Zm00001d053453	4	232245967	232253821	-	4:232253961-232254098	4:234926491-234926494	B73	140	4:232253762-232253961	4:232254098-232254309	137	137	1	TE-InDel	LTR/Gypsy	GRMZM2G074122	43.5238	16.1393	0.623238	B73	indel+	6	10	16	0.870915	ns
b0627	Zm00001d053453	4	232245967	232253821	-	4:232255287-232258594	4:234927677-234927679	B73	1466	4:232255088-232255287	4:232258594-232258794	3307	3307	1	TE-InDel	LTR/Gypsy	GRMZM2G074122	43.5238	16.1393	0.623238	B73	indel+	8	8	16	0.411513	ns
b0628	Zm00001d053617	4	236577171	236580231	+	4:236573042-236573042	4:239152794-239153027	Mo17	4129	4:236572843-236573042	4:236573042-236573241	233	218	0.935622	TE-InDel	DNA/MuDR	GRMZM2G107322	20.7258	0.175549	0.539614	B73	indel-	9	4	13	0.253858	ns
b0629	Zm00001d053617	4	236577171	236580231	+	4:236573325-236573333	4:239153313-239153494	Mo17	3838	4:236573137-236573325	4:236573333-236573535	181	126	0.696133	TE-InDel	Low_complexity	GRMZM2G107322	20.7258	0.175549	0.539614	B73	indel-	10	4	14	0.337393	ns
b0630	Zm00001d053640	4	238064255	238068266	-	4:238068361-238068380	4:240487768-240488525	Mo17	95	4:238068162-238068361	4:238068380-238068579	757	730	0.964333	TE-InDel	DNA/Helitron	GRMZM2G180971	39.473	1.31765	0.750742	B73	indel-	2	12	14	0.264943	ns
b0631	Zm00001d053660	4	238366195	238369060	+	4:238361732-238362070	4:240813000-240813015	B73	4125	4:238361535-238361732	4:238362070-238362256	338	338	1	TE-InDel	LINE/L1	GRMZM2G030542	28.0277	1.19399	0.643469	B73	indel+	7	9	16	0.158421	ns
b0632	Zm00001d053660	4	238366195	238369060	+	4:238362408-238362418	4:240813362-240813482	Mo17	3787	4:238362219-238362418	4:238362408-238362617	120	91	0.758333	TE-InDel	DNA	GRMZM2G030542	28.0277	1.19399	0.643469	B73	indel-	4	9	13	0.00552863	significant	indel+	inconsistent
b0634	Zm00001d053727	4	239922850	239929510	+	4:239918714-239918724	4:242522899-242523051	Mo17	4126	4:239918569-239918714	4:239918724-239918864	152	0	0	none-TE-InDel		GRMZM2G104419	47.3168	3.69873	0.819219	B73	indel-	4	5	9	0.829816	ns
b0635	Zm00001d053727	4	239922850	239929510	+	4:239921895-239921932	4:242525472-242525644	Mo17	918	4:239921716-239921895	4:239921932-239922134	172	0	0	none-TE-InDel		GRMZM2G104419	47.3168	3.69873	0.819219	B73	indel-	3	5	8	0.428001	ns
b0636	Zm00001d053749	4	240414100	240417560	+	4:240412151-240412523	4:243056765-243056911	B73	1577	4:240411952-240412151	4:240412523-240412680	372	258	0.693548	TE-InDel	DNA/Helitron	GRMZM2G433591	34.062	1.69467	0.623493	B73	indel+	1	15	16
b0637	Zm00001d053749	4	240414100	240417560	+	4:240412680-240413721	4:243057068-243057072	B73	379	4:240412523-240412680	4:240413721-240413912	1041	962	0.924111	TE-InDel	LTR/Gypsy	GRMZM2G433591	34.062	1.69467	0.623493	B73	indel+	2	14	16	0.716524	ns
b0639	Zm00001d053919	4	243647953	243651842	-	4:243652639-243654572	4:246413233-246413253	B73	797	4:243652440-243652639	4:243654572-243654707	1933	1895	0.980341	TE-InDel	DNA/MuDR	GRMZM2G060669	31.3601	5.41694	0.645505	B73	indel+	3	13	16	0.0419681	significant	indel+	consistent
b0642	Zm00001d053964	4	244385754	244388332	+	4:244384649-244385629	4:247016862-247016863	B73	125	4:244384454-244384649	4:244385629-244385830	980	528	0.538776	TE-InDel	DNA/PIF-Harbinger	GRMZM2G019284	21.1816	1.6699	0.564177	B73	indel+	10	6	16	0.735005	ns
b0643	Zm00001d053974	4	244500837	244504634	-	4:244506794-244506944	4:247117555-247117563	B73	2160	4:244506595-244506794	4:244506944-244507144	150	123	0.82	TE-InDel	DNA/Helitron	GRMZM2G069569	33.2227	-0.432677	0.65321	MO17	indel-	5	11	16	0.923449	ns
b0644	Zm00001d054009	4	245084211	245085341	+	4:245083943-245083950	4:247770303-247770836	Mo17	268	4:245083766-245083950	4:245083943-245084143	533	532	0.998124	TE-InDel	DNA/hAT	GRMZM2G006234	49.459	2.10699	0.806772	B73	indel-	4	11	15	0.488248	ns
b0645	Zm00001d054034	4	245348907	245352015	-	4:245352591-245352593	4:247997705-247998113	Mo17	578	4:245352393-245352593	4:245352591-245352788	408	153	0.375	TE-InDel	DNA/PIF-Harbinger	GRMZM2G119426	30.4461	3.94557	0.664455	B73	indel-	4	9	13	0.290304	ns
b0646	Zm00001d054039	4	245458106	245461203	-	4:245465125-245465129	4:248100591-248101009	Mo17	3926	4:245464930-245465129	4:245465125-245465324	418	0	0	none-TE-InDel		GRMZM2G018251	33.216	1.49892	0.645114	B73	indel-	5	7	12	0.0408883	significant	indel-	consistent
b0647	Zm00001d012855	5	1124569	1127670	-	5:1128157-1129139	5:1055341-1055343	B73	487	5:1127962-1128157	5:1129139-1129336	982	496	0.505092	TE-InDel	DNA/PIF-Harbinger	GRMZM2G112003	29.81	-0.74991	0.682701	MO17	indel-	11	5	16	0.680805	ns
b0648	Zm00001d012881	5	1566875	1569101	-	5:1569324-1569981	5:1447392-1447418	B73	223	5:1569125-1569324	5:1569981-1570180	657	329	0.500761	TE-InDel	LTR/Copia	GRMZM2G448001	18.3709	-0.434827	0.559728	MO17	indel-	6	10	16	0.843977	ns
b0649	Zm00001d012881	5	1566875	1569101	-	5:1571251-1571289	5:1449453-1449642	Mo17	2150	5:1571053-1571251	5:1571289-1571410	189	155	0.820106	TE-InDel	DNA/TcMar-Stowaway	GRMZM2G448001	18.3709	-0.434827	0.559728	MO17	indel+	5	3	8	0.567037	ns
b0650	Zm00001d012883	5	1584315	1587019	-	5:1587552-1587731	5:1466258-1466261	B73	533	5:1587353-1587552	5:1587731-1587932	179	179	1	TE-InDel	DNA/Helitron	GRMZM2G148937	28.6917	0.359786	0.62394	B73	indel+	2	14	16	0.58353	ns
b0651	Zm00001d012883	5	1584315	1587019	-	5:1590364-1590379	5:1468909-1469068	Mo17	3360	5:1590182-1590379	5:1590364-1590564	159	155	0.974843	TE-InDel	SINE/tRNA	GRMZM2G148937	28.6917	0.359786	0.62394	B73	indel-	1	12	13
b0652	Zm00001d012917	5	1934208	1936982	+	5:1933332-1933930	5:1745029-1745032	B73	278	5:1933133-1933332	5:1933930-1934117	598	380	0.635452	TE-InDel	DNA/PIF-Harbinger	GRMZM2G100524	47.0175	0.63708	0.735753	B73	indel+	15	1	16
b0653	Zm00001d012921	5	1959713	1963560	-	5:1963970-1963973	5:1833464-1833592	Mo17	413	5:1963799-1963973	5:1963970-1964170	128	128	1	TE-InDel	DNA/PIF-Harbinger	GRMZM2G100419	23.9653	1.76993	0.530871	B73	indel-	2	12	14	0.705623	ns
b0654	Zm00001d012932	5	2183943	2186302	-	5:2187705-2188019	5:2046796-2046799	B73	1403	5:2187506-2187705	5:2188019-2188218	314	32	0.101911	TE-InDel	Simple_repeat	GRMZM2G121840	65.277	5.88982	0.9014	B73	indel+	9	7	16	0.083588	ns
b0655	Zm00001d012954	5	2343012	2343815	-	5:2344573-2345181	5:2221371-2221374	B73	758	5:2344374-2344573	5:2345181-2345381	608	330	0.542763	TE-InDel	DNA/PIF-Harbinger	GRMZM2G144008	36.8066	1.8869	0.701098	B73	indel+	3	13	16	0.631432	ns
b0656	Zm00001d013023	5	3417817	3427573	+	5:3414424-3417551	5:3079409-3079428	B73	266	5:3414225-3414424	5:3417551-3417752	3127	2813	0.899584	TE-InDel	LTR/Gypsy	AC210013.4_FG008	49.9802	1.90605	0.816074	B73	indel+	8	8	16	0.268962	ns
b0657	Zm00001d013095	5	4680234	4684555	-	5:4685532-4685533	5:4494010-4496328	Mo17	978	5:4685338-4685533	5:4685532-4685732	2318	2318	1	TE-InDel	LTR/Gypsy	GRMZM5G897818	33.2581	2.69272	0.545935	B73	indel-	2	7	9	0.613813	ns
b0658	Zm00001d013112	5	4870603	4876553	+	5:4870140-4870267	5:4705479-4705481	B73	336	5:4869943-4870140	5:4870267-4870467	127	126	0.992126	TE-InDel	DNA	GRMZM2G028813	38.9459	-2.18736	0.693214	MO17	indel-	8	8	16	0.224275	ns
b0659	Zm00001d013113	5	4876757	4878827	+	5:4875024-4875824	5:4710230-4710237	B73	933	5:4874825-4875024	5:4875824-4876024	800	800	1	TE-InDel	DNA/hAT	GRMZM2G029101	28.0393	-0.850063	0.703319	MO17	indel-	4	12	16	0.569783	ns
b0660	Zm00001d013151	5	5453473	5454938	-	5:5455414-5455417	5:5378455-5378802	Mo17	479	5:5455235-5455417	5:5455414-5455515	347	210	0.605187	TE-InDel	DNA/PIF-Harbinger	GRMZM2G112548	29.9466	0.132592	0.702569	B73	indel-	9	4	13	0.948678	ns
b0661	Zm00001d013195	5	6186788	6189857	+	5:6181989-6185376	5:6062791-6062792	B73	1412	5:6181790-6181989	5:6185376-6185577	3387	3387	1	TE-InDel	DNA/PIF-Harbinger	GRMZM2G114557	36.8625	2.36728	0.692978	B73	indel+	3	13	16	0.212007	ns
b0662	Zm00001d013222	5	6718595	6719557	+	5:6716667-6716676	5:6506519-6506734	Mo17	1919	5:6716468-6716667	5:6716676-6716875	215	215	1	TE-InDel	DNA	GRMZM2G077034	27.2009	3.92432	0.625884	B73	indel-	7	7	14	0.693359	ns
b0663	Zm00001d013241	5	6896879	6902925	-	5:6905754-6906019	5:6660648-6660651	B73	2829	5:6905555-6905754	5:6906019-6906211	265	0	0	none-TE-InDel		GRMZM2G057623	22.3621	1.60244	0.528389	B73	indel+	12	4	16	0.0479109	significant	indel+	consistent
b0664	Zm00001d013241	5	6896879	6902925	-	5:6907658-6907663	5:6662306-6662453	Mo17	4738	5:6907458-6907663	5:6907658-6907858	147	147	1	TE-InDel	DNA	GRMZM2G057623	22.3621	1.60244	0.528389	B73	indel-	3	9	12	0.122726	ns
b0665	Zm00001d013263	5	7387191	7388959	-	5:7389148-7389150	5:7034427-7034792	Mo17	191	5:7388950-7389150	5:7389148-7389348	365	296	0.810959	TE-InDel	DNA	GRMZM2G129865	30.3757	-0.675503	0.709726	MO17	indel+	6	6	12	0.0769135	ns
b0666	Zm00001d013296	5	7994244	7998113	+	5:7991985-7992679	5:7625355-7625394	B73	1565	5:7991782-7991985	5:7992679-7992878	694	581	0.837176	TE-InDel	LTR/Copia	GRMZM2G051270	32.4955	9.58547	0.675802	B73	indel+	4	12	16	0.995256	ns
b0667	Zm00001d013339	5	8899703	8902903	+	5:8899362-8899376	5:8692625-8693199	Mo17	341	5:8899176-8899376	5:8899362-8899547	574	567	0.987805	TE-InDel	LINE/L1	GRMZM2G064042	60.7325	3.6972	0.885533	B73	indel-	7	6	13	0.453454	ns
b0668	Zm00001d013339	5	8899703	8902903	+	5:8899547-8899550	5:8693383-8697443	Mo17	153	5:8899362-8899547	5:8899550-8899749	4060	1995	0.491379	TE-InDel	LTR/Copia	GRMZM2G064042	60.7325	3.6972	0.885533	B73	indel-	5	6	11	0.134059	ns
b0670	Zm00001d013415	5	10714255	10718463	+	5:10713600-10713604	5:9912798-9913937	Mo17	655	5:10713406-10713604	5:10713600-10713800	1139	1124	0.986831	TE-InDel	LTR/Copia	GRMZM2G158359	48.6654	8.27367	0.710616	B73	indel-	0	12	12
b0671	Zm00001d013415	5	10714255	10718463	+	5:10713965-10713981	5:9914321-9914848	Mo17	290	5:10713765-10713981	5:10713965-10714092	527	329	0.624288	TE-InDel	DNA/hAT	GRMZM2G158359	48.6654	8.27367	0.710616	B73	indel-	2	14	16	0.310245	ns
b0672	Zm00001d013415	5	10714255	10718463	+	5:10714083-10714092	5:9914975-9916101	Mo17	172	5:10713965-10714092	5:10714083-10714292	1126	1126	1	TE-InDel	DNA/MuDR	GRMZM2G158359	48.6654	8.27367	0.710616	B73	indel-	0	15	15
b0673	Zm00001d013481	5	12593717	12595030	-	5:12595802-12595802	5:11931938-11932094	Mo17	772	5:12595603-12595802	5:12595802-12596003	156	156	1	TE-InDel	DNA	GRMZM2G452026	45.6442	2.14125	0.820367	B73	indel-	1	10	11
b0674	Zm00001d013481	5	12593717	12595030	-	5:12598965-12598998	5:11933208-11935946	Mo17	3968	5:12598796-12598998	5:12598965-12599162	2738	1981	0.723521	TE-InDel	LTR/Copia	GRMZM2G452026	45.6442	2.14125	0.820367	B73	indel-	2	12	14	0.767955	ns
b0675	Zm00001d013493	5	12701180	12706156	-	5:12706341-12706461	5:12121551-12121552	B73	185	5:12706141-12706341	5:12706461-12706659	120	119	0.991667	TE-InDel	DNA	GRMZM2G102760	52.1426	38.2297	0.805971	B73	indel+	12	4	16	0.370595	ns
b0676	Zm00001d013506	5	12949143	12955205	-	5:12956537-12958151	5:12543744-12543746	B73	1332	5:12956340-12956537	5:12958151-12958351	1614	495	0.306691	TE-InDel	DNA	GRMZM2G412229	34.0321	0.45718	0.655791	B73	indel+	8	8	16	0.837914	ns
b0677	Zm00001d013529	5	13659653	13664953	+	5:13659540-13659548	5:13216919-13217449	Mo17	113	5:13659356-13659548	5:13659540-13659730	530	530	1	TE-InDel	DNA/hAT	GRMZM2G122251	20.5903	0.683276	0.528867	B73	indel-	2	7	9	0.352561	ns
b0679	Zm00001d013544	5	13969116	13975546	+	5:13967817-13968453	5:13619988-13619988	B73	663	5:13967618-13967817	5:13968453-13968654	636	590	0.927673	TE-InDel	DNA/PIF-Harbinger	GRMZM2G161222	19.6642	1.85032	0.623545	B73	indel+	4	12	16	0.0445547	significant	indel-	inconsistent
b0680	Zm00001d013551	5	14090858	14091355	-	5:14091566-14091721	5:13729509-13729537	B73	211	5:14091367-14091566	5:14091721-14091923	155	0	0	none-TE-InDel		GRMZM2G129083	52.2292	6.10056	0.865635	B73	indel+	11	4	15	0.0623794	ns
b0681	Zm00001d013555	5	14173339	14176278	-	5:14179681-14180104	5:13763088-13763090	B73	3403	5:14179491-14179681	5:14180104-14180300	423	261	0.617021	TE-InDel	DNA/PIF-Harbinger	GRMZM2G033612	65.1924	-6.74456	0.848349	MO17	indel-	9	7	16	0.532793	ns
b0682	Zm00001d013555	5	14173339	14176278	-	5:14180604-14180889	5:13763602-13763605	B73	4326	5:14180405-14180604	5:14180889-14181092	285	150	0.526316	TE-InDel	DNA/hAT	GRMZM2G033612	65.1924	-6.74456	0.848349	MO17	indel-	6	10	16	0.516139	ns
b0684	Zm00001d013658	5	16521867	16525445	-	5:16526980-16526990	5:15963349-15963536	Mo17	1545	5:16526793-16526990	5:16526980-16527180	187	187	1	TE-InDel	Simple_repeat	AC233885.1_FG001	43.4242	1.41885	0.780796	B73	indel-	4	9	13	0.46736	ns
b0685	Zm00001d013757	5	19521784	19529525	+	5:19521129-19521649	5:18763253-18763254	B73	135	5:19520930-19521129	5:19521649-19521851	520	265	0.509615	TE-InDel	DNA/PIF-Harbinger	GRMZM2G375984	45.1202	11.6326	0.767514	B73	indel+	5	11	16	0.163505	ns
b0686	Zm00001d014007	5	28477643	28478182	+	5:28473319-28473321	5:28056489-28056885	Mo17	4324	5:28473122-28473321	5:28473319-28473519	396	228	0.575758	TE-InDel	DNA/PIF-Harbinger	GRMZM2G405090	42.5159	7.00058	0.79536	B73	indel-	2	11	13	0.507619	ns
b0687	Zm00001d014007	5	28477643	28478182	+	5:28477412-28477433	5:28060586-28061101	Mo17	210	5:28477222-28477412	5:28477433-28477632	515	491	0.953398	TE-InDel	DNA/hAT	GRMZM2G405090	42.5159	7.00058	0.79536	B73	indel-	8	7	15	0.789387	ns
b0688	Zm00001d014037	5	30097117	30113105	-	5:30113801-30115742	5:29681219-29681226	B73	696	5:30113602-30113801	5:30115742-30115939	1941	1598	0.823287	TE-InDel	DNA/hAT	GRMZM2G104254	30.7312	-2.32487	0.503624	MO17	indel-	2	14	16	0.0428419	significant	indel-	consistent
b0689	Zm00001d014094	5	32207822	32212251	-	5:32212686-32212687	5:32104938-32105595	Mo17	436	5:32212495-32212687	5:32212686-32212886	657	583	0.887367	TE-InDel	DNA	GRMZM2G102639	43.5244	-3.37144	0.804883	MO17	indel+	1	14	15
b0690	Zm00001d014175	5	34988400	34994302	+	5:34988314-34988314	5:34784103-34787908	Mo17	86	5:34988117-34988314	5:34988314-34988514	3805	147	0.0386334	TE-InDel	LTR/Copia	GRMZM2G046021	40.8069	2.5188	0.726866	B73	indel-	2	14	16	0.0805793	ns
b0691	Zm00001d014557	5	53037190	53040873	-	5:53043187-53043536	5:52219942-52219944	B73	2314	5:53042990-53043187	5:53043536-53043672	349	258	0.739255	TE-InDel	LTR/Gypsy	GRMZM2G177570	37.5343	-0.54535	0.649315	MO17	indel-	13	3	16	0.518747	ns
b0692	Zm00001d014608	5	55120384	55123266	+	5:55119845-55119855	5:54235729-54236550	Mo17	539	5:55119668-55119855	5:55119845-55120048	821	821	1	TE-InDel	DNA/hAT	GRMZM2G080183	26.1649	0.837143	0.532959	B73	indel-	4	10	14	0.581705	ns
b0693	Zm00001d014696	5	59771775	59774538	+	5:59771072-59771135	5:58797634-58797811	Mo17	640	5:59770875-59771072	5:59771135-59771326	177	125	0.706215	TE-InDel	DNA/PIF-Harbinger	GRMZM2G178371	50.6119	3.26895	0.840868	B73	indel-	6	4	10	0.221812	ns
b0694	Zm00001d014760	5	61826956	61833388	+	5:61826255-61826256	5:60726694-60729774	Mo17	701	5:61826057-61826256	5:61826255-61826455	3080	2727	0.88539	TE-InDel	LTR/Cassandra	GRMZM2G116243	25.5104	0.81683	0.597602	B73	indel-	4	8	12	0.597728	ns
b0697	Zm00001d015008	5	72033745	72039909	-	5:72040097-72040100	5:71367662-71367953	Mo17	188	5:72039905-72040097	5:72040100-72040311	291	284	0.975945	TE-InDel	DNA/PIF-Harbinger	GRMZM2G098370	47.5689	2.18455	0.796233	B73	indel-	3	7	10	0.0502939	ns
b0698	Zm00001d015032	5	72787738	72794488	-	5:72795097-72795396	5:72030749-72030755	B73	609	5:72794902-72795097	5:72795396-72795595	299	294	0.983278	TE-InDel	DNA/PIF-Harbinger	GRMZM2G164242	23.3949	-0.108237	0.507361	MO17	indel-	10	6	16	0.0506736	ns
b0701	Zm00001d015065	5	73929573	73937751	-	5:73937879-73937888	5:73068884-73069043	Mo17	137	5:73937697-73937888	5:73937879-73938085	159	0	0	none-TE-InDel		GRMZM5G872147	40.6383	10.6796	0.74141	B73	indel-	4	9	13	0.125731	ns
b0702	Zm00001d015184	5	78677042	78680091	-	5:78681255-78681257	5:77312075-77312192	Mo17	1166	5:78681055-78681257	5:78681255-78681432	117	0	0	none-TE-InDel		GRMZM2G139714	57.9768	-5.29209	0.86273	MO17	indel+	11	3	14	0.0186229	significant	indel+	consistent
b0703	Zm00001d015186	5	78725619	78727794	+	5:78725231-78725239	5:77316044-77316643	Mo17	388	5:78725027-78725239	5:78725231-78725430	599	599	1	TE-InDel	DNA/hAT	GRMZM2G062552	38.2473	2.01079	0.610802	B73	indel-	8	5	13	0.876995	ns
b0704	Zm00001d015212	5	79554503	79570576	-	5:79570648-79570828	5:78196702-78196704	B73	72	5:79570449-79570648	5:79570828-79571011	180	171	0.95	TE-InDel	DNA/Helitron	GRMZM2G319573	89.6269	11.8991	0.920673	B73	indel+	10	6	16	0.0214487	significant	indel+	consistent
b0705	Zm00001d015363	5	86312926	86314650	-	5:86315421-86315423	5:84784379-84784498	Mo17	773	5:86315223-86315423	5:86315421-86315581	119	114	0.957983	TE-InDel	DNA/Helitron	GRMZM2G017802	54.8941	3.96394	0.889377	B73	indel-	3	8	11	0.204103	ns
b0707	Zm00001d016149	5	147041671	147044167	-	5:147044771-147045316	5:145001885-145001892	B73	604	5:147044572-147044771	5:147045316-147045521	545	396	0.726606	TE-InDel	DNA/PIF-Harbinger	GRMZM2G114675	38.7769	6.87875	0.701108	B73	indel+	3	13	16	0.593463	ns
b0708	Zm00001d016277	5	155417891	155421796	+	5:155414414-155414786	5:154181975-154181987	B73	3105	5:155414221-155414414	5:155414786-155414985	372	277	0.744624	TE-InDel	DNA/PIF-Harbinger	GRMZM2G121309	41.5768	8.93667	0.78499	B73	indel+	12	3	15	0.784679	ns
b0709	Zm00001d016299	5	156137453	156146644	-	5:156146771-156147086	5:154708135-154708138	B73	127	5:156146572-156146771	5:156147086-156147249	315	308	0.977778	TE-InDel	DNA/PIF-Harbinger	GRMZM2G161299	39.3442	1.09433	0.729625	B73	indel+	12	4	16	0.0341706	significant	indel+	consistent
b0710	Zm00001d016438	5	162295105	162296658	+	5:162293826-162293981	5:160471173-160471180	B73	1124	5:162293627-162293826	5:162293981-162294160	155	155	1	TE-InDel	DNA/Helitron	GRMZM2G569948	24.6873	0.650539	0.625516	B73	indel+	6	10	16	0.864714	ns
b0711	Zm00001d016491	5	164555551	164557626	+	5:164554521-164554526	5:163120445-163120690	Mo17	1030	5:164554323-164554526	5:164554521-164554721	245	211	0.861224	TE-InDel	DNA/PIF-Harbinger	GRMZM2G377600	21.2746	-7.03799	0.500942	MO17	indel+	2	14	16	0.529102	ns
b0712	Zm00001d016530	5	166555478	166563550	+	5:166551923-166555178	5:164873542-164873554	B73	300	5:166551724-166551923	5:166555178-166555380	3255	3255	1	TE-InDel	DNA/MuDR	GRMZM2G092991	22.0614	0.605568	0.559576	B73	indel+	8	8	16	0.230264	ns
b0713	Zm00001d016800	5	176392556	176394945	-	5:176395448-176395453	5:174091406-174091541	Mo17	508	5:176395254-176395453	5:176395448-176395635	135	135	1	TE-InDel	DNA	GRMZM2G139035	30.6898	1.02078	0.634273	B73	indel-	5	7	12	0.000260805	significant	indel-	consistent	yes	31.5961	1.2229e-07
b0714	Zm00001d016800	5	176392556	176394945	-	5:176395876-176396046	5:174091984-174091986	B73	931	5:176395677-176395876	5:176396046-176396222	170	169	0.994118	TE-InDel	DNA/PIF-Harbinger	GRMZM2G139035	30.6898	1.02078	0.634273	B73	indel+	6	10	16	5.70783e-05	significant	indel+	consistent
b0715	Zm00001d016860	5	178504960	178508727	-	5:178512036-178512047	5:175710209-175710642	Mo17	3320	5:178511857-178512047	5:178512036-178512232	433	270	0.623557	TE-InDel	DNA/MuDR	GRMZM2G064255	35.3942	-2.11387	0.538209	MO17	indel+	9	4	13	0.759592	ns
b0716	Zm00001d016902	5	179645061	179649671	-	5:179650128-179650132	5:176791386-176792062	Mo17	457	5:179649930-179650128	5:179650132-179650320	676	76	0.112426	TE-InDel	DNA/PIF-Harbinger	GRMZM2G105466	28.342	2.0615	0.552463	B73	indel-	14	2	16	0.88306	ns
b0718	Zm00001d017070	5	184384820	184385557	-	5:184389369-184389374	5:180865165-180865751	Mo17	3817	5:184389180-184389374	5:184389369-184389569	586	548	0.935154	TE-InDel	DNA/hAT	GRMZM2G092743	40.2524	-7.29608	0.739942	MO17	indel+	5	10	15	0.00284319	significant	indel+	consistent
b0719	Zm00001d017096	5	185267329	185270693	-	5:185272037-185272039	5:181738526-181738921	Mo17	1346	5:185271838-185272039	5:185272037-185272236	395	389	0.98481	TE-InDel	DNA/hAT	GRMZM2G179308	39.4384	4.97682	0.680749	B73	indel-	2	11	13	0.378453	ns
b0720	Zm00001d017119	5	185977855	185983439	+	5:185974083-185974522	5:182322058-182322059	B73	3333	5:185973884-185974083	5:185974522-185974719	439	357	0.813212	TE-InDel	LTR/Gypsy	GRMZM2G031107	42.9773	3.17384	0.739051	B73	indel+	8	8	16	0.208787	ns
b0721	Zm00001d017247	5	190232645	190237410	-	5:190238751-190238936	5:186266761-186266768	B73	1341	5:190238554-190238751	5:190238936-190239135	185	169	0.913514	TE-InDel	DNA	GRMZM2G094602	29.151	-1.35771	0.685373	MO17	indel-	6	10	16	0.175637	ns
b0722	Zm00001d017398	5	194871845	194884885	+	5:194871343-194871582	5:191110769-191110777	B73	263	5:194871145-194871343	5:194871582-194871755	239	238	0.995816	TE-InDel	DNA/MuDR	GRMZM2G162786	40.7442	4.00888	0.77201	B73	indel+	7	9	16	0.901182	ns
b0723	Zm00001d017445	5	196086107	196090434	-	5:196094179-196094187	5:192257508-192257898	Mo17	3745	5:196093995-196094179	5:196094187-196094380	390	0	0	none-TE-InDel		GRMZM2G031952	27.3049	2.23363	0.577812	B73	indel-	6	6	12	0.512653	ns
b0724	Zm00001d017445	5	196086107	196090434	-	5:196094609-196094654	5:192258308-192258460	Mo17	4175	5:196094410-196094609	5:196094654-196094810	152	0	0	none-TE-InDel		GRMZM2G031952	27.3049	2.23363	0.577812	B73	indel-	2	10	12	0.76661	ns
b0725	Zm00001d017476	5	197139091	197145688	+	5:197138612-197138618	5:193002260-193003902	Mo17	479	5:197138419-197138618	5:197138612-197138809	1642	1229	0.748477	TE-InDel	DNA/MuDR	GRMZM2G118731	39.7572	-3.9705	0.751195	MO17	indel+	3	11	14	0.145781	ns
b0726	Zm00001d017492	5	197502471	197507129	-	5:197507219-197507228	5:193407487-193408971	Mo17	99	5:197507041-197507228	5:197507219-197507388	1484	1484	1	TE-InDel	DNA/MuDR	GRMZM2G119490	50.7538	2.5248	0.807174	B73	indel-	8	6	14	0.237243	ns
b0727	Zm00001d017503	5	197730625	197735534	-	5:197735706-197735708	5:193762739-193763087	Mo17	174	5:197735510-197735708	5:197735706-197735903	348	345	0.991379	TE-InDel	DNA/PIF-Harbinger	GRMZM2G112914	30.146	1.04032	0.626416	B73	indel-	2	11	13	0.298949	ns
b0728	Zm00001d017503	5	197730625	197735534	-	5:197735978-197736051	5:193763365-193763588	Mo17	444	5:197735783-197735978	5:197736051-197736242	223	0	0	none-TE-InDel		GRMZM2G112914	30.146	1.04032	0.626416	B73	indel-	1	14	15
b0729	Zm00001d017529	5	198871925	198872722	+	5:198869732-198870364	5:194965579-194965580	B73	1561	5:198869539-198869732	5:198870364-198870538	632	346	0.547468	TE-InDel	DNA/hAT	GRMZM2G061938	56.6117	8.5748	0.86874	B73	indel+	6	10	16	0.0505408	ns
b0730	Zm00001d017531	5	198880654	198882279	+	5:198876480-198876489	5:194973545-194973680	Mo17	4165	5:198876281-198876480	5:198876489-198876688	135	128	0.948148	TE-InDel	DNA/PIF-Harbinger	GRMZM2G362848	39.8257	-0.559397	0.787331	MO17	indel+	4	10	14	0.600884	ns
b0731	Zm00001d017807	5	207375638	207378185	+	5:207375426-207375440	5:203476075-203476297	Mo17	198	5:207375297-207375426	5:207375440-207375634	222	74	0.333333	TE-InDel	DNA	GRMZM2G009426	28.7738	-0.860595	0.668389	MO17	indel+	7	5	12	0.700296	ns
b0732	Zm00001d017814	5	207564435	207564833	-	5:207565124-207565266	5:203705351-203705352	B73	291	5:207564929-207565124	5:207565266-207565467	142	142	1	TE-InDel	LTR/Gypsy	GRMZM2G341957	21.2845	0.159996	0.568946	B73	indel+	5	11	16
b0733	Zm00001d017849	5	208733011	208737362	-	5:208739511-208741044	5:205002862-205002874	B73	2149	5:208739312-208739511	5:208741044-208741256	1533	1346	0.878017	TE-InDel	DNA/Helitron	GRMZM2G459110	22.9916	-0.0690378	0.582677	MO17	indel-	8	8	16	0.791007	ns
b0734	Zm00001d017937	5	210385310	210401948	-	5:210402050-210402591	5:206706851-206706866	B73	102	5:210401837-210402050	5:210402591-210402780	541	541	1	TE-InDel	DNA/hAT	GRMZM2G042027	30.9865	-1.86354	0.691341	MO17	indel-	10	6	16	0.254619	ns
b0735	Zm00001d017949	5	210674350	210677138	+	5:210672696-210673841	5:207177250-207177284	B73	509	5:210672497-210672696	5:210673841-210674047	1145	821	0.717031	TE-InDel	DNA/hAT	GRMZM2G076049	36.1266	15.5331	0.71835	B73	indel+	13	3	16	0.650741	ns
b0736	Zm00001d017957	5	210861055	210866038	+	5:210859954-210860818	5:207441514-207441594	B73	237	5:210859763-210859954	5:210860818-210861011	864	818	0.946759	TE-InDel	DNA/PIF-Harbinger	GRMZM2G090981	20.7308	1.50839	0.522829	B73	indel+	8	7	15	0.134939	ns
b0737	Zm00001d017966	5	210969323	210974977	-	5:210976432-210976608	5:207703603-207703622	B73	1455	5:210976235-210976432	5:210976608-210976805	176	158	0.897727	TE-InDel	DNA/hAT	GRMZM2G181505	33.2124	3.70953	0.677098	B73	indel+	4	12	16	0.706755	ns
b0738	Zm00001d017968	5	211000353	211000697	-	5:211002343-211002344	5:207716673-207716906	Mo17	1647	5:211002206-211002344	5:211002343-211002543	233	167	0.716738	TE-InDel	DNA/hAT	GRMZM2G059496	29.2384	0.915943	0.600193	B73	indel-	4	10	14	0.017369	significant	indel-	consistent
b0739	Zm00001d017968	5	211000353	211000697	-	5:211003630-211003632	5:207718489-207719004	Mo17	2933	5:211003431-211003630	5:211003632-211003740	515	163	0.316505	TE-InDel	DNA/Helitron	GRMZM2G059496	29.2384	0.915943	0.600193	B73	indel-	2	3	5	0.155924	ns
b0740	Zm00001d018208	5	216608861	216609928	-	5:216611319-216611332	5:213157273-213157399	Mo17	1391	5:216611120-216611319	5:216611332-216611531	126	121	0.960317	TE-InDel	DNA/PIF-Harbinger	GRMZM2G083886	46.0452	8.49208	0.790268	B73	indel-	1	10	11
b0741	Zm00001d018211	5	216633702	216636170	+	5:216631812-216631813	5:213201483-213201758	Mo17	1890	5:216631612-216631813	5:216631812-216632012	275	273	0.992727	TE-InDel	DNA/PIF-Harbinger	GRMZM2G052422	33.2428	12.3087	0.68831	B73	indel-	1	6	7
b0742	Zm00001d018218	5	216753835	216756759	+	5:216749838-216749843	5:213339545-213340185	Mo17	3997	5:216749644-216749843	5:216749838-216750038	640	640	1	TE-InDel	DNA/hAT	GRMZM2G046288	48.0179	1.21223	0.81207	B73	indel-	0	15	15
b0743	Zm00001d018218	5	216753835	216756759	+	5:216752496-216753059	5:213342847-213342850	B73	776	5:216752299-216752496	5:216753059-216753257	563	563	1	TE-InDel	DNA/PIF-Harbinger	GRMZM2G046288	48.0179	1.21223	0.81207	B73	indel+	4	12	16	0.00059456	significant	indel+	consistent
b0744	Zm00001d018229	5	217043870	217045452	+	5:217041042-217041051	5:213625684-213626610	Mo17	2828	5:217040842-217041051	5:217041042-217041242	926	862	0.930886	TE-InDel	DNA/hAT	GRMZM2G151425	24.1751	-0.196733	0.566913	MO17	indel+	1	15	16
b0745	Zm00001d018229	5	217043870	217045452	+	5:217042243-217042247	5:213627774-213628182	Mo17	1623	5:217042044-217042243	5:217042247-217042449	408	348	0.852941	TE-InDel	DNA	GRMZM2G151425	24.1751	-0.196733	0.566913	MO17	indel+	1	11	12
b0746	Zm00001d018259	5	217540268	217543540	-	5:217544503-217544507	5:213963775-213964946	Mo17	967	5:217544305-217544507	5:217544503-217544703	1171	1170	0.999146	TE-InDel	LTR/Gypsy	GRMZM5G842517	33.8155	0.762218	0.706793	B73	indel-	8	6	14	0.0386912	significant	indel+	inconsistent
b0747	Zm00001d018280	5	217830621	217837326	+	5:217830098-217830358	5:214347103-214347108	B73	263	5:217829899-217830098	5:217830358-217830556	260	135	0.519231	TE-InDel	DNA/Mariner	GRMZM2G332560	25.9583	0.570743	0.529948	B73	indel+	9	7	16	0.608933	ns
b0748	Zm00001d018284	5	217895146	217895547	+	5:217894450-217894876	5:214396497-214396505	B73	270	5:217894251-217894450	5:217894876-217895080	426	403	0.946009	TE-InDel	DNA/hAT	GRMZM2G039864	24.4517	0.563386	0.591825	B73	indel+	10	6	16	0.0525722	ns
b0749	Zm00001d018290	5	218022410	218026606	-	5:218027600-218027607	5:214475760-214476331	Mo17	1001	5:218027408-218027607	5:218027600-218027800	571	571	1	TE-InDel	DNA/hAT	GRMZM2G124416	61.8688	2.62869	0.813842	B73	indel-	0	15	15
b0750	Zm00001d018305	5	218213866	218216075	-	5:218217454-218218924	5:214771568-214771570	B73	1379	5:218217255-218217454	5:218218924-218219101	1470	1009	0.686395	TE-InDel	DNA/hAT	GRMZM2G110333	31.0222	-1.66864	0.636745	MO17	indel-	5	11	16	0.22229	ns
b0753	Zm00001d018326	5	218492798	218493868	-	5:218494686-218495143	5:215051105-215051115	B73	818	5:218494487-218494686	5:218495143-218495345	457	223	0.487965	TE-InDel	DNA	GRMZM5G878379	45.2722	2.63824	0.793632	B73	indel+	10	5	15	0.48436	ns
b0755	Zm00001d018369	5	219413422	219418916	+	5:219412646-219412660	5:215799885-215800024	Mo17	762	5:219412443-219412646	5:219412660-219412858	139	54	0.388489	TE-InDel	DNA/PIF-Harbinger	GRMZM5G879749	37.1788	5.58077	0.730941	B73	indel-	12	3	15	0.715638	ns
b0756	Zm00001d018371	5	219425678	219440046	-	5:219441254-219441323	5:215840063-215840402	Mo17	1208	5:219441055-219441254	5:219441323-219441522	339	130	0.383481	TE-InDel	DNA	GRMZM2G178996	25.1758	0.489575	0.527047	B73	indel-	7	6	13	0.056979	ns
b0757	Zm00001d018399	5	219982191	219988382	+	5:219980749-219981190	5:216415596-216415603	B73	1001	5:219980593-219980749	5:219981190-219981378	441	424	0.961451	TE-InDel	DNA/hAT	GRMZM2G180422	28.4024	-3.71656	0.66227	MO17	indel-	6	10	16	0.942011	ns
b0758	Zm00001d018452	5	221122059	221123875	+	5:221121633-221121636	5:217722955-217723301	Mo17	426	5:221121437-221121636	5:221121633-221121835	346	290	0.83815	TE-InDel	DNA/PIF-Harbinger	GRMZM5G862817	27.3847	-1.7762	0.593356	MO17	indel+	5	4	9	0.367923	ns
b0760	Zm00001d018479	5	221521586	221525322	+	5:221516857-221517049	5:218216672-218216676	B73	4537	5:221516658-221516857	5:221517049-221517198	192	192	1	TE-InDel	DNA/MuDR	GRMZM2G143651	40.2379	7.33249	0.723844	B73	indel+	5	11	16	0.375717	ns
b0762	Zm00001d035051	6	3226476	3230772	-	6:3233811-3233814	6:3571453-3571592	Mo17	3042	6:3233615-3233814	6:3233811-3234011	139	138	0.992806	TE-InDel	DNA	GRMZM2G457699	24.9478	1.01362	0.570976	B73	indel-	1	14	15
b0763	Zm00001d035170	6	7517294	7521650	+	6:7516136-7516143	6:7923556-7924310	Mo17	1158	6:7515936-7516143	6:7516136-7516336	754	752	0.997347	TE-InDel	Simple_repeat	GRMZM2G057026	52.0814	2.81298	0.865173	B73	indel-	2	3	5	0.0467636	significant	indel+	inconsistent
b0764	Zm00001d035875	6	58228914	58237829	+	6:58224748-58224966	6:51672352-51672356	B73	3948	6:58224549-58224748	6:58224966-58225167	218	217	0.995413	TE-InDel	DNA/EnSpm/CACTA	GRMZM2G463462	51.2905	1.01954	0.727854	B73	indel+	12	4	16	0.210792	ns
b0765	Zm00001d035875	6	58228914	58237829	+	6:58226600-58227207	6:51673946-51673971	B73	1707	6:58226404-58226600	6:58227207-58227406	607	549	0.904448	TE-InDel	Simple_repeat	GRMZM2G463462	51.2905	1.01954	0.727854	B73	indel+	11	5	16	0.00603748	significant	indel+	consistent
b0766	Zm00001d036296	6	82463657	82474161	-	6:82476712-82476780	6:78042074-78042958	Mo17	2551	6:82476513-82476712	6:82476780-82476981	884	870	0.984163	TE-InDel	DNA/EnSpm/CACTA	GRMZM2G157820	25.101	3.41963	0.49908	B73	indel-	2	12	14	0.522287	ns
b0767	Zm00001d036610	6	94241463	94242644	+	6:94240587-94240720	6:90505326-90505337	B73	743	6:94240388-94240587	6:94240720-94240921	133	127	0.954887	TE-InDel	LTR/Gypsy	GRMZM2G128560	25.2097	0.527022	0.578099	B73	indel+	6	10	16	0.172544	ns
b0768	Zm00001d036623	6	95057231	95057635	-	6:95057896-95058698	6:91171911-91171944	B73	261	6:95057701-95057896	6:95058698-95058895	802	799	0.996259	TE-InDel	DNA/hAT	GRMZM2G462760	29.1774	0.42441	0.607182	B73	indel+	14	2	16	0.0975174	ns
b0769	Zm00001d036751	6	99767852	99771038	+	6:99765283-99765285	6:95992675-95993091	Mo17	2569	6:99765103-99765285	6:99765283-99765484	416	379	0.911058	TE-InDel	DNA/PIF-Harbinger	GRMZM2G169333	39.5638	1.45816	0.7672	B73	indel-	7	6	13	0.187912	ns
b0770	Zm00001d036751	6	99767852	99771038	+	6:99765505-99765540	6:95993314-95993660	Mo17	2312	6:99765307-99765505	6:99765540-99765739	346	330	0.953757	TE-InDel	DNA/PIF-Harbinger	GRMZM2G169333	39.5638	1.45816	0.7672	B73	indel-	4	9	13	0.819417	ns
b0771	Zm00001d036830	6	103104796	103110112	-	6:103113666-103113668	6:99064268-99065036	Mo17	3556	6:103113469-103113668	6:103113666-103113865	768	768	1	TE-InDel	DNA/PIF-Harbinger	GRMZM2G071582	62.5746	2.21106	0.893473	B73	indel-	4	10	14	0.254284	ns
b0773	Zm00001d036917	6	106360618	106367670	-	6:106368204-106368213	6:102117501-102117771	Mo17	534	6:106368005-106368204	6:106368213-106368415	270	262	0.97037	TE-InDel	DNA/PIF-Harbinger	GRMZM2G079080	24.7563	1.18542	0.539486	B73	indel-	4	8	12	0.454707	ns
b0774	Zm00001d036964	6	107568935	107571082	-	6:107571264-107571512	6:103310774-103310787	B73	182	6:107571067-107571264	6:107571512-107571692	248	222	0.895161	TE-InDel	DNA	GRMZM2G178432	64.0428	7.0888	0.926355	B73	indel+	10	6	16	0.339422	ns
b0775	Zm00001d036964	6	107568935	107571082	-	6:107571687-107571692	6:103310967-103311162	Mo17	610	6:107571512-107571692	6:107571687-107571887	195	187	0.958974	TE-InDel	DNA/Helitron	GRMZM2G178432	64.0428	7.0888	0.926355	B73	indel-	2	11	13	0.572045	ns
b0776	Zm00001d037028	6	109547895	109553139	+	6:109546857-109546861	6:105034809-105038235	Mo17	1038	6:109546662-109546861	6:109546857-109547054	3426	1967	0.574139	TE-InDel	LTR/Gypsy	GRMZM2G071638	30.1317	0.778505	0.733356	B73	indel-	1	13	14
b0777	Zm00001d037084	6	111695535	111708346	+	6:111694902-111694911	6:106801503-106802143	Mo17	633	6:111694702-111694911	6:111694902-111695102	640	599	0.935937	TE-InDel	LTR/Gypsy	GRMZM2G154892	38.1022	1.71021	0.675704	B73	indel-	3	10	13	0.485651	ns
b0779	Zm00001d037097	6	112036186	112037588	-	6:112037820-112037823	6:107187483-107187680	Mo17	235	6:112037624-112037823	6:112037820-112038003	197	174	0.883249	TE-InDel	DNA	GRMZM2G116881	23.7152	-1.21353	0.582189	MO17	indel+	5	8	13	0.333422	ns
b0780	Zm00001d037105	6	112386544	112388553	+	6:112381971-112382372	6:107582418-107582422	B73	4172	6:112381773-112381971	6:112382372-112382571	401	0	0	none-TE-InDel		GRMZM2G156986	34.6635	5.74806	0.673762	B73	indel+	14	2	16	0.823585	ns
b0781	Zm00001d037120	6	113001513	113006425	-	6:113006772-113007184	6:108242828-108242829	B73	347	6:113006580-113006772	6:113007184-113007385	412	302	0.73301	TE-InDel	DNA/PIF-Harbinger	AY530952.1_FG001	27.7627	1.71149	0.516947	B73	indel+	5	11	16	0.918066	ns
b0782	Zm00001d037229	6	116920317	116926344	+	6:116918396-116918698	6:111709048-111709055	B73	1619	6:116918197-116918396	6:116918698-116918880	302	0	0	none-TE-InDel		GRMZM2G010433	26.4151	-2.51878	0.614026	MO17	indel-	13	3	16	0.0109094	significant	indel-	consistent
b0783	Zm00001d037270	6	118892566	118895916	-	6:118896128-118896144	6:113386822-113386958	Mo17	212	6:118895929-118896128	6:118896144-118896343	136	129	0.948529	TE-InDel	DNA/PIF-Harbinger	GRMZM2G405133	43.0764	0.180266	0.771713	B73	indel-	7	7	14	0.201152	ns
b0784	Zm00001d037270	6	118892566	118895916	-	6:118897492-118897687	6:113388318-113388319	B73	1576	6:118897293-118897492	6:118897687-118897887	195	0	0	none-TE-InDel		GRMZM2G405133	43.0764	0.180266	0.771713	B73	indel+	8	8	16	0.159409	ns
b0785	Zm00001d037270	6	118892566	118895916	-	6:118898942-118898947	6:113389576-113389743	Mo17	3026	6:118898743-118898942	6:118898947-118899146	167	138	0.826347	TE-InDel	LTR/Copia	GRMZM2G405133	43.0764	0.180266	0.771713	B73	indel-	13	3	16	0.585098	ns
b0786	Zm00001d037273	6	119043969	119047721	+	6:119042602-119043130	6:113538796-113538798	B73	839	6:119042403-119042602	6:119043130-119043319	528	527	0.998106	TE-InDel	DNA/PIF-Harbinger	GRMZM2G025322	37.5786	-1.40682	0.776787	MO17	indel-	5	11	16	0.0994901	ns
b0787	Zm00001d037275	6	119096565	119098065	-	6:119098266-119098602	6:113619036-113619036	B73	201	6:119098079-119098266	6:119098602-119098803	336	323	0.96131	TE-InDel	LTR/Gypsy	GRMZM2G360339	46.1524	27.8072	0.837015	B73	indel+	5	11	16	0.152778	ns
b0788	Zm00001d037289	6	119523282	119528893	-	6:119531438-119531445	6:114160568-114161172	Mo17	2545	6:119531239-119531438	6:119531445-119531646	604	520	0.860927	TE-InDel	DNA/EnSpm/CACTA	GRMZM2G156255	40.2672	-2.57438	0.676743	MO17	indel+	9	4	13	0.38939	ns
b0791	Zm00001d037413	6	124872285	124877763	-	6:124878543-124879925	6:119313005-119313072	B73	780	6:124878355-124878543	6:124879925-124880115	1382	1382	1	TE-InDel	DNA/hAT	GRMZM2G101874	31.7321	-3.44598	0.665083	MO17	indel-	6	10	16	0.000587437	significant	indel-	consistent	yes	9.84235	0.00216622
b0793	Zm00001d037473	6	126451035	126459342	+	6:126449784-126449911	6:120844487-120844491	B73	1124	6:126449585-126449784	6:126449911-126450114	127	126	0.992126	TE-InDel	DNA/PIF-Harbinger	GRMZM2G161102	30.2894	1.21835	0.500869	B73	indel+	7	9	16	0.118254	ns
b0794	Zm00001d037473	6	126451035	126459342	+	6:126450210-126450214	6:120844781-120845454	Mo17	825	6:126450010-126450214	6:126450210-126450410	673	672	0.998514	TE-InDel	LTR/Gypsy	GRMZM2G161102	30.2894	1.21835	0.500869	B73	indel-	6	4	10	0.864766	ns
b0795	Zm00001d037497	6	127269091	127274746	+	6:127268693-127268928	6:121929881-121929882	B73	163	6:127268494-127268693	6:127268928-127269125	235	0	0	none-TE-InDel		GRMZM2G127115	50.9757	1.75192	0.833595	B73	indel+	12	4	16	0.808071	ns
b0796	Zm00001d037616	6	131895109	131897519	-	6:131898745-131898761	6:126402038-126402943	Mo17	1226	6:131898551-131898745	6:131898761-131898958	905	869	0.960221	TE-InDel	DNA/hAT	GRMZM5G847615	39.7586	0.552041	0.724928	B73	indel-	10	5	15	0.207287	ns
b0797	Zm00001d037668	6	133555104	133557311	+	6:133550560-133554860	6:128320826-128320826	B73	244	6:133550431-133550560	6:133554860-133555054	4300	1638	0.38093	TE-InDel	LTR/Gypsy	GRMZM2G131650	35.3012	-1.28779	0.768741	MO17	indel-	3	13	16	0.917257	ns
b0798	Zm00001d037684	6	133964806	133965066	-	6:133965243-133965247	6:128780961-128781113	Mo17	181	6:133965055-133965247	6:133965243-133965446	152	0	0	none-TE-InDel		GRMZM2G441656	20.9217	7.13261	0.577403	B73	indel-	4	5	9	0.458798	ns
b0799	Zm00001d037684	6	133964806	133965066	-	6:133966735-133967876	6:128782598-128782602	B73	1669	6:133966536-133966735	6:133967876-133968074	1141	1140	0.999124	TE-InDel	LTR/Copia	GRMZM2G441656	20.9217	7.13261	0.577403	B73	indel+	7	9	16	0.236524	ns
b0800	Zm00001d037684	6	133964806	133965066	-	6:133968405-133969163	6:128783123-128783128	B73	3339	6:133968206-133968405	6:133969163-133969360	758	365	0.48153	TE-InDel	DNA	GRMZM2G441656	20.9217	7.13261	0.577403	B73	indel+	10	6	16	0.839373	ns
b0801	Zm00001d037713	6	134933417	134935896	-	6:134936347-134936355	6:129736959-129737340	Mo17	459	6:134936147-134936355	6:134936347-134936547	381	351	0.92126	TE-InDel	DNA/hAT	GRMZM2G066341	19.0132	3.47256	0.495655	B73	indel-	0	15	15
b0802	Zm00001d037849	6	139653712	139656071	+	6:139649230-139649237	6:134418498-134418630	Mo17	4475	6:139649033-139649230	6:139649237-139649436	132	0	0	none-TE-InDel		GRMZM2G147245	40.9304	0.531101	0.818086	B73	indel-	10	4	14	0.0161552	significant	indel-	consistent
b0803	Zm00001d037849	6	139653712	139656071	+	6:139650412-139650640	6:134419802-134419807	B73	3072	6:139650256-139650412	6:139650640-139650841	228	227	0.995614	TE-InDel	DNA/MuDR	GRMZM2G147245	40.9304	0.531101	0.818086	B73	indel+	6	10	16	0.0682658	ns
b0804	Zm00001d037849	6	139653712	139656071	+	6:139653006-139653227	6:134422136-134422186	B73	485	6:139652860-139653006	6:139653227-139653374	221	147	0.665158	TE-InDel	DNA	GRMZM2G147245	40.9304	0.531101	0.818086	B73	indel+	6	10	16	0.0759331	ns
b0805	Zm00001d037937	6	142777670	142778191	-	6:142778308-142778308	6:137276292-137276965	Mo17	117	6:142778110-142778308	6:142778308-142778507	673	0	0	none-TE-InDel		GRMZM2G117439	45.288	4.22682	0.813251	B73	indel-	2	13	15	0.290745	ns
b0806	Zm00001d037939	6	142830033	142844642	-	6:142844931-142844931	6:137312549-137313523	Mo17	289	6:142844732-142844931	6:142844931-142845132	974	974	1	TE-InDel	DNA/Helitron	GRMZM2G117357	37.606	-2.60592	0.704737	MO17	indel+	2	6	8	0.327461	ns
b0808	Zm00001d038081	6	147117119	147118645	+	6:147116118-147116119	6:141873359-141874894	Mo17	1000	6:147115920-147116118	6:147116119-147116318	1535	1517	0.988274	TE-InDel	LINE/L1	GRMZM2G450459	23.8968	0.185351	0.589945	B73	indel-	6	9	15	0.080522	ns
b0809	Zm00001d038092	6	147483399	147495234	+	6:147482008-147482362	6:142075507-142075514	B73	1037	6:147481809-147482008	6:147482362-147482564	354	151	0.426554	TE-InDel	DNA/PIF-Harbinger	GRMZM2G135909	53.4795	3.07825	0.761179	B73	indel+	4	12	16	0.435805	ns
b0810	Zm00001d038147	6	149398193	149403023	-	6:149403120-149403123	6:144210308-144210686	Mo17	100	6:149402920-149403123	6:149403120-149403269	378	368	0.973545	TE-InDel	DNA/PIF-Harbinger	GRMZM2G479608	51.809	15.4234	0.859413	B73	indel-	1	14	15
b0811	Zm00001d038150	6	149492907	149511919	-	6:149512472-149512704	6:144336442-144336444	B73	553	6:149512273-149512472	6:149512704-149512904	232	224	0.965517	TE-InDel	DNA/PIF-Harbinger	GRMZM2G359365	25.8778	1.05539	0.534152	B73	indel+	5	11	16	0.733123	ns
b0812	Zm00001d038191	6	151070539	151071477	-	6:151072086-151072134	6:145747284-145747909	Mo17	609	6:151071887-151072086	6:151072134-151072271	625	625	1	TE-InDel	DNA/PIF-Harbinger	GRMZM2G398055	36.2204	1.24898	0.743024	B73	indel-	5	7	12	0.0921696	ns
b0813	Zm00001d038191	6	151070539	151071477	-	6:151072270-151072271	6:145748043-145748340	Mo17	794	6:151072134-151072271	6:151072270-151072469	297	297	1	TE-InDel	DNA/PIF-Harbinger	GRMZM2G398055	36.2204	1.24898	0.743024	B73	indel-	9	6	15	0.836558	ns
b0814	Zm00001d038222	6	151951671	151955702	-	6:151956821-151957436	6:146614215-146614218	B73	1119	6:151956622-151956821	6:151957436-151957638	615	601	0.977236	TE-InDel	DNA/hAT	GRMZM2G018971	52.9693	1.71885	0.863866	B73	indel+	13	3	16	0.900286	ns
b0815	Zm00001d038222	6	151951671	151955702	-	6:151959140-151959381	6:146615878-146615880	B73	3438	6:151958941-151959140	6:151959381-151959580	241	0	0	none-TE-InDel		GRMZM2G018971	52.9693	1.71885	0.863866	B73	indel+	6	10	16	0.448684	ns
b0816	Zm00001d038223	6	151957816	151962410	-	6:151965158-151965351	6:146621710-146621713	B73	2748	6:151964959-151965158	6:151965351-151965551	193	193	1	TE-InDel	DNA	GRMZM2G456512	42.6914	-1.74451	0.710227	MO17	indel-	5	11	16	0.628136	ns
b0817	Zm00001d038224	6	151975768	151979800	+	6:151971585-151971786	6:146653982-146653985	B73	3982	6:151971386-151971585	6:151971786-151971973	201	201	1	TE-InDel	DNA/PIF-Harbinger	GRMZM2G153075	47.8496	-1.521	0.829564	MO17	indel-	9	7	16	0.655437	ns
b0818	Zm00001d038224	6	151975768	151979800	+	6:151972293-151975138	6:146654543-146654566	B73	630	6:151972094-151972293	6:151975138-151975324	2845	2801	0.984534	TE-InDel	DNA/hAT	GRMZM2G153075	47.8496	-1.521	0.829564	MO17	indel-	7	9	16	0.772688	ns
b0819	Zm00001d038248	6	152313041	152316646	-	6:152317035-152317039	6:146927285-146927915	Mo17	393	6:152316851-152317039	6:152317035-152317235	630	629	0.998413	TE-InDel	LTR/Gypsy	GRMZM2G175676	24.917	2.73549	0.527845	B73	indel-	1	15	16
b0820	Zm00001d038248	6	152313041	152316646	-	6:152317781-152317792	6:146928688-146928894	Mo17	1135	6:152317588-152317781	6:152317792-152317990	206	108	0.524272	TE-InDel	DNA/PIF-Harbinger	GRMZM2G175676	24.917	2.73549	0.527845	B73	indel-	0	11	11
b0821	Zm00001d038248	6	152313041	152316646	-	6:152318378-152318578	6:146929492-146929493	B73	1732	6:152318183-152318378	6:152318578-152318779	200	0	0	none-TE-InDel		GRMZM2G175676	24.917	2.73549	0.527845	B73	indel+	14	2	16	0.447633	ns
b0822	Zm00001d038342	6	154871823	154875711	+	6:154868921-154869796	6:149458462-149458463	B73	2027	6:154868722-154868921	6:154869796-154869998	875	0	0	none-TE-InDel		GRMZM2G066225	41.9429	3.87464	0.808963	B73	indel+	10	6	16	0.124495	ns
b0823	Zm00001d038365	6	155606052	155610646	-	6:155610932-155610940	6:149996692-149997089	Mo17	286	6:155610806-155610932	6:155610940-155611137	397	396	0.997481	TE-InDel	DNA/PIF-Harbinger	GRMZM2G059314	57.4468	4.65851	0.893574	B73	indel-	3	10	13	0.717139	ns
b0824	Zm00001d038378	6	155920028	155922496	-	6:155923815-155923816	6:150310859-150311058	Mo17	1319	6:155923616-155923815	6:155923816-155924011	199	0	0	none-TE-InDel		GRMZM2G431350	35.2268	-3.69661	0.753796	MO17	indel+	1	13	14
b0825	Zm00001d038538	6	159592404	159594335	-	6:159596854-159597135	6:154505505-154505647	B73	2519	6:159596655-159596854	6:159597135-159597334	281	166	0.590747	TE-InDel	DNA/Helitron	GRMZM2G117344	33.6312	0.614714	0.643302	B73	indel+	6	8	14	0.282087	ns
b0828	Zm00001d038555	6	159789930	159794329	+	6:159787031-159787051	6:154803969-154804122	Mo17	2879	6:159786832-159787031	6:159787051-159787250	153	67	0.437908	TE-InDel	Simple_repeat	GRMZM2G140817	29.6469	-3.37197	0.624191	MO17	indel+	1	13	14
b0829	Zm00001d038555	6	159789930	159794329	+	6:159788669-159788672	6:154805836-154806977	Mo17	1258	6:159788470-159788669	6:159788672-159788869	1141	510	0.446976	TE-InDel	DNA/hAT	GRMZM2G140817	29.6469	-3.37197	0.624191	MO17	indel+	3	13	16	0.361893	ns
b0830	Zm00001d038605	6	160888107	160889679	-	6:160890646-160891389	6:155777538-155777543	B73	967	6:160890442-160890646	6:160891389-160891588	743	741	0.997308	TE-InDel	LTR/Gypsy	GRMZM2G082037	19.4977	-0.179544	0.517182	MO17	indel-	6	10	16	0.848933	ns
b0831	Zm00001d038605	6	160888107	160889679	-	6:160891615-160891648	6:155777762-155780073	Mo17	1936	6:160891418-160891615	6:160891648-160891850	2311	2311	1	TE-InDel	LINE/L1	GRMZM2G082037	19.4977	-0.179544	0.517182	MO17	indel+	3	9	12	0.623625	ns
b0832	Zm00001d038605	6	160888107	160889679	-	6:160893486-160893493	6:155781907-155782340	Mo17	3814	6:160893294-160893493	6:160893486-160893686	433	415	0.95843	TE-InDel	LINE/L1	GRMZM2G082037	19.4977	-0.179544	0.517182	MO17	indel+	6	6	12	0.869989	ns
b0833	Zm00001d038605	6	160888107	160889679	-	6:160893704-160893840	6:155782555-155782559	B73	4025	6:160893507-160893704	6:160893840-160894042	136	136	1	TE-InDel	LTR/Copia	GRMZM2G082037	19.4977	-0.179544	0.517182	MO17	indel-	6	10	16	0.848933	ns
b0834	Zm00001d038699	6	162814646	162816895	-	6:162819488-162819868	6:157957885-157957887	B73	2593	6:162819291-162819488	6:162819868-162819976	380	360	0.947368	TE-InDel	DNA/PIF-Harbinger	GRMZM2G140996	53.5878	26.9518	0.89705	B73	indel+	9	7	16	0.667273	ns
b0835	Zm00001d038733	6	163540535	163542535	+	6:163539933-163540281	6:158775413-158775419	B73	254	6:163539738-163539933	6:163540281-163540485	348	348	1	TE-InDel	DNA/EnSpm/CACTA	AC218148.2_FG008	25.1111	2.83952	0.568309	B73	indel+	5	11	16	0.0363732	significant	indel-	inconsistent
b0837	Zm00001d038741	6	163651425	163652698	-	6:163654055-163654194	6:158914497-158914513	B73	1357	6:163653856-163654055	6:163654194-163654393	139	122	0.877698	TE-InDel	DNA/PIF-Harbinger	GRMZM2G040517	38.2957	2.24206	0.678104	B73	indel+	6	10	16	0.273017	ns
b0838	Zm00001d038765	6	164061073	164062509	-	6:164062879-164062881	6:159452577-159452937	Mo17	372	6:164062679-164062881	6:164062879-164063079	360	177	0.491667	TE-InDel	DNA/PIF-Harbinger	GRMZM2G058314	31.4505	-0.702704	0.676442	MO17	indel+	2	9	11	0.318587	ns
b0839	Zm00001d038769	6	164167046	164171996	-	6:164172180-164176145	6:159537270-159537271	B73	184	6:164171981-164172180	6:164176145-164176345	3965	1789	0.451198	TE-InDel	DNA/Helitron	GRMZM2G004592	23.6432	0.40871	0.499511	B73	indel+	2	14	16	0.619043	ns
b0840	Zm00001d038784	6	164332917	164336272	+	6:164331911-164332781	6:159684841-159684854	B73	136	6:164331729-164331911	6:164332781-164332961	870	837	0.962069	TE-InDel	DNA/hAT	GRMZM2G074427	31.7627	0.372702	0.562434	B73	indel+	1	15	16
b0841	Zm00001d038861	6	166018995	166021892	+	6:166016241-166016938	6:161196894-161196901	B73	2057	6:166016042-166016241	6:166016938-166017149	697	696	0.998565	TE-InDel	DNA/hAT	GRMZM5G892879	19.2913	1.27106	0.497714	B73	indel+	4	12	16	0.678532	ns
b0842	Zm00001d038861	6	166018995	166021892	+	6:166017409-166017415	6:161197432-161197613	Mo17	1586	6:166017293-166017415	6:166017409-166017605	181	181	1	TE-InDel	Simple_repeat	GRMZM5G892879	19.2913	1.27106	0.497714	B73	indel-	5	8	13	0.1931	ns
b0843	Zm00001d038862	6	166027177	166029976	+	6:166022341-166026373	6:161202268-161202287	B73	804	6:166022148-166022341	6:166026373-166026574	4032	3102	0.769345	TE-InDel	DNA/hAT	GRMZM2G021406	53.5651	8.06029	0.803452	B73	indel+	2	14	16	0.658448	ns
b0844	Zm00001d038911	6	166851524	166851829	+	6:166847792-166848004	6:161965575-161965596	B73	3520	6:166847593-166847792	6:166848004-166848203	212	118	0.556604	TE-InDel	DNA/PIF-Harbinger	GRMZM2G004909	35.6217	-6.17025	0.759964	MO17	indel-	11	5	16	0.616405	ns
b0845	Zm00001d038913	6	166868333	166868629	+	6:166867644-166867646	6:161971167-161971441	Mo17	689	6:166867528-166867646	6:166867644-166867838	274	119	0.434307	TE-InDel	Simple_repeat	GRMZM2G320373	38.1597	2.1672	0.670365	B73	indel-	5	5	10	0.749077	ns
b0846	Zm00001d038916	6	166888284	166895783	+	6:166886576-166886580	6:162038564-162038689	Mo17	1708	6:166886381-166886580	6:166886576-166886783	125	125	1	TE-InDel	DNA	GRMZM2G320399	17.4029	1.18732	0.527684	B73	indel-	3	6	9	0.420868	ns
b0847	Zm00001d038948	6	167441439	167452966	+	6:167439824-167439825	6:162593778-162593959	Mo17	1614	6:167439625-167439824	6:167439825-167440025	181	150	0.828729	TE-InDel	NonLTR/L1	GRMZM2G375064	52.5294	0.471168	0.809173	B73	indel-	13	3	16	0.252452	ns
b0849	Zm00001d039076	6	169623657	169625207	-	6:169630090-169630092	6:164720886-164721244	Mo17	4885	6:169629895-169630092	6:169630090-169630281	358	358	1	TE-InDel	LTR/Gypsy	GRMZM5G846343	54.2927	2.44465	0.892563	B73	indel-	7	8	15	0.512927	ns
b0850	Zm00001d039108	6	170139690	170140607	-	6:170143574-170143804	6:165074887-165074891	B73	2967	6:170143375-170143574	6:170143804-170143998	230	224	0.973913	TE-InDel	DNA/PIF-Harbinger	GRMZM5G893630	43.0425	5.82145	0.828768	B73	indel+	4	12	16	0.807435	ns
b0851	Zm00001d039108	6	170139690	170140607	-	6:170144300-170144416	6:165075362-165075374	B73	3693	6:170144101-170144300	6:170144416-170144616	116	116	1	TE-InDel	DNA	GRMZM5G893630	43.0425	5.82145	0.828768	B73	indel+	5	11	16	0.972342	ns
b0852	Zm00001d039147	6	171041056	171048997	+	6:171039827-171039828	6:166103244-166103495	Mo17	1228	6:171039628-171039827	6:171039828-171040028	251	0	0	none-TE-InDel		GRMZM2G158998	51.9616	1.94827	0.753985	B73	indel-	2	8	10	0.501034	ns
b0853	Zm00001d039147	6	171041056	171048997	+	6:171040287-171040859	6:166103942-166103952	B73	197	6:171040088-171040287	6:171040859-171041059	572	440	0.769231	TE-InDel	DNA/hAT	GRMZM2G158998	51.9616	1.94827	0.753985	B73	indel+	10	6	16	0.407594	ns
b0854	Zm00001d039167	6	171659500	171663327	+	6:171658965-171658973	6:166688512-166689226	Mo17	535	6:171658774-171658973	6:171658965-171659163	714	378	0.529412	TE-InDel	DNA/hAT	GRMZM2G099529	36.8676	-1.41993	0.726891	MO17	indel+	6	9	15	0.338154	ns
b0855	Zm00001d039196	6	172328092	172333861	-	6:172334804-172335014	6:167396810-167396818	B73	943	6:172334610-172334804	6:172335014-172335196	210	198	0.942857	TE-InDel	DNA/MuDR	GRMZM2G077490	19.6914	0.847437	0.564528	B73	indel+	7	9	16	0.936815	ns
b0856	Zm00001d039196	6	172328092	172333861	-	6:172336431-172338167	6:167398208-167398218	B73	2570	6:172336232-172336431	6:172338167-172338366	1736	1721	0.991359	TE-InDel	DNA/MuDR	GRMZM2G077490	19.6914	0.847437	0.564528	B73	indel+	5	11	16	0.872788	ns
b0858	Zm00001d018725	7	3139241	3139651	-	7:3141466-3141468	7:2891045-2891172	Mo17	1817	7:3141269-3141468	7:3141466-3141666	127	126	0.992126	TE-InDel	DNA	GRMZM2G044174	46.5957	1.66741	0.679833	B73	indel-	1	12	13
b0859	Zm00001d018775	7	4929975	4930745	-	7:4931762-4932281	7:4517893-4517898	B73	1017	7:4931563-4931762	7:4932281-4932480	519	500	0.963391	TE-InDel	DNA/EnSpm/CACTA	GRMZM2G142721	22.9376	0.970785	0.638413	B73	indel+	6	10	16	0.113379	ns
b0860	Zm00001d018787	7	5210807	5216700	-	7:5217603-5217606	7:4792389-4792746	Mo17	906	7:5217403-5217606	7:5217603-5217765	357	357	1	TE-InDel	LTR/Gypsy	GRMZM2G080512	36.5971	0.538281	0.728515	B73	indel-	2	10	12	0.00360563	significant	indel+	inconsistent
b0861	Zm00001d018787	7	5210807	5216700	-	7:5217765-5217945	7:4792910-4792927	B73	1065	7:5217603-5217765	7:5217945-5218144	180	103	0.572222	TE-InDel	DNA/MuDR	GRMZM2G080512	36.5971	0.538281	0.728515	B73	indel+	7	9	16	0.125894	ns
b0862	Zm00001d018789	7	5224217	5226970	-	7:5229268-5229964	7:4803909-4803918	B73	2298	7:5229090-5229268	7:5229964-5230101	696	540	0.775862	TE-InDel	DNA/hAT	GRMZM2G039922	32.5291	1.94022	0.681654	B73	indel+	5	11	16	0.9747	ns
b0863	Zm00001d018792	7	5330584	5347005	-	7:5347367-5350922	7:4923178-4923182	B73	362	7:5347168-5347367	7:5350922-5351121	3555	3547	0.99775	TE-InDel	LINE/L1	GRMZM2G011800	24.7863	0.377246	0.553866	B73	indel+	3	13	16	0.665165	ns
b0864	Zm00001d018827	7	6587108	6587917	+	7:6585378-6585381	7:6307424-6307738	Mo17	1730	7:6585182-6585381	7:6585378-6585573	314	314	1	TE-InDel	DNA/PIF-Harbinger	GRMZM2G395535	39.2245	-1.18058	0.715366	MO17	indel+	2	9	11	0.498281	ns
b0865	Zm00001d018867	7	7839802	7844665	-	7:7844755-7844778	7:7538672-7538954	Mo17	90	7:7844566-7844755	7:7844778-7844976	282	282	1	TE-InDel	DNA	GRMZM2G044527	43.3081	-2.94479	0.758912	MO17	indel+	4	8	12	0.126906	ns
b0868	Zm00001d018936	7	9658900	9661440	-	7:9661586-9661720	7:9364384-9364396	B73	146	7:9661387-9661586	7:9661720-9661919	134	0	0	none-TE-InDel		GRMZM2G456086	20.8023	1.44856	0.513547	B73	indel+	7	9	16	0.417025	ns
b0869	Zm00001d018936	7	9658900	9661440	-	7:9661907-9661922	7:9364590-9365154	Mo17	482	7:9661720-9661922	7:9661907-9662107	564	0	0	none-TE-InDel		GRMZM2G456086	20.8023	1.44856	0.513547	B73	indel-	4	7	11	0.816572	ns
b0870	Zm00001d018954	7	10457752	10458921	+	7:10457240-10457244	7:10566767-10566959	Mo17	512	7:10457048-10457244	7:10457240-10457440	192	187	0.973958	TE-InDel	DNA	GRMZM2G161097	23.8443	1.5982	0.551094	B73	indel-	3	8	11
b0871	Zm00001d018954	7	10457752	10458921	+	7:10457459-10457470	7:10567188-10568030	Mo17	293	7:10457271-10457470	7:10457459-10457669	842	144	0.171021	TE-InDel	DNA/EnSpm/CACTA	GRMZM2G161097	23.8443	1.5982	0.551094	B73	indel-	8	6	14	0.967637	ns
b0872	Zm00001d019048	7	14103892	14109913	+	7:14101624-14101909	7:14790556-14790560	B73	1983	7:14101442-14101624	7:14101909-14102106	285	214	0.750877	TE-InDel	NonLTR/L1	GRMZM2G158489	56.903	2.90562	0.818251	B73	indel+	3	13	16	0.950283	ns
b0873	Zm00001d019218	7	22313088	22317208	-	7:22321659-22321784	7:22751744-22751748	B73	4451	7:22321460-22321659	7:22321784-22321979	125	125	1	TE-InDel	DNA	GRMZM2G063258	33.3182	0.437995	0.682345	B73	indel+	13	3	16	0.000980693	significant	indel-	inconsistent
b0874	Zm00001d019218	7	22313088	22317208	-	7:22322109-22322115	7:22752081-22752216	Mo17	4907	7:22321891-22322115	7:22322109-22322308	135	135	1	TE-InDel	LTR/Copia	GRMZM2G063258	33.3182	0.437995	0.682345	B73	indel-	2	14	16	0.737258	ns
b0875	Zm00001d019234	7	23322287	23327390	-	7:23327457-23327459	7:23553069-23553912	Mo17	69	7:23327257-23327459	7:23327457-23327653	843	570	0.676157	TE-InDel	DNA/PIF-Harbinger	GRMZM2G140352	26.4486	-1.50369	0.644817	MO17	indel+	3	10	13	0.0991932	ns
b0877	Zm00001d019320	7	27706373	27708200	+	7:27705929-27705969	7:27265606-27266014	Mo17	404	7:27705733-27705929	7:27705969-27706166	408	266	0.651961	TE-InDel	DNA/Helitron	GRMZM5G898371	41.5428	-1.04969	0.790519	MO17	indel+	3	11	14	0.852921	ns
b0878	Zm00001d019957	7	80232185	80242102	-	7:80242393-80242395	7:77577755-77577887	Mo17	293	7:80242194-80242395	7:80242393-80242593	132	121	0.916667	TE-InDel	DNA/PIF-Harbinger	GRMZM2G091643	24.9123	1.93417	0.538794	B73	indel-	7	7	14	0.399383	ns
b0879	Zm00001d020019	7	86094098	86099698	+	7:86093802-86093810	7:83051571-83055148	Mo17	296	7:86093611-86093810	7:86093802-86094002	3577	3557	0.994409	TE-InDel	DNA/hAT	GRMZM2G064197	36.5021	1.7947	0.646685	B73	indel-	10	5	15	0.546947	ns
b0880	Zm00001d020234	7	101492829	101504550	-	7:101504622-101504623	7:97988094-97991388	Mo17	73	7:101504424-101504623	7:101504622-101504819	3294	1753	0.53218	TE-InDel	LINE/L1	GRMZM2G004475	30.2163	1.63421	0.669486	B73	indel-	5	11	16	0.00571223	significant	indel-	consistent
b0881	Zm00001d020236	7	101645190	101646950	-	7:101648265-101648868	7:98114116-98114123	B73	1315	7:101648082-101648265	7:101648868-101649068	603	595	0.986733	TE-InDel	DNA/hAT	GRMZM2G082019	43.255	1.8704	0.736253	B73	indel+	7	9	16	0.0689419	ns
b0882	Zm00001d020348	7	108322505	108323760	+	7:108321176-108321507	7:104742240-104742242	B73	998	7:108320975-108321176	7:108321507-108321706	331	326	0.984894	TE-InDel	DNA/PIF-Harbinger	GRMZM2G055809	24.5487	0.801862	0.536235	B73	indel+	8	8	16	0.950001	ns
b0883	Zm00001d020348	7	108322505	108323760	+	7:108321961-108321964	7:104742689-104742826	Mo17	544	7:108321761-108321964	7:108321961-108322150	137	137	1	TE-InDel	LTR/Gypsy	GRMZM2G055809	24.5487	0.801862	0.536235	B73	indel-	1	6	7
b0884	Zm00001d020434	7	114139355	114140955	-	7:114142397-114142716	7:110955434-110955438	B73	1442	7:114142198-114142397	7:114142716-114142911	319	319	1	TE-InDel	DNA/PIF-Harbinger	GRMZM5G851051	39.7876	-0.633115	0.736631	MO17	indel-	12	4	16	0.0783664	ns
b0886	Zm00001d020516	7	119982387	119992486	-	7:119992570-119992582	7:116361919-116362303	Mo17	84	7:119992371-119992570	7:119992582-119992768	384	333	0.867188	TE-InDel	DNA/PIF-Harbinger	GRMZM2G029223	24.9475	0.644376	0.596905	B73	indel-	4	10	14	0.699257	ns
b0887	Zm00001d020551	7	122012596	122013123	+	7:122011782-122012125	7:118142925-118142925	B73	471	7:122011583-122011782	7:122012125-122012324	343	0	0	none-TE-InDel		GRMZM2G041163	32.2859	-0.934465	0.624918	MO17	indel-	9	7	16	0.149955	ns
b0888	Zm00001d020560	7	122291284	122296621	-	7:122297112-122297116	7:118435351-118435724	Mo17	495	7:122296927-122297116	7:122297112-122297291	373	305	0.817694	TE-InDel	DNA/PIF-Harbinger	GRMZM2G173759	22.4945	3.52619	0.529912	B73	indel-	1	4	5
b0890	Zm00001d020726	7	130295212	130300354	-	7:130301027-130301043	7:126572734-126572953	Mo17	673	7:130300828-130301027	7:130301043-130301239	219	199	0.908676	TE-InDel	DNA	GRMZM2G135444	29.3173	-0.569897	0.76181	MO17	indel+	1	10	11
b0891	Zm00001d020807	7	133502732	133510166	+	7:133501693-133501817	7:129594456-129594460	B73	915	7:133501494-133501693	7:133501817-133501979	124	109	0.879032	TE-InDel	DNA/PIF-Harbinger	GRMZM2G115304	32.6797	-2.24919	0.687917	MO17	indel-	9	6	15	0.804609	ns
b0892	Zm00001d020858	7	134901536	134904779	+	7:134897906-134898099	7:131305845-131305848	B73	3437	7:134897707-134897906	7:134898099-134898299	193	179	0.927461	TE-InDel	DNA/PIF-Harbinger	GRMZM2G464985	21.9705	1.8629	0.521948	B73	indel+	9	7	16	0.786655	ns
b0893	Zm00001d020858	7	134901536	134904779	+	7:134900339-134900342	7:131309022-131309151	Mo17	1197	7:134900151-134900342	7:134900339-134900501	129	127	0.984496	TE-InDel	DNA	GRMZM2G464985	21.9705	1.8629	0.521948	B73	indel-	2	13	15	0.862891	ns
b0894	Zm00001d020881	7	135317302	135321287	-	7:135323789-135323918	7:131906613-131906615	B73	2502	7:135323590-135323789	7:135323918-135324059	129	129	1	TE-InDel	DNA/PIF-Harbinger	GRMZM2G151407	23.4048	-0.901221	0.505515	MO17	indel-	10	6	16	0.537544	ns
b0895	Zm00001d020900	7	135891863	135894153	-	7:135894236-135894392	7:132437375-132437383	B73	83	7:135894037-135894236	7:135894392-135894592	156	0	0	none-TE-InDel		GRMZM5G802566	20.0703	-0.633577	0.585495	MO17	indel-	3	13	16	0.026405	significant	indel-	consistent
b0896	Zm00001d020965	7	138116641	138122918	+	7:138116264-138116374	7:134338764-134338764	B73	267	7:138116065-138116264	7:138116374-138116586	110	98	0.890909	TE-InDel	Simple_repeat	GRMZM2G101711	40.2112	4.75928	0.79094	B73	indel+	7	9	16	0.183734	ns
b0897	Zm00001d020971	7	138210336	138221164	-	7:138221326-138221330	7:134420608-134420921	Mo17	166	7:138221198-138221330	7:138221326-138221526	313	313	1	TE-InDel	DNA/PIF-Harbinger	GRMZM2G004583	30.0353	-1.19762	0.509618	MO17	indel+	1	11	12
b0898	Zm00001d020975	7	138262824	138266459	-	7:138268452-138268901	7:134555386-134555395	B73	1993	7:138268254-138268452	7:138268901-138269101	449	268	0.596882	TE-InDel	DNA/MuDR	GRMZM2G168269	38.265	3.40582	0.686644	B73	indel+	13	3	16	0.981076	ns
b0899	Zm00001d021056	7	141662438	141666340	+	7:141660915-141661039	7:137412556-137412562	B73	1399	7:141660710-141660915	7:141661039-141661238	124	112	0.903226	TE-InDel	LTR/Copia	GRMZM5G806833	35.5771	-2.28363	0.694079	MO17	indel-	5	11	16	0.608042	ns
b0902	Zm00001d021064	7	141949476	141951690	-	7:141953123-141953404	7:137661234-137661236	B73	1433	7:141952924-141953123	7:141953404-141953604	281	280	0.996441	TE-InDel	DNA/PIF-Harbinger	GRMZM5G872141	23.5177	0.267093	0.551151	B73	indel+	4	12	16	0.357669	ns
b0903	Zm00001d021242	7	146763235	146765187	-	7:146765517-146765635	7:142542379-142542390	B73	330	7:146765325-146765517	7:146765635-146765836	118	43	0.364407	TE-InDel	DNA	GRMZM2G052893	38.677	-0.508149	0.713728	MO17	indel-	5	11	16	0.280025	ns
b0905	Zm00001d021287	7	147960306	147965257	-	7:147965399-147970003	7:143790219-143790224	B73	142	7:147965200-147965399	7:147970003-147970199	4604	4604	1	TE-InDel	DNA/PIF-Harbinger	GRMZM2G386971	45.1393	3.03471	0.737441	B73	indel+	9	7	16	0.402126	ns
b0906	Zm00001d021313	7	148569648	148572118	-	7:148572316-148572323	7:144324797-144325107	Mo17	198	7:148572121-148572316	7:148572323-148572522	310	0	0	none-TE-InDel		GRMZM2G135782	44.8426	2.40743	0.72049	B73	indel-	2	11	13	0.222154	ns
b0907	Zm00001d021335	7	149129974	149134091	-	7:149134316-149134321	7:144956647-144956976	Mo17	225	7:149134118-149134316	7:149134321-149134518	329	147	0.446809	TE-InDel	DNA	GRMZM2G098764	45.1532	2.27438	0.76106	B73	indel-	7	6	13	0.133989	ns
b0908	Zm00001d021346	7	149528661	149531321	-	7:149531372-149531745	7:145316565-145316571	B73	51	7:149531173-149531372	7:149531745-149531936	373	373	1	TE-InDel	DNA/PIF-Harbinger	GRMZM2G092131	49.3954	1.84387	0.771803	B73	indel+	11	5	16	0.00112672	significant	indel+	consistent
b0910	Zm00001d021356	7	149757277	149757543	+	7:149756938-149756957	7:145707935-145708419	Mo17	320	7:149756739-149756938	7:149756957-149757155	484	437	0.902893	TE-InDel	DNA/PIF-Harbinger	GRMZM2G357040	42.4162	-0.547792	0.751951	MO17	indel+	2	14	16	0.0091024	significant	indel+	consistent
b0911	Zm00001d021396	7	150910524	150917934	+	7:150910324-150910363	7:146889100-146889343	Mo17	161	7:150910141-150910324	7:150910363-150910562	243	153	0.62963	TE-InDel	DNA/hAT	GRMZM2G146240	23.8441	2.35819	0.553091	B73	indel-	1	15	16
b0914	Zm00001d021453	7	152605084	152608082	+	7:152604510-152604907	7:148491538-148491542	B73	177	7:152604311-152604510	7:152604907-152605106	397	249	0.627204	TE-InDel	DNA/PIF-Harbinger	GRMZM2G012413	48.2783	7.07333	0.795657	B73	indel+	6	10	16	0.430786	ns
b0915	Zm00001d021487	7	153736670	153739072	+	7:153732783-153735909	7:149489857-149489861	B73	761	7:153732647-153732783	7:153735909-153736109	3126	2708	0.866283	TE-InDel	LTR/Gypsy	GRMZM2G413030	51.3612	-0.456249	0.852861	MO17	indel-	9	7	16	0.503049	ns
b0920	Zm00001d021627	7	158520260	158520826	-	7:158523801-158524349	7:155112215-155112224	B73	2975	7:158523602-158523801	7:158524349-158524550	548	367	0.669708	TE-InDel	DNA/hAT	GRMZM2G449709	25.2687	-0.307108	0.581705	MO17	indel-	5	11	16	0.465648	ns
b0921	Zm00001d021627	7	158520260	158520826	-	7:158524997-158525098	7:155112936-155113228	Mo17	4171	7:158524798-158524997	7:158525098-158525297	292	147	0.503425	TE-InDel	DNA	GRMZM2G449709	25.2687	-0.307108	0.581705	MO17	indel+	8	7	15	0.298143	ns
b0922	Zm00001d021731	7	161606806	161611416	-	7:161612312-161612314	7:158124200-158124379	Mo17	898	7:161612120-161612314	7:161612312-161612421	179	148	0.826816	TE-InDel	DNA/Helitron	GRMZM2G113432	24.6928	0.411248	0.510474	B73	indel-	1	6	7
b0924	Zm00001d021731	7	161606806	161611416	-	7:161614267-161614272	7:158125167-158125655	Mo17	2856	7:161614093-161614272	7:161614267-161614465	488	488	1	TE-InDel	DNA/PIF-Harbinger	GRMZM2G113432	24.6928	0.411248	0.510474	B73	indel-	2	9	11	0.384984	ns
b0925	Zm00001d021731	7	161606806	161611416	-	7:161615276-161615276	7:158126724-158128251	Mo17	3860	7:161615082-161615276	7:161615276-161615404	1527	1156	0.75704	TE-InDel	DNA/MuDR	GRMZM2G113432	24.6928	0.411248	0.510474	B73	indel-	7	8	15	0.205005	ns
b0926	Zm00001d021778	7	162876923	162877570	-	7:162879882-162879889	7:159361029-159361592	Mo17	2312	7:162879683-162879882	7:162879889-162880069	563	93	0.165187	TE-InDel	DNA	GRMZM5G832281	25.3894	0.702573	0.569948	B73	indel-	1	9	10
b0927	Zm00001d021787	7	162992393	162997476	+	7:162992136-162992213	7:159511668-159512371	Mo17	180	7:162991937-162992136	7:162992213-162992405	703	450	0.640114	TE-InDel	DNA/PIF-Harbinger	GRMZM2G057475	31.6179	-1.08849	0.648518	MO17	indel+	2	11	13	0.426578	ns
b0928	Zm00001d021826	7	163785585	163786943	+	7:163785089-163785093	7:160267038-160267464	Mo17	492	7:163784973-163785089	7:163785093-163785292	426	382	0.896714	TE-InDel	DNA/hAT	GRMZM2G106548	23.4468	-1.50769	0.548907	MO17	indel+	5	8	13	0.943775	ns
b0929	Zm00001d021883	7	165344079	165346378	-	7:165346703-165346705	7:161881750-161881976	Mo17	327	7:165346508-165346705	7:165346703-165346832	226	223	0.986726	TE-InDel	DNA/MuDR	GRMZM2G006505	51.1266	-2.22139	0.813136	MO17	indel+	8	2	10	0.916483	ns
b0930	Zm00001d021883	7	165344079	165346378	-	7:165346832-165346909	7:161882105-161883097	Mo17	454	7:165346703-165346832	7:165346909-165347024	992	508	0.512097	TE-InDel	LTR/Copia	GRMZM2G006505	51.1266	-2.22139	0.813136	MO17	indel+	9	2	11	0.830846	ns
b0931	Zm00001d021971	7	167276421	167277730	-	7:167278453-167278775	7:163732399-163732402	B73	723	7:167278251-167278453	7:167278775-167278970	322	322	1	TE-InDel	DNA/PIF-Harbinger	GRMZM2G179777	28.119	0.908857	0.553253	B73	indel+	7	9	16	0.859103	ns
b0935	Zm00001d022044	7	168544322	168548259	-	7:168550020-168550026	7:164777532-164778063	Mo17	1767	7:168549820-168550026	7:168550020-168550219	531	530	0.998117	TE-InDel	DNA/hAT	GRMZM2G356076	50.326	-0.359867	0.847403	MO17	indel+	4	10	14	0.24258	ns
b0936	Zm00001d022112	7	170583693	170584463	+	7:170580813-170580921	7:166855316-166855319	B73	2772	7:170580614-170580813	7:170580921-170581121	108	62	0.574074	TE-InDel	DNA	GRMZM2G393671	77.0311	14.3797	0.954967	B73	indel+	4	12	16	0.508725	ns
b0937	Zm00001d022126	7	170886332	170890114	+	7:170883871-170883872	7:167235866-167235997	Mo17	2461	7:170883673-170883872	7:170883871-170884071	131	130	0.992366	TE-InDel	DNA/PIF-Harbinger	GRMZM2G127031	55.6483	-0.423494	0.823329	MO17	indel+	4	7	11	0.909775	ns
b0938	Zm00001d022177	7	171777143	171777733	-	7:171778012-171779281	7:168205110-168205114	B73	279	7:171777813-171778012	7:171779281-171779482	1269	1269	1	TE-InDel	DNA/Helitron	GRMZM2G097593	26.773	-2.75321	0.632692	MO17	indel-	5	11	16	0.642078	ns
b0939	Zm00001d022182	7	172163386	172170413	-	7:172171953-172172146	7:168423603-168423606	B73	1540	7:172171754-172171953	7:172172146-172172349	193	0	0	none-TE-InDel		GRMZM2G017080	44.741	-0.736696	0.829497	MO17	indel-	4	12	16	0.943078	ns
b0940	Zm00001d022275	7	174207485	174211005	+	7:174205048-174205050	7:170432690-170433051	Mo17	2437	7:174204853-174205050	7:174205048-174205246	361	354	0.980609	TE-InDel	LTR/Gypsy	GRMZM2G000718	49.1071	7.83748	0.838348	B73	indel-	4	6	10	0.0500717	ns
b0941	Zm00001d022330	7	175560514	175565324	-	7:175565526-175565538	7:171562410-171562678	Mo17	214	7:175565338-175565538	7:175565526-175565726	268	79	0.294776	TE-InDel	DNA	GRMZM2G003172	42.7933	3.28586	0.795497	B73	indel-	1	10	11
b0942	Zm00001d022342	7	175846507	175850538	-	7:175853261-175853262	7:171860272-171860379	Mo17	2724	7:175853061-175853262	7:175853261-175853461	107	0	0	none-TE-InDel		GRMZM2G000451	39.476	0.69953	0.728106	B73	indel-	8	2	10	0.326396	ns
b0943	Zm00001d022342	7	175846507	175850538	-	7:175853649-175854381	7:171860763-171860861	B73	3111	7:175853453-175853649	7:175854381-175854555	732	699	0.954918	TE-InDel	DNA	GRMZM2G000451	39.476	0.69953	0.728106	B73	indel+	3	13	16	0.647268	ns
b0944	Zm00001d022347	7	175951628	175974505	-	7:175974862-175975083	7:171943755-171943760	B73	357	7:175974663-175974862	7:175975083-175975233	221	216	0.977376	TE-InDel	DNA/MuDR	GRMZM2G161544	22.9202	-0.600588	0.511216	MO17	indel-	8	8	16	0.701237	ns
b0945	Zm00001d022355	7	176071838	176074431	-	7:176075670-176075672	7:172037019-172037199	Mo17	1241	7:176075572-176075672	7:176075670-176075870	180	174	0.966667	TE-InDel	DNA/PIF-Harbinger	GRMZM2G020450	72.957	3.41443	0.762073	B73	indel-	3	9	12	0.0754406	ns
b0946	Zm00001d022537	7	179678287	179681754	+	7:179677563-179677564	7:175615083-175616030	Mo17	724	7:179677366-179677564	7:179677563-179677763	947	763	0.805702	TE-InDel	LTR/Copia	GRMZM2G327042	23.8969	0.343432	0.497997	B73	indel-	4	9	13	0.154985	ns
b0947	Zm00001d022562	7	180070690	180073867	-	7:180074513-180074515	7:176049986-176050364	Mo17	648	7:180074316-180074515	7:180074513-180074709	378	378	1	TE-InDel	DNA/PIF-Harbinger	GRMZM2G113039	20.9659	-0.514623	0.541161	MO17	indel+	1	11	12
b0948	Zm00001d008221	8	1656468	1659625	+	8:1654992-1656264	8:1746819-1746833	B73	204	8:1654794-1654992	8:1656264-1656463	1272	1212	0.95283	TE-InDel	Simple_repeat	GRMZM2G005619	43.1178	4.08529	0.825083	B73	indel+	9	7	16	0.015696	significant	indel+	consistent
b0949	Zm00001d008226	8	1889016	1893402	-	8:1893536-1893543	8:1881225-1882000	Mo17	141	8:1893344-1893543	8:1893536-1893736	775	762	0.983226	TE-InDel	DNA/hAT	GRMZM2G092793	29.5245	0.567418	0.541891	B73	indel-	2	13	15	0.515945	ns
b0950	Zm00001d008248	8	2562419	2568575	+	8:2562246-2562247	8:2517766-2517950	Mo17	173	8:2562051-2562247	8:2562246-2562440	184	0	0	none-TE-InDel		GRMZM2G464491	22.9033	-0.181331	0.570979	MO17	indel+	5	0	5
b0951	Zm00001d008266	8	3527558	3529941	-	8:3531765-3531766	8:3373648-3373782	Mo17	1824	8:3531566-3531765	8:3531766-3531966	134	128	0.955224	TE-InDel	DNA/PIF-Harbinger	GRMZM2G136158	42.5069	6.36943	0.749416	B73	indel-	5	7	12	0.776948	ns
b0952	Zm00001d008266	8	3527558	3529941	-	8:3532406-3532406	8:3374423-3374613	Mo17	2465	8:3532208-3532406	8:3532406-3532542	190	55	0.289474	TE-InDel	Simple_repeat	GRMZM2G136158	42.5069	6.36943	0.749416	B73	indel-	6	6	12	0.625597	ns
b0953	Zm00001d008287	8	4114922	4117752	+	8:4112373-4112375	8:3831498-3831724	Mo17	2549	8:4112177-4112375	8:4112373-4112573	226	0	0	none-TE-InDel		GRMZM2G050325	43.8356	6.70443	0.729449	B73	indel-	7	7	14	0.106613	ns
b0954	Zm00001d008333	8	5562984	5567351	+	8:5561111-5561121	8:5581287-5581546	Mo17	1873	8:5560928-5561121	8:5561111-5561310	259	52	0.200772	TE-InDel	DNA/hAT	GRMZM2G017329	36.6707	-2.49831	0.712733	MO17	indel+	5	6	11	0.338459	ns
b0955	Zm00001d008333	8	5562984	5567351	+	8:5561856-5562145	8:5582287-5582287	B73	839	8:5561657-5561856	8:5562145-5562263	289	286	0.989619	TE-InDel	DNA/PIF-Harbinger	GRMZM2G017329	36.6707	-2.49831	0.712733	MO17	indel-	8	8	16	0.000367906	significant	indel-	consistent
b0956	Zm00001d008333	8	5562984	5567351	+	8:5562263-5562800	8:5582409-5582463	B73	184	8:5562145-5562263	8:5562800-5562964	537	319	0.594041	TE-InDel	DNA/PIF-Harbinger	GRMZM2G017329	36.6707	-2.49831	0.712733	MO17	indel-	10	6	16	0.0898227	ns
b0957	Zm00001d008342	8	5857214	5860199	+	8:5857051-5857059	8:5815793-5816024	Mo17	163	8:5856851-5857059	8:5857051-5857251	231	122	0.528139	TE-InDel	DNA/MuDR	GRMZM2G154896	29.7475	3.30889	0.603398	B73	indel-	6	3	9	0.825671	ns
b0958	Zm00001d008356	8	6168205	6172172	-	8:6172518-6172883	8:6070271-6070370	B73	346	8:6172332-6172518	8:6172883-6173059	365	363	0.994521	TE-InDel	DNA/PIF-Harbinger	GRMZM2G024655	39.7329	1.44668	0.751544	B73	indel+	2	14	16	0.83296	ns
b0959	Zm00001d008356	8	6168205	6172172	-	8:6174099-6174486	8:6071742-6071822	B73	1927	8:6173900-6174099	8:6174486-6174685	387	0	0	none-TE-InDel		GRMZM2G024655	39.7329	1.44668	0.751544	B73	indel+	8	8	16	0.118831	ns
b0960	Zm00001d008428	8	8437905	8450620	-	8:8452796-8454369	8:8793411-8793425	B73	2176	8:8452597-8452796	8:8454369-8454569	1573	1573	1	TE-InDel	LINE/L1	GRMZM2G035341	65.0186	13.0203	0.915046	B73	indel+	5	11	16	0.0554476	ns
b0961	Zm00001d008430	8	8610981	8613957	-	8:8615894-8616179	8:8965973-8965976	B73	1937	8:8615695-8615894	8:8616179-8616375	285	285	1	TE-InDel	DNA/hAT	GRMZM5G851914	29.1748	1.36472	0.641909	B73	indel+	8	8	16	0.310887	ns
b0962	Zm00001d008455	8	9190651	9194067	-	8:9194792-9194794	8:9873835-9873973	Mo17	727	8:9194595-9194794	8:9194792-9194991	138	138	1	TE-InDel	LTR/Copia	GRMZM2G138255	27.5916	-0.298993	0.590546	MO17	indel+	3	5	8	0.0268088	significant	indel+	consistent
b0963	Zm00001d008529	8	11903899	11907881	+	8:11901959-11901961	8:12922566-12922847	Mo17	1940	8:11901818-11901961	8:11901959-11902157	281	280	0.996441	TE-InDel	DNA/PIF-Harbinger	GRMZM2G112968	38.7336	-0.760608	0.717721	MO17	indel+	4	7	11	0.960858	ns
b0964	Zm00001d008529	8	11903899	11907881	+	8:11902173-11902209	8:12923063-12923306	Mo17	1690	8:11901976-11902173	8:11902209-11902405	243	182	0.748971	TE-InDel	DNA/PIF-Harbinger	GRMZM2G112968	38.7336	-0.760608	0.717721	MO17	indel+	8	6	14	0.103088	ns
b0965	Zm00001d008529	8	11903899	11907881	+	8:11902459-11902464	8:12923564-12924782	Mo17	1440	8:11902269-11902464	8:11902459-11902661	1218	514	0.422003	TE-InDel	DNA/Helitron	GRMZM2G112968	38.7336	-0.760608	0.717721	MO17	indel+	3	5	8	0.312596	ns
b0968	Zm00001d008752	8	18999372	19006082	-	8:19006114-19006507	8:20812872-20812874	B73	32	8:19005915-19006114	8:19006507-19006707	393	393	1	TE-InDel	DNA/hAT	GRMZM2G144403	24.6111	-0.508598	0.530757	MO17	indel-	5	11	16	0.308585	ns
b0969	Zm00001d008772	8	19580474	19585935	-	8:19586082-19586099	8:21312243-21312362	Mo17	147	8:19585911-19586082	8:19586099-19586293	119	0	0	none-TE-InDel		GRMZM2G088356	28.6477	0.302425	0.625774	B73	indel-	4	7	11	0.127252	ns
b0970	Zm00001d008772	8	19580474	19585935	-	8:19586317-19586319	8:21312576-21312938	Mo17	384	8:19586117-19586319	8:19586317-19586517	362	355	0.980663	TE-InDel	LTR/Gypsy	GRMZM2G088356	28.6477	0.302425	0.625774	B73	indel-	4	9	13	0.229752	ns
b0971	Zm00001d008782	8	19837108	19840416	-	8:19840590-19840641	8:21418884-21419796	Mo17	174	8:19840391-19840590	8:19840641-19840839	912	878	0.962719	TE-InDel	DNA/hAT	GRMZM2G125020	59.736	13.5601	0.856184	B73	indel-	4	7	11	0.864795	ns
b0973	Zm00001d008791	8	20367685	20375330	+	8:20363732-20364241	8:21932027-21932033	B73	3444	8:20363533-20363732	8:20364241-20364434	509	462	0.907662	TE-InDel	DNA/hAT	GRMZM2G167554	19.1107	1.8027	0.521169	B73	indel+	8	8	16	0.0723833	ns
b0974	Zm00001d008805	8	21004224	21007918	+	8:21002184-21002188	8:22637527-22637670	Mo17	2036	8:21001985-21002184	8:21002188-21002387	143	130	0.909091	TE-InDel	DNA/PIF-Harbinger	GRMZM2G161787	45.3722	1.14076	0.743771	B73	indel-	2	9	11	0.140912	ns
b0975	Zm00001d008805	8	21004224	21007918	+	8:21002538-21004002	8:22638016-22638024	B73	222	8:21002339-21002538	8:21004002-21004201	1464	1464	1	TE-InDel	DNA/hAT	GRMZM2G161787	45.3722	1.14076	0.743771	B73	indel+	5	11	16	0.571515	ns
b0976	Zm00001d008839	8	22128136	22132262	-	8:22133923-22133928	8:23639251-23640438	Mo17	1666	8:22133725-22133928	8:22133923-22134123	1187	1187	1	TE-InDel	LTR/Copia	GRMZM2G174570	27.2167	1.56756	0.677991	B73	indel-	2	11	13	0.00228258	significant	indel+	inconsistent
b0979	Zm00001d008866	8	23222125	23222877	-	8:23223362-23223771	8:24748208-24748211	B73	485	8:23223162-23223362	8:23223771-23223906	409	0	0	none-TE-InDel		GRMZM2G009475	39.9739	1.00415	0.779445	B73	indel+	7	9	16	0.279638	ns
b0980	Zm00001d008866	8	23222125	23222877	-	8:23223906-23224235	8:24748346-24748349	B73	1029	8:23223771-23223906	8:23224235-23224364	329	329	1	TE-InDel	DNA/PIF-Harbinger	GRMZM2G009475	39.9739	1.00415	0.779445	B73	indel+	9	7	16	0.240401	ns
b0982	Zm00001d008871	8	23386820	23390680	+	8:23384345-23384346	8:24888802-24888913	Mo17	2475	8:23384147-23384346	8:23384345-23384545	111	111	1	TE-InDel	LINE/L1	AC187157.4_FG002	41.1977	2.6098	0.812834	B73	indel-	3	11	14	0.178783	ns
b0983	Zm00001d008965	8	27711392	27715492	-	8:27716393-27716915	8:28819616-28819619	B73	901	8:27716206-27716393	8:27716915-27717024	522	338	0.64751	TE-InDel	DNA/PIF-Harbinger	GRMZM2G127687	41.4313	2.42546	0.789623	B73	indel+	8	8	16	0.108921	ns
b0984	Zm00001d008965	8	27711392	27715492	-	8:27717024-27720227	8:28819713-28819723	B73	1532	8:27716915-27717024	8:27720227-27720430	3203	2940	0.917889	TE-InDel	LTR/Gypsy	GRMZM2G127687	41.4313	2.42546	0.789623	B73	indel+	7	9	16	0.0865726	ns
b0986	Zm00001d009132	8	38686117	38690110	-	8:38690321-38690848	8:39999967-39999976	B73	211	8:38690168-38690321	8:38690848-38691047	527	527	1	TE-InDel	DNA/Helitron	AC191069.3_FG004	38.2093	-3.17628	0.755011	MO17	indel-	2	14	16	0.476488	ns
b0987	Zm00001d009132	8	38686117	38690110	-	8:38691659-38691663	8:40000775-40001181	Mo17	1549	8:38691460-38691659	8:38691663-38691840	406	336	0.827586	TE-InDel	Unknown	AC191069.3_FG004	38.2093	-3.17628	0.755011	MO17	indel+	10	3	13	0.1089	ns
b0988	Zm00001d009402	8	62916759	62917979	+	8:62915854-62916682	8:63004878-63004887	B73	77	8:62915655-62915854	8:62916682-62916882	828	697	0.841787	TE-InDel	LTR/Gypsy	GRMZM2G080116	45.6583	0.698554	0.78701	B73	indel+	3	13	16	0.0368784	significant	indel-	inconsistent
b0989	Zm00001d009431	8	64107616	64111865	-	8:64112000-64112596	8:64150561-64150566	B73	135	8:64111801-64112000	8:64112596-64112770	596	527	0.884228	TE-InDel	DNA/PIF-Harbinger	GRMZM2G168681	31.8304	3.32043	0.626931	B73	indel+	4	12	16	0.974121	ns
b0990	Zm00001d009661	8	74956156	74962734	-	8:74963244-74963622	8:75017901-75017903	B73	510	8:74963049-74963244	8:74963622-74963819	378	369	0.97619	TE-InDel	DNA/PIF-Harbinger	GRMZM2G063025	46.6248	1.47073	0.760069	B73	indel+	6	10	16	0.728753	ns
b0993	Zm00001d009774	8	80508328	80511529	-	8:80511595-80511862	8:80647370-80647381	B73	66	8:80511396-80511595	8:80511862-80512061	267	256	0.958801	TE-InDel	DNA/PIF-Harbinger	GRMZM2G125893	25.3651	4.58936	0.553195	B73	indel+	8	8	16	0.023786	significant	indel+	consistent
b0994	Zm00001d009910	8	89031988	89036730	-	8:89036821-89036977	8:88565549-88565557	B73	91	8:89036622-89036821	8:89036977-89037162	156	156	1	TE-InDel	DNA/Helitron	GRMZM2G145573	68.3013	8.39726	0.888696	B73	indel+	5	11	16	0.387912	ns
b0995	Zm00001d010048	8	96823511	96826858	+	8:96821862-96821867	8:95776889-95777289	Mo17	1649	8:96821662-96821867	8:96821862-96822051	400	0	0	none-TE-InDel		GRMZM2G006745	37.4506	1.07373	0.72691	B73	indel-	4	6	10	0.496002	ns
b0996	Zm00001d010048	8	96823511	96826858	+	8:96822799-96823239	8:95778267-95778305	B73	272	8:96822611-96822799	8:96823239-96823434	440	299	0.679545	TE-InDel	DNA/PIF-Harbinger	GRMZM2G006745	37.4506	1.07373	0.72691	B73	indel+	8	8	16	0.918911	ns
b0998	Zm00001d010213	8	104356766	104359468	+	8:104354272-104356538	8:102801025-102801032	B73	228	8:104354115-104354272	8:104356538-104356734	2266	2038	0.899382	TE-InDel	LTR/Gypsy	GRMZM2G111596	23.6678	1.30434	0.517317	B73	indel+	8	8	16	0.0205416	significant	indel+	consistent
b0999	Zm00001d010214	8	104421415	104424050	-	8:104424280-104424290	8:102815847-102816267	Mo17	230	8:104424093-104424280	8:104424290-104424390	420	302	0.719048	TE-InDel	DNA/PIF-Harbinger	GRMZM2G414373	33.0128	-1.65507	0.686683	MO17	indel+	1	10	11
b1000	Zm00001d010235	8	105392133	105402990	-	8:105403059-105403068	8:103862646-103863149	Mo17	78	8:105402869-105403068	8:105403059-105403203	503	338	0.671968	TE-InDel	DNA/hAT	GRMZM2G408096	21.0345	3.28667	0.544263	B73	indel-	1	12	13
b1001	Zm00001d010244	8	105840363	105843126	-	8:105847758-105847761	8:104265209-104266870	Mo17	4635	8:105847565-105847761	8:105847758-105847958	1661	1405	0.845876	TE-InDel	LTR/Copia	GRMZM2G016153	19.9769	-0.973453	0.52231	MO17	indel+	5	7	12	0.29009	ns
b1002	Zm00001d010274	8	106962806	106966802	-	8:106966832-106966834	8:105236299-105236426	Mo17	32	8:106966643-106966834	8:106966832-106967029	127	125	0.984252	TE-InDel	DNA	GRMZM2G145029	33.3871	0.977344	0.658865	B73	indel-	7	9	16	0.464349	ns
b1003	Zm00001d010447	8	115541975	115546228	+	8:115541126-115541134	8:113539879-113540035	Mo17	849	8:115540943-115541134	8:115541126-115541325	156	156	1	TE-InDel	DNA	GRMZM2G110584	27.9517	-0.761906	0.592295	MO17	indel+	2	11	13	0.428129	ns
b1004	Zm00001d010558	8	120340485	120345629	+	8:120340296-120340311	8:118594528-118594894	Mo17	174	8:120340099-120340296	8:120340311-120340454	366	314	0.857923	TE-InDel	DNA/PIF-Harbinger	GRMZM2G422641	28.954	0.266684	0.60988	B73	indel-	2	11	13	0.250474	ns
b1005	Zm00001d010604	8	121656899	121661464	+	8:121652317-121652319	8:119952028-119952166	Mo17	4582	8:121652120-121652319	8:121652317-121652517	138	138	1	TE-InDel	LTR/Gypsy	GRMZM2G065593	38.4831	-3.04225	0.544148	MO17	indel+	0	13	13
b1006	Zm00001d010604	8	121656899	121661464	+	8:121656214-121656529	8:119956084-119956086	B73	370	8:121656015-121656214	8:121656529-121656729	315	311	0.987302	TE-InDel	DNA/PIF-Harbinger	GRMZM2G065593	38.4831	-3.04225	0.544148	MO17	indel-	6	10	16	0.431532	ns
b1007	Zm00001d010614	8	121855840	121858325	-	8:121861055-121861068	8:120394978-120395287	Mo17	2743	8:121860869-121861068	8:121861055-121861254	309	224	0.724919	TE-InDel	DNA/Helitron	GRMZM5G827266	33.7006	57.6155	0.58661	B73	indel-	2	14	16	0.89123	ns
b1008	Zm00001d010736	8	126378027	126380486	+	8:126377503-126377850	8:125384480-125384488	B73	177	8:126377387-126377503	8:126377850-126378049	347	315	0.907781	TE-InDel	DNA/PIF-Harbinger	AC209819.3_FG005	74.5123	22.4065	0.932612	B73	indel+	8	7	15	0.441733	ns
b1009	Zm00001d010785	8	127752529	127754303	+	8:127751414-127751698	8:126777185-126777190	B73	831	8:127751215-127751414	8:127751698-127751898	284	284	1	TE-InDel	DNA/PIF-Harbinger	GRMZM2G135381	26.2216	0.272982	0.529372	B73	indel+	3	13	16	0.808578	ns
b1010	Zm00001d010912	8	133267006	133267993	-	8:133270344-133270351	8:132492413-132492946	Mo17	2358	8:133270147-133270351	8:133270344-133270535	533	532	0.998124	TE-InDel	DNA/hAT	GRMZM2G323415	30.1696	0.249253	0.649428	B73	indel-	3	10	13	0.677129	ns
b1011	Zm00001d010918	8	133384901	133388865	+	8:133383984-133384739	8:132597918-132598001	B73	162	8:133383789-133383984	8:133384739-133384938	755	464	0.61457	TE-InDel	DNA/PIF-Harbinger	GRMZM2G042593	45.4055	2.30078	0.820855	B73	indel+	9	7	16	0.74372	ns
b1012	Zm00001d010936	8	134114418	134119217	-	8:134122964-134123184	8:133381150-133381154	B73	3747	8:134122765-134122964	8:134123184-134123386	220	164	0.745455	TE-InDel	LTR/Gypsy	GRMZM2G178686	57.977	10.5818	0.917745	B73	indel+	13	3	16	0.446504	ns
b1013	Zm00001d010946	8	134633259	134637535	+	8:134632699-134632699	8:133783115-133786546	Mo17	560	8:134632500-134632699	8:134632699-134632900	3431	676	0.197027	TE-InDel	DNA/Helitron	GRMZM2G034043	46.5221	-5.08856	0.709384	MO17	indel+	1	12	13
b1014	Zm00001d011051	8	137414912	137418125	-	8:137418521-137418522	8:136872814-136873190	Mo17	396	8:137418322-137418521	8:137418522-137418720	376	375	0.99734	TE-InDel	DNA/PIF-Harbinger	GRMZM2G083847	27.1721	2.27134	0.564133	B73	indel-	5	6	11	0.121181	ns
b1016	Zm00001d011135	8	140019374	140028075	-	8:140028828-140028830	8:139389628-139390251	Mo17	755	8:140028640-140028830	8:140028828-140029007	623	322	0.516854	TE-InDel	DNA/hAT	GRMZM2G088132	35.8576	-1.32741	0.695355	MO17	indel+	4	8	12	0.69084	ns
b1018	Zm00001d011993	8	166037850	166039713	-	8:166042823-166043058	8:166681121-166681123	B73	3110	8:166042632-166042823	8:166043058-166043166	235	220	0.93617	TE-InDel	DNA	GRMZM2G145496	26.3443	-3.52128	0.575905	MO17	indel-	8	8	16	0.226758	ns
b1019	Zm00001d011993	8	166037850	166039713	-	8:166043166-166043479	8:166681222-166681226	B73	3453	8:166043058-166043166	8:166043479-166043674	313	311	0.99361	TE-InDel	DNA/PIF-Harbinger	GRMZM2G145496	26.3443	-3.52128	0.575905	MO17	indel-	6	10	16	0.0349429	significant	indel-	consistent
b1020	Zm00001d011993	8	166037850	166039713	-	8:166043830-166043994	8:166681570-166681574	B73	4117	8:166043631-166043830	8:166043994-166044189	164	164	1	TE-InDel	NonLTR/Penelope	GRMZM2G145496	26.3443	-3.52128	0.575905	MO17	indel-	7	9	16	0.229653	ns
b1021	Zm00001d012064	8	167543593	167547578	+	8:167539439-167539806	8:168439463-168439466	B73	3787	8:167539240-167539439	8:167539806-167539994	367	226	0.615804	TE-InDel	DNA/PIF-Harbinger	GRMZM2G031204	85.6209	-10.5713	0.970112	MO17	indel-	9	7	16	0.0516335	ns
b1022	Zm00001d012064	8	167543593	167547578	+	8:167540827-167540842	8:168440546-168441099	Mo17	2751	8:167540727-167540827	8:167540842-167541028	553	408	0.737794	TE-InDel	DNA/hAT	GRMZM2G031204	85.6209	-10.5713	0.970112	MO17	indel+	5	9	14	0.715415	ns
b1023	Zm00001d012064	8	167543593	167547578	+	8:167543152-167543153	8:168443405-168443726	Mo17	440	8:167542960-167543152	8:167543153-167543353	321	314	0.978193	TE-InDel	DNA/PIF-Harbinger	GRMZM2G031204	85.6209	-10.5713	0.970112	MO17	indel+	7	7	14	0.377084	ns
b1024	Zm00001d012102	8	168283208	168289577	+	8:168282244-168282311	8:169238203-169238582	Mo17	897	8:168282056-168282244	8:168282311-168282506	379	379	1	TE-InDel	DNA/hAT	GRMZM2G065971	63.3859	1.49247	0.876643	B73	indel-	7	5	12	0.586311	ns
b1025	Zm00001d012102	8	168283208	168289577	+	8:168283016-168283065	8:169239291-169239459	Mo17	143	8:168282817-168283016	8:168283065-168283264	168	127	0.755952	TE-InDel	DNA	GRMZM2G065971	63.3859	1.49247	0.876643	B73	indel-	3	9	12	0.482047	ns
b1026	Zm00001d012146	8	168883542	168888435	+	8:168879529-168879730	8:169740372-169740375	B73	3812	8:168879330-168879529	8:168879730-168879935	201	201	1	TE-InDel	DNA	GRMZM5G821267	35.0249	1.51926	0.715997	B73	indel+	7	9	16	0.11706	ns
b1027	Zm00001d012146	8	168883542	168888435	+	8:168881021-168881024	8:169741098-169741647	Mo17	2521	8:168880825-168881024	8:168881021-168881218	549	294	0.535519	TE-InDel	DNA/TcMar-Stowaway	GRMZM5G821267	35.0249	1.51926	0.715997	B73	indel-	2	9	11	0.210172	ns
b1028	Zm00001d012146	8	168883542	168888435	+	8:168882070-168882363	8:169742685-169742689	B73	1179	8:168881871-168882070	8:168882363-168882562	293	293	1	TE-InDel	DNA/Helitron	GRMZM5G821267	35.0249	1.51926	0.715997	B73	indel+	7	9	16	0.0864291	ns
b1029	Zm00001d012176	8	169557355	169562468	+	8:169555122-169555138	8:170473115-170474803	Mo17	2217	8:169554923-169555122	8:169555138-169555337	1688	1028	0.609005	TE-InDel	DNA/PIF-Harbinger	GRMZM2G117405	65.5184	0.933207	0.737706	B73	indel-	7	7	14	0.638804	ns
b1031	Zm00001d012206	8	170076975	170078757	+	8:170076301-170076310	8:171208343-171210458	Mo17	674	8:170076102-170076310	8:170076301-170076481	2115	274	0.129551	TE-InDel	LTR/Gypsy	GRMZM2G068361	27.7548	1.90289	0.674508	B73	indel-	3	11	14	0.365088	ns
b1032	Zm00001d012224	8	170419466	170424898	-	8:170427487-170427489	8:171670303-171670446	Mo17	2591	8:170427303-170427489	8:170427487-170427679	143	52	0.363636	TE-InDel	Simple_repeat	GRMZM2G002023	38.7573	5.23871	0.73853	B73	indel-	2	12	14	0.418724	ns
b1033	Zm00001d012224	8	170419466	170424898	-	8:170427679-170427872	8:171670632-171670636	B73	2781	8:170427487-170427679	8:170427872-170428057	193	158	0.818653	TE-InDel	LTR/Gypsy	GRMZM2G002023	38.7573	5.23871	0.73853	B73	indel+	12	4	16	0.904468	ns
b1034	Zm00001d012231	8	170532866	170534989	+	8:170531190-170531725	8:171812289-171812303	B73	1141	8:170530991-170531190	8:170531725-170531922	535	343	0.641121	TE-InDel	DNA/hAT	GRMZM2G096407	20.4473	3.4527	0.510965	B73	indel+	6	10	16	0.642994	ns
b1038	Zm00001d012418	8	174169491	174171263	-	8:174172698-174172701	8:175895724-175896162	Mo17	1435	8:174172501-174172698	8:174172701-174172900	438	0	0	none-TE-InDel		GRMZM2G036120	33.1865	0.576591	0.686731	B73	indel-	11	5	16	0.0192854	significant	indel-	consistent
b1039	Zm00001d012418	8	174169491	174171263	-	8:174173528-174173533	8:175896957-175897074	Mo17	2270	8:174173342-174173533	8:174173528-174173737	117	117	1	TE-InDel	DNA/PIF-Harbinger	GRMZM2G036120	33.1865	0.576591	0.686731	B73	indel-	8	6	14	0.124096	ns
b1040	Zm00001d012448	8	174720307	174723576	-	8:174725077-174725079	8:176303755-176303934	Mo17	1503	8:174724880-174725079	8:174725077-174725277	179	150	0.837989	TE-InDel	DNA/Helitron	GRMZM2G700806	31.2294	1.20337	0.64488	B73	indel-	6	7	13	0.0401723	significant	indel-	consistent
b1041	Zm00001d012458	8	174858650	174861025	+	8:174857176-174857454	8:176374855-176374857	B73	1196	8:174856977-174857176	8:174857454-174857606	278	192	0.690647	TE-InDel	DNA/PIF-Harbinger	GRMZM5G897342	55.9941	3.78373	0.854824	B73	indel+	5	11	16	0.427541	ns
b1042	Zm00001d012463	8	174967533	174969278	+	8:174967281-174967292	8:176525268-176527144	Mo17	252	8:174967092-174967292	8:174967281-174967475	1876	1876	1	TE-InDel	Simple_repeat	GRMZM2G069215	30.7877	0.661673	0.657311	B73	indel-	4	6	10	0.0882784	ns
b1043	Zm00001d012467	8	175045544	175067069	-	8:175067681-175067875	8:176583642-176583643	B73	612	8:175067487-175067681	8:175067875-175068065	194	189	0.974227	TE-InDel	DNA/PIF-Harbinger	GRMZM5G832582	35.383	1.38621	0.730491	B73	indel+	6	10	16	0.0511818	ns
b1044	Zm00001d012474	8	175162648	175164824	-	8:175165640-175166412	8:176679577-176679581	B73	816	8:175165441-175165640	8:175166412-175166615	772	675	0.874352	TE-InDel	DNA/hAT	GRMZM2G011233	36.4751	0.63517	0.665554	B73	indel+	5	11	16	0.676823	ns
b1045	Zm00001d012474	8	175162648	175164824	-	8:175166879-175167397	8:176680048-176680054	B73	2055	8:175166708-175166879	8:175167397-175167543	518	504	0.972973	TE-InDel	LINE/L1	GRMZM2G011233	36.4751	0.63517	0.665554	B73	indel+	7	9	16	0.835248	ns
b1046	Zm00001d012476	8	175266420	175268144	+	8:175264506-175264639	8:176717058-176717059	B73	1781	8:175264307-175264506	8:175264639-175264839	133	133	1	TE-InDel	DNA/PIF-Harbinger	GRMZM2G043632	37.2101	1.07984	0.710673	B73	indel+	5	11	16	0.000247491	significant	indel+	consistent
b1047	Zm00001d012476	8	175266420	175268144	+	8:175265339-175265545	8:176717748-176717754	B73	875	8:175265140-175265339	8:175265545-175265737	206	106	0.514563	TE-InDel	NonLTR/SINE	GRMZM2G043632	37.2101	1.07984	0.710673	B73	indel+	6	10	16	0.000509362	significant	indel+	consistent
b1048	Zm00001d012492	8	175443577	175446159	-	8:175448918-175449064	8:176919401-176919415	B73	2759	8:175448731-175448918	8:175449064-175449246	146	140	0.958904	TE-InDel	LTR/Copia	GRMZM2G019612	19.5274	1.42023	0.513088	B73	indel+	2	14	16	0.927882	ns
b1049	Zm00001d012503	8	175558015	175570673	+	8:175555508-175555522	8:177076308-177076906	Mo17	2507	8:175555323-175555522	8:175555508-175555630	598	597	0.998328	TE-InDel	DNA/hAT	GRMZM2G166345	21.9252	-2.29207	0.539693	MO17	indel+	5	7	12	0.523371	ns
b1051	Zm00001d012522	8	176046167	176049646	+	8:176045622-176045975	8:177445711-177445714	B73	192	8:176045439-176045622	8:176045975-176046165	353	283	0.8017	TE-InDel	NonLTR/SINE	GRMZM2G130764	27.9093	0.833874	0.537829	B73	indel+	11	5	16	0.0387698	significant	indel-	inconsistent
b1052	Zm00001d012556	8	176577453	176580718	-	8:176581335-176581361	8:178042641-178043181	Mo17	617	8:176581136-176581335	8:176581361-176581560	540	0	0	none-TE-InDel		GRMZM2G172932	29.0135	-12.4116	0.575775	MO17	indel+	4	12	16	0.636725	ns
b1053	Zm00001d012556	8	176577453	176580718	-	8:176582641-176582644	8:178044485-178044761	Mo17	1926	8:176582441-176582644	8:176582641-176582841	276	200	0.724638	TE-InDel	DNA/Helitron	GRMZM2G172932	29.0135	-12.4116	0.575775	MO17	indel+	3	12	15	0.265967	ns
b1054	Zm00001d012571	8	176802144	176808472	-	8:176811328-176811671	8:178432985-178432987	B73	2856	8:176811129-176811328	8:176811671-176811871	343	332	0.96793	TE-InDel	DNA/PIF-Harbinger	GRMZM2G091006	57.424	7.01451	0.843865	B73	indel+	3	13	16	0.148179	ns
b1055	Zm00001d012603	8	177064376	177066295	-	8:177066445-177066453	8:178728030-178728210	Mo17	158	8:177066252-177066453	8:177066445-177066642	180	168	0.933333	TE-InDel	DNA	GRMZM2G440003	33.7681	0.349932	0.725214	B73	indel-	1	9	10
b1056	Zm00001d012604	8	177070569	177080643	-	8:177082942-177082999	8:178775172-178775724	Mo17	2299	8:177082746-177082942	8:177082999-177083186	552	317	0.574275	TE-InDel	Simple_repeat	GRMZM2G139175	31.1701	0.240752	0.559447	B73	indel-	1	12	13
b1057	Zm00001d012725	8	179214402	179228713	-	8:179229590-179229847	8:180733261-180733269	B73	877	8:179229391-179229590	8:179229847-179230051	257	256	0.996109	TE-InDel	DNA/MuDR	GRMZM2G148022	25.7246	0.580149	0.518256	B73	indel+	5	11	16	0.325594	ns
b1058	Zm00001d012725	8	179214402	179228713	-	8:179231170-179231489	8:180734361-180734367	B73	2457	8:179230980-179231170	8:179231489-179231687	319	319	1	TE-InDel	DNA	GRMZM2G148022	25.7246	0.580149	0.518256	B73	indel+	9	7	16	0.683329	ns
b1059	Zm00001d012731	8	179454361	179460511	+	8:179451928-179451932	8:180879440-180879818	Mo17	2433	8:179451742-179451932	8:179451928-179452128	378	152	0.402116	TE-InDel	DNA/PIF-Harbinger	GRMZM5G874163	20.9838	1.34135	0.528624	B73	indel-	1	5	6
b1061	Zm00001d012763	8	180226489	180258297	-	8:180258858-180258860	8:181610752-181611116	Mo17	563	8:180258730-180258860	8:180258858-180259058	364	193	0.53022	TE-InDel	DNA/PIF-Harbinger	GRMZM2G124883	58.4751	2.59772	0.918777	B73	indel-	9	6	15	0.561999	ns
b1062	Zm00001d044725	9	470208	470864	+	9:469686-469695	9:1063175-1063475	Mo17	522	9:469497-469695	9:469686-469878	300	80	0.266667	TE-InDel	DNA/hAT	GRMZM2G415022	29.6412	-0.32978	0.668941	MO17	indel+	8	5	13	0.211549	ns
b1063	Zm00001d044729	9	639206	642733	-	9:645977-646478	9:1244973-1245017	B73	3244	9:645778-645977	9:646478-646680	501	313	0.62475	TE-InDel	DNA/TcMar-Stowaway	GRMZM2G063765	21.9244	0.738137	0.51302	B73	indel+	9	7	16	0.22034	ns
b1064	Zm00001d044748	9	1120172	1124593	+	9:1118913-1119559	9:1826766-1826769	B73	613	9:1118722-1118913	9:1119559-1119761	646	395	0.611455	TE-InDel	DNA/hAT	GRMZM2G027627	52.554	1.10066	0.776759	B73	indel+	8	8	16	0.224488	ns
b1066	Zm00001d044923	9	7307942	7308288	-	9:7308602-7308605	9:8158818-8159478	Mo17	317	9:7308427-7308605	9:7308602-7308802	660	639	0.968182	TE-InDel	DNA/hAT	GRMZM2G408174	34.8313	9.11435	0.683615	B73	indel-	6	7	13	0.677748	ns
b1069	Zm00001d045046	9	10972295	10977439	+	9:10970891-10971695	9:12500427-12500476	B73	600	9:10970693-10970891	9:10971695-10971894	804	533	0.662935	TE-InDel	DNA/PIF-Harbinger	GRMZM2G024530	31.9823	-1.2346	0.670875	MO17	indel-	5	10	15	0.546371	ns
b1070	Zm00001d045076	9	11780929	11784701	-	9:11786486-11786488	9:13392744-13393548	Mo17	1785	9:11786287-11786486	9:11786488-11786686	804	232	0.288557	TE-InDel	LTR/Gypsy	GRMZM2G151923	49.5504	8.72431	0.789681	B73	indel-	1	7	8
b1071	Zm00001d045076	9	11780929	11784701	-	9:11786780-11786954	9:13393841-13394309	Mo17	2079	9:11786582-11786780	9:11786954-11787147	468	329	0.702991	TE-InDel	DNA/hAT	GRMZM2G151923	49.5504	8.72431	0.789681	B73	indel-	1	11	12
b1072	Zm00001d045076	9	11780929	11784701	-	9:11787297-11787675	9:13394654-13394658	B73	2596	9:11787098-11787297	9:11787675-11787875	378	218	0.57672	TE-InDel	DNA/PIF-Harbinger	GRMZM2G151923	49.5504	8.72431	0.789681	B73	indel+	10	6	16	0.877542	ns
b1073	Zm00001d045080	9	11803157	11825109	-	9:11827583-11827587	9:13455571-13455888	Mo17	2478	9:11827384-11827587	9:11827583-11827782	317	317	1	TE-InDel	DNA/PIF-Harbinger	GRMZM2G455243	56.8088	2.55084	0.883638	B73	indel-	1	8	9
b1074	Zm00001d045080	9	11803157	11825109	-	9:11827824-11827835	9:13456140-13457730	Mo17	2726	9:11827636-11827835	9:11827824-11828021	1590	1590	1	TE-InDel	DNA/Helitron	GRMZM2G455243	56.8088	2.55084	0.883638	B73	indel-	4	7	11	0.0043449	significant	indel-	consistent
b1075	Zm00001d045176	9	15130427	15142041	-	9:15142152-15142168	9:16861623-16861875	Mo17	127	9:15141967-15142168	9:15142152-15142351	252	251	0.996032	TE-InDel	DNA/MuDR	GRMZM2G029370	32.843	1.163	0.607533	B73	indel-	2	14	16	0.159621	ns
b1076	Zm00001d045179	9	15312594	15322747	+	9:15311209-15311442	9:16948604-16948606	B73	1152	9:15311010-15311209	9:15311442-15311642	233	212	0.909871	TE-InDel	DNA/PIF-Harbinger	GRMZM5G824137	19.7616	0.440923	0.520999	B73	indel+	10	6	16	0.143498	ns
b1077	Zm00001d045397	9	20623494	20630674	+	9:20622847-20622848	9:22153735-22153921	Mo17	647	9:20622649-20622848	9:20622847-20623025	186	0	0	none-TE-InDel		GRMZM2G433433	31.5097	0.744169	0.711009	B73	indel-	4	8	12	0.0524368	ns
b1078	Zm00001d045423	9	21633058	21633435	-	9:21636814-21637349	9:23075481-23075514	B73	3379	9:21636628-21636814	9:21637349-21637548	535	370	0.691589	TE-InDel	DNA/PIF-Harbinger	GRMZM2G144421	43.9937	0.800714	0.834531	B73	indel+	3	13	16
b1079	Zm00001d045431	9	21923413	21927989	+	9:21921973-21921981	9:23297277-23297435	Mo17	1440	9:21921771-21921981	9:21921973-21922168	158	155	0.981013	TE-InDel	DNA/hAT	GRMZM2G064302	25.0885	22.4922	0.554512	B73	indel-	5	5	10	0.26859	ns
b1080	Zm00001d045459	9	23089455	23089748	+	9:23088867-23088887	9:24599474-24600078	Mo17	588	9:23088762-23088887	9:23088867-23089069	604	542	0.897351	TE-InDel	DNA/hAT	GRMZM2G404608	31.9426	0.367343	0.758589	B73	indel-	4	3	7	0.711582	ns
b1081	Zm00001d045518	9	25254154	25256961	-	9:25258494-25258826	9:26811755-26811759	B73	1533	9:25258295-25258494	9:25258826-25259025	332	325	0.978916	TE-InDel	DNA/PIF-Harbinger	GRMZM5G882758	57.3379	0.382918	0.861871	B73	indel+	8	8	16	0.201602	ns
b1082	Zm00001d045540	9	25852225	25855075	+	9:25848026-25848176	9:27402963-27402978	B73	4049	9:25847827-25848026	9:25848176-25848380	150	107	0.713333	TE-InDel	DNA/Helitron	GRMZM2G041994	41.4488	1.97778	0.805988	B73	indel+	2	14	16	0.192587	ns
b1084	Zm00001d045685	9	33208139	33209281	-	9:33210303-33211125	9:34261819-34261903	B73	1022	9:33210104-33210303	9:33211125-33211332	822	311	0.378345	TE-InDel	DNA/PIF-Harbinger	GRMZM2G105364	32.6321	12.3997	0.703583	B73	indel+	6	10	16	0.138439	ns
b1085	Zm00001d045685	9	33208139	33209281	-	9:33211367-33211373	9:34262149-34262535	Mo17	2092	9:33211174-33211373	9:33211367-33211569	386	271	0.702073	TE-InDel	DNA/PIF-Harbinger	GRMZM2G105364	32.6321	12.3997	0.703583	B73	indel-	5	7	12	0.387138	ns
b1086	Zm00001d045784	9	38914713	38917486	+	9:38912797-38913185	9:40467657-40467671	B73	1528	9:38912588-38912797	9:38913185-38913384	388	282	0.726804	TE-InDel	DNA/PIF-Harbinger	GRMZM2G099745	22.8208	-3.40458	0.611133	MO17	indel-	1	15	16
b1087	Zm00001d045894	9	46154237	46159068	+	9:46150872-46153769	9:47564392-47564396	B73	468	9:46150671-46150872	9:46153769-46153968	2897	2897	1	TE-InDel	LINE/RTE-BovB	GRMZM2G082962	95.2016	9.25362	0.965739	B73	indel+	3	13	16	0.000178291	significant	indel+	consistent
b1088	Zm00001d045944	9	48378179	48386336	-	9:48386432-48386596	9:49244684-49244686	B73	96	9:48386233-48386432	9:48386596-48386796	164	127	0.77439	TE-InDel	DNA/PIF-Harbinger	GRMZM2G172152	45.4409	1.90196	0.805253	B73	indel+	2	14	16	0.194716	ns
b1089	Zm00001d045956	9	49735609	49744738	+	9:49735346-49735349	9:50561874-50562053	Mo17	263	9:49735150-49735349	9:49735346-49735546	179	179	1	TE-InDel	DNA/PIF-Harbinger	GRMZM2G027860	30.7725	1.82332	0.665271	B73	indel-	5	8	13	0.207556	ns
b1090	Zm00001d046485	9	92004665	92008946	+	9:92003424-92003431	9:92332852-92333919	Mo17	1234	9:92003228-92003424	9:92003431-92003628	1067	561	0.525773	TE-InDel	DNA/hAT	GRMZM2G148702	30.2716	1.29605	0.65392	B73	indel-	10	3	13	0.945716	ns
b1091	Zm00001d046489	9	92154833	92157937	-	9:92158432-92158610	9:92511643-92511646	B73	495	9:92158233-92158432	9:92158610-92158811	178	178	1	TE-InDel	DNA/PIF-Harbinger	GRMZM2G019586	43.962	15.3625	0.740072	B73	indel+	5	11	16	0.175375	ns
b1092	Zm00001d046564	9	96085990	96091648	+	9:96084944-96084955	9:96592469-96592653	Mo17	1046	9:96084758-96084955	9:96084944-96085154	184	184	1	TE-InDel	DNA	GRMZM2G050912	28.8942	0.40399	0.651285	B73	indel-	4	11	15	0.948969	ns
b1093	Zm00001d046889	9	108887959	108896845	-	9:108896928-108897623	9:110749291-110749298	B73	83	9:108896729-108896928	9:108897623-108897818	695	694	0.998561	TE-InDel	DNA/hAT	GRMZM2G085246	47.6003	-3.62281	0.784386	MO17	indel-	8	8	16	0.230503	ns
b1094	Zm00001d046891	9	109207816	109208076	+	9:109206062-109206062	9:111076661-111077152	Mo17	1754	9:109205863-109206062	9:109206062-109206258	491	491	1	TE-InDel	DNA/PIF-Harbinger	GRMZM2G397927	32.6898	1.26601	0.703836	B73	indel-	1	13	14
b1095	Zm00001d046916	9	110415245	110418645	-	9:110419476-110419516	9:112217135-112219472	Mo17	871	9:110419317-110419516	9:110419476-110419659	2337	2047	0.875909	TE-InDel	DNA/Helitron	GRMZM2G055273	33.9321	-2.85301	0.730787	MO17	indel+	4	12	16	0.377861	ns
b1096	Zm00001d046966	9	113387293	113387613	+	9:113385078-113385395	9:115175962-115175966	B73	1898	9:113384879-113385078	9:113385395-113385598	317	316	0.996845	TE-InDel	DNA/PIF-Harbinger	GRMZM2G451746	36.9809	1.01113	0.680372	B73	indel+	7	9	16	0.00367675	significant	indel+	consistent
b1097	Zm00001d046966	9	113387293	113387613	+	9:113385785-113386098	9:115176351-115176352	B73	1195	9:113385586-113385785	9:113386098-113386261	313	106	0.338658	TE-InDel	DNA	GRMZM2G451746	36.9809	1.01113	0.680372	B73	indel+	10	6	16	0.00529875	significant	indel+	consistent
b1098	Zm00001d046978	9	113853719	113862748	+	9:113851158-113851161	9:115626233-115626897	Mo17	2561	9:113850982-113851161	9:113851158-113851350	664	508	0.76506	TE-InDel	DNA/PIF-Harbinger	GRMZM2G156648	33.7788	-1.16368	0.702544	MO17	indel+	1	8	9
b1099	Zm00001d047124	9	119370184	119372706	-	9:119372960-119372967	9:122655750-122656325	Mo17	261	9:119372799-119372967	9:119372960-119373152	575	574	0.998261	TE-InDel	DNA/hAT	GRMZM2G117956	55.3764	7.20769	0.782453	B73	indel-	3	6	9	0.0116252	significant	indel-	consistent
b1100	Zm00001d047238	9	123555214	123561482	-	9:123561571-123561605	9:127229522-127230127	Mo17	89	9:123561372-123561571	9:123561605-123561804	605	312	0.515702	TE-InDel	DNA/PIF-Harbinger	GRMZM2G004222	50.7161	2.15045	0.839148	B73	indel-	6	8	14	0.412189	ns
b1101	Zm00001d047275	9	125242433	125245017	-	9:125245136-125245138	9:128660967-128661309	Mo17	121	9:125244936-125245138	9:125245136-125245336	342	311	0.909357	TE-InDel	DNA	GRMZM2G109286	21.6884	0.232029	0.512001	B73	indel-	0	3	3
b1102	Zm00001d047275	9	125242433	125245017	-	9:125245339-125245469	9:128661501-128661502	B73	322	9:125245143-125245339	9:125245469-125245660	130	130	1	TE-InDel	DNA/PIF-Harbinger	GRMZM2G109286	21.6884	0.232029	0.512001	B73	indel+	2	14	16	0.0717033	ns
b1103	Zm00001d047292	9	125675077	125682774	-	9:125684207-125684442	9:129164431-129164432	B73	1433	9:125684008-125684207	9:125684442-125684641	235	83	0.353191	TE-InDel	DNA	GRMZM2G054020	43.7947	1.47525	0.758629	B73	indel+	13	3	16	0.536159	ns
b1104	Zm00001d047340	9	126972983	126974226	-	9:126974548-126976399	9:130508903-130508996	B73	322	9:126974351-126974548	9:126976399-126976598	1851	1812	0.97893	TE-InDel	DNA/MuDR	GRMZM2G415793	27.0429	5.70296	0.601463	B73	indel+	9	7	16	0.107222	ns
b1105	Zm00001d047340	9	126972983	126974226	-	9:126977440-126978562	9:130510018-130510028	B73	3214	9:126977241-126977440	9:126978562-126978763	1122	1115	0.993761	TE-InDel	DNA/Helitron	GRMZM2G415793	27.0429	5.70296	0.601463	B73	indel+	9	7	16	0.0604892	ns
b1106	Zm00001d047340	9	126972983	126974226	-	9:126978812-126978816	9:130510260-130510498	Mo17	4586	9:126978614-126978812	9:126978816-126979015	238	221	0.928571	TE-InDel	DNA	GRMZM2G415793	27.0429	5.70296	0.601463	B73	indel-	2	8	10	0.333031	ns
b1107	Zm00001d047362	9	127731191	127738162	+	9:127728917-127729374	9:131295199-131295204	B73	1817	9:127728720-127728917	9:127729374-127729583	457	345	0.754923	TE-InDel	LTR/Copia	GRMZM2G174286	35.2735	1.58639	0.658989	B73	indel+	11	5	16	0.512608	ns
b1108	Zm00001d047402	9	128990269	128992830	+	9:128989580-128989668	9:132607792-132608077	Mo17	601	9:128989389-128989580	9:128989668-128989862	285	0	0	none-TE-InDel		GRMZM5G880028	61.0037	1.63067	0.912076	B73	indel-	6	9	15	0.232937	ns
b1109	Zm00001d047427	9	129719179	129720331	+	9:129716953-129716964	9:133540188-133541105	Mo17	2226	9:129716766-129716964	9:129716953-129717153	917	818	0.892039	TE-InDel	DNA/hAT	GRMZM2G117779	47.0608	1.55402	0.837718	B73	indel-	3	11	14	0.909787	ns
b1112	Zm00001d047448	9	130415702	130418514	-	9:130418941-130419547	9:134408143-134408145	B73	427	9:130418743-130418941	9:130419547-130419748	606	595	0.981848	TE-InDel	DNA/PIF-Harbinger	GRMZM2G329144	32.1394	3.96576	0.577105	B73	indel+	6	10	16	0.753666	ns
b1113	Zm00001d047479	9	131494599	131498207	-	9:131498642-131499021	9:135755714-135755820	B73	435	9:131498443-131498642	9:131499021-131499222	379	379	1	TE-InDel	DNA/hAT	GRMZM2G058522	47.4175	25.6121	0.77975	B73	indel+	4	11	15	0.0571125	ns
b1115	Zm00001d047562	9	135605511	135608671	-	9:135610798-135610963	9:139111649-139111653	B73	2127	9:135610600-135610798	9:135610963-135611163	165	0	0	none-TE-InDel		GRMZM2G022398	24.8567	0.509069	0.547087	B73	indel+	7	9	16	0.424307	ns
b1116	Zm00001d047562	9	135605511	135608671	-	9:135612253-135613520	9:139112940-139112942	B73	3582	9:135612054-135612253	9:135613520-135613700	1267	1264	0.997632	TE-InDel	DNA/EnSpm/CACTA	GRMZM2G022398	24.8567	0.509069	0.547087	B73	indel+	7	9	16	0.391795	ns
b1117	Zm00001d047632	9	137491058	137497818	-	9:137501203-137501204	9:140843434-140843765	Mo17	3386	9:137501003-137501204	9:137501203-137501400	331	331	1	TE-InDel	DNA/Mariner	GRMZM2G092174	27.9475	-1.21996	0.623915	MO17	indel+	1	11	12
b1118	Zm00001d047635	9	137667495	137670992	-	9:137671119-137671120	9:141068703-141069063	Mo17	128	9:137670921-137671120	9:137671119-137671317	360	148	0.411111	TE-InDel	DNA/PIF-Harbinger	GRMZM2G121303	22.0242	3.75997	0.537685	B73	indel-	5	10	15	0.0205893	significant	indel+	inconsistent
b1119	Zm00001d047637	9	137801731	137804561	-	9:137804592-137804595	9:141127436-141131062	Mo17	34	9:137804396-137804595	9:137804592-137804794	3626	551	0.151958	TE-InDel	DNA/Helitron	AC233955.1_FG009	60.8148	1.72214	0.855192	B73	indel-	1	11	12
b1120	Zm00001d047723	9	140000414	140003136	-	9:140007057-140007108	9:143454957-143455126	Mo17	3921	9:140006858-140007057	9:140007108-140007307	169	0	0	none-TE-InDel		AC206223.3_FG001	23.7967	1.83042	0.591597	B73	indel-	7	7	14	2.72244e-05	significant	indel+	inconsistent
b1121	Zm00001d047820	9	142587964	142588263	+	9:142584808-142586030	9:145845409-145845417	B73	1934	9:142584609-142584808	9:142586030-142586229	1222	1222	1	TE-InDel	DNA/MuDR	GRMZM2G103595	31.4993	2.44745	0.702478	B73	indel+	6	10	16	0.0415026	significant	indel+	consistent
b1122	Zm00001d047820	9	142587964	142588263	+	9:142587177-142587179	9:145847147-145847490	Mo17	787	9:142586977-142587179	9:142587177-142587330	343	278	0.810496	TE-InDel	DNA/PIF-Harbinger	GRMZM2G103595	31.4993	2.44745	0.702478	B73	indel-	5	7	12	0.00803722	significant	indel-	consistent	yes	3.83827	0.0531903
b1123	Zm00001d047840	9	143017079	143020101	-	9:143021523-143021719	9:146444704-146444710	B73	1422	9:143021329-143021523	9:143021719-143021918	196	0	0	none-TE-InDel		GRMZM2G179329	55.2743	1.1318	0.873745	B73	indel+	6	10	16	0.201332	ns
b1124	Zm00001d047840	9	143017079	143020101	-	9:143022361-143022423	9:146445358-146445923	Mo17	2260	9:143022163-143022361	9:143022423-143022623	565	528	0.934513	TE-InDel	DNA/hAT	GRMZM2G179329	55.2743	1.1318	0.873745	B73	indel-	8	5	13	0.214231	ns
b1126	Zm00001d047912	9	145083002	145087759	-	9:145090695-145091089	9:148447260-148447261	B73	2936	9:145090506-145090695	9:145091089-145091271	394	226	0.573604	TE-InDel	DNA/PIF-Harbinger	GRMZM2G101001	51.7777	5.72129	0.785473	B73	indel+	3	13	16	0.409634	ns
b1127	Zm00001d047912	9	145083002	145087759	-	9:145091271-145091734	9:148447414-148447423	B73	3512	9:145091089-145091271	9:145091734-145091933	463	279	0.602592	TE-InDel	DNA/MuDR	GRMZM2G101001	51.7777	5.72129	0.785473	B73	indel+	3	13	16	0.409634	ns
b1128	Zm00001d047969	9	146642718	146646417	-	9:146647104-146647106	9:149796875-149796993	Mo17	689	9:146646904-146647106	9:146647104-146647304	118	118	1	TE-InDel	DNA/Helitron	GRMZM2G165426	41.3883	1.70963	0.759876	B73	indel-	0	6	6
b1129	Zm00001d047994	9	147444229	147452322	+	9:147442452-147442814	9:150666520-150666524	B73	1415	9:147442253-147442452	9:147442814-147443003	362	221	0.610497	TE-InDel	DNA/Helitron	GRMZM2G167957	40.0186	3.83334	0.712046	B73	indel+	14	2	16	0.386554	ns
b1130	Zm00001d048041	9	148611010	148615970	-	9:148616192-148617173	9:152621890-152621898	B73	222	9:148615993-148616192	9:148617173-148617283	981	909	0.926606	TE-InDel	DNA/hAT	GRMZM2G026742	40.9858	0.539747	0.804811	B73	indel+	3	13	16	0.0469481	significant	indel+	consistent
b1131	Zm00001d048041	9	148611010	148615970	-	9:148617283-148617639	9:152621998-152622006	B73	1313	9:148617173-148617283	9:148617639-148617749	356	356	1	TE-InDel	DNA/hAT	GRMZM2G026742	40.9858	0.539747	0.804811	B73	indel+	4	12	16	0.012061	significant	indel+	consistent
b1132	Zm00001d048041	9	148611010	148615970	-	9:148617749-148617756	9:152622108-152622649	Mo17	1779	9:148617639-148617749	9:148617756-148617954	541	397	0.733826	TE-InDel	DNA/hAT	GRMZM2G026742	40.9858	0.539747	0.804811	B73	indel-	8	4	12	0.0241041	significant	indel-	consistent
b1133	Zm00001d048041	9	148611010	148615970	-	9:148618416-148620256	9:152623314-152623439	B73	2446	9:148618218-148618416	9:148620256-148620455	1840	980	0.532609	TE-InDel	LTR/Gypsy	GRMZM2G026742	40.9858	0.539747	0.804811	B73	indel+	4	12	16	0.00951817	significant	indel+	consistent
b1134	Zm00001d048085	9	149821917	149824839	+	9:149819414-149819573	9:154021852-154021856	B73	2344	9:149819209-149819414	9:149819573-149819772	159	0	0	none-TE-InDel		AC197717.3_FG002	38.3503	2.96414	0.717449	B73	indel+	11	5	16	0.135873	ns
b1135	Zm00001d048090	9	149906120	149911347	-	9:149911525-149911733	9:154127678-154127680	B73	178	9:149911326-149911525	9:149911733-149911933	208	113	0.543269	TE-InDel	DNA/MuDR	GRMZM2G386998	53.0188	-2.40423	0.724321	MO17	indel-	10	6	16	0.565346	ns
b1137	Zm00001d048108	9	150346816	150354942	+	9:150344806-150344812	9:154679443-154681556	Mo17	2004	9:150344613-150344806	9:150344812-150344992	2113	1570	0.743019	TE-InDel	DNA/PIF-Harbinger	GRMZM2G113506	25.4564	1.75397	0.53859	B73	indel-	2	6	8	0.625935	ns
b1140	Zm00001d048215	9	152594876	152596298	+	9:152591776-152591777	9:157093264-157093372	Mo17	3100	9:152591584-152591777	9:152591776-152591975	108	0	0	none-TE-InDel		GRMZM2G091226	55.927	1.76476	0.831973	B73	indel-	4	7	11	0.0773612	ns
b1141	Zm00001d048215	9	152594876	152596298	+	9:152593194-152593206	9:157094802-157095392	Mo17	1670	9:152592995-152593194	9:152593206-152593395	590	579	0.981356	TE-InDel	Simple_repeat	GRMZM2G091226	55.927	1.76476	0.831973	B73	indel-	3	11	14	0.248318	ns
b1143	Zm00001d048301	9	154161995	154167015	-	9:154167434-154167442	9:158831431-158831665	Mo17	427	9:154167244-154167442	9:154167434-154167634	234	223	0.952991	TE-InDel	DNA	GRMZM2G141084	43.1886	3.71678	0.695293	B73	indel-	1	12	13
b1144	Zm00001d048308	9	154292378	154297178	-	9:154300424-154301868	9:159049347-159049351	B73	3246	9:154300264-154300424	9:154301868-154302066	1444	1443	0.999307	TE-InDel	LTR/Copia	AC149829.2_FG003	36.8466	2.32357	0.663898	B73	indel+	11	5	16	0.884726	ns
b1145	Zm00001d048315	9	154450335	154453803	-	9:154453980-154455209	9:159295184-159295185	B73	177	9:154453781-154453980	9:154455209-154455404	1229	552	0.449146	TE-InDel	DNA/hAT	GRMZM2G178826	44.9672	4.99106	0.792366	B73	indel+	13	3	16	0.48139	ns
b1146	Zm00001d048315	9	154450335	154453803	-	9:154455452-154455718	9:159295434-159295435	B73	1649	9:154455260-154455452	9:154455718-154455918	266	253	0.951128	TE-InDel	NonLTR/L1	GRMZM2G178826	44.9672	4.99106	0.792366	B73	indel+	12	4	16	0.464524	ns
b1147	Zm00001d048356	9	154883684	154884796	+	9:154883299-154883327	9:159876406-159876939	Mo17	357	9:154883100-154883299	9:154883327-154883519	533	387	0.726079	TE-InDel	DNA/hAT	GRMZM2G126682	41.0111	-8.12619	0.835669	MO17	indel+	12	4	16	0.178824	ns
b1148	Zm00001d048397	9	155585504	155588310	-	9:155592346-155592472	9:160602087-160602090	B73	4036	9:155592147-155592346	9:155592472-155592670	126	126	1	TE-InDel	DNA	AC149818.2_FG006	21.3731	1.97668	0.503601	B73	indel+	8	8	16	0.971152	ns
b1149	Zm00001d048410	9	155786126	155792966	-	9:155794865-155794875	9:160917426-160918190	Mo17	1899	9:155794666-155794865	9:155794875-155795074	764	764	1	TE-InDel	LTR/Copia	GRMZM2G362088	33.0283	2.7586	0.670476	B73	indel-	6	3	9	0.897926	ns
b1150	Zm00001d048467	9	156831903	156836049	-	9:156836329-156836518	9:162006412-162006467	B73	280	9:156836132-156836329	9:156836518-156836720	189	121	0.640212	TE-InDel	DNA	GRMZM2G317938	56.7095	3.76077	0.749577	B73	indel+	10	6	16	0.926811	ns
b1151	Zm00001d048467	9	156831903	156836049	-	9:156836882-156836885	9:162006829-162007151	Mo17	836	9:156836692-156836885	9:156836882-156837082	322	243	0.754658	TE-InDel	NonLTR/L1	GRMZM2G317938	56.7095	3.76077	0.749577	B73	indel-	1	7	8
b1152	Zm00001d048472	9	156918352	156922586	-	9:156922782-156922980	9:162077297-162077314	B73	196	9:156922583-156922782	9:156922980-156923179	198	141	0.712121	TE-InDel	DNA/Helitron	GRMZM2G064005	26.8424	0.762615	0.534599	B73	indel+	13	3	16	0.616281	ns
b1154	Zm00001d048496	9	157234264	157237375	+	9:157229866-157231115	9:162407461-162407471	B73	3149	9:157229667-157229866	9:157231115-157231298	1249	761	0.609287	TE-InDel	DNA/EnSpm/CACTA	GRMZM2G143244	39.5025	2.41705	0.764129	B73	indel+	4	12	16	0.0923582	ns
b1155	Zm00001d048496	9	157234264	157237375	+	9:157231298-157231500	9:162407641-162407666	B73	2764	9:157231115-157231298	9:157231500-157231699	202	46	0.227723	TE-InDel	Simple_repeat	GRMZM2G143244	39.5025	2.41705	0.764129	B73	indel+	4	12	16	0.019197	significant	indel+	consistent
b1156	Zm00001d048550	9	158532306	158534244	-	9:158534291-158534492	9:163600282-163600285	B73	47	9:158534092-158534291	9:158534492-158534631	201	201	1	TE-InDel	DNA/PIF-Harbinger	GRMZM2G168281	37.2727	-1.52531	0.864149	MO17	indel-	9	7	16	0.0532425	ns
b1158	Zm00001d023277	10	2014035	2017856	+	10:2013775-2013778	10:1847796-1847975	Mo17	260	10:2013576-2013778	10:2013775-2013964	179	117	0.653631	TE-InDel	DNA/Helitron	GRMZM2G151903	49.8338	3.98308	0.784473	B73	indel-	12	2	14	0.414151	ns
b1159	Zm00001d023376	10	4272268	4274843	-	10:4275154-4278245	10:4835375-4835387	B73	311	10:4274955-4275154	10:4278245-4278446	3091	1930	0.624393	TE-InDel	DNA/Helitron	GRMZM2G003762	26.1898	-12.3869	0.521728	MO17	indel-	4	11	15	0.718813	ns
b1160	Zm00001d023376	10	4272268	4274843	-	10:4279000-4279177	10:4836128-4836131	B73	4157	10:4278798-4279000	10:4279177-4279376	177	177	1	TE-InDel	LTR/Copia	GRMZM2G003762	26.1898	-12.3869	0.521728	MO17	indel-	6	10	16	0.606444	ns
b1161	Zm00001d023378	10	4288877	4292640	+	10:4288454-4288711	10:4863366-4863425	B73	166	10:4288326-4288454	10:4288711-4288844	257	206	0.801556	TE-InDel	DNA/TcMar-Stowaway	GRMZM2G004445	30.1898	-0.651613	0.595297	MO17	indel-	5	9	14	0.108358	ns
b1162	Zm00001d023378	10	4288877	4292640	+	10:4288842-4288844	10:4863558-4863916	Mo17	35	10:4288711-4288844	10:4288842-4289041	358	207	0.578212	TE-InDel	DNA/PIF-Harbinger	GRMZM2G004445	30.1898	-0.651613	0.595297	MO17	indel+	4	9	13	0.132177	ns
b1163	Zm00001d023379	10	4293119	4298209	-	10:4298259-4298568	10:4874471-4874484	B73	50	10:4298060-4298259	10:4298568-4298745	309	258	0.834951	TE-InDel	NonLTR/SINE	GRMZM2G004534	18.4817	-4.22039	0.497431	MO17	indel-	9	7	16	0.0567216	ns
b1164	Zm00001d023450	10	5902065	5906458	-	10:5906558-5906579	10:6413412-6414590	Mo17	100	10:5906366-5906558	10:5906579-5906759	1178	1165	0.988964	TE-InDel	DNA/Helitron	AC207755.3_FG005	23.6771	0.364142	0.614337	B73	indel-	3	7	10	0.955455	ns
b1167	Zm00001d023604	10	11808463	11810324	-	10:11810598-11810656	10:11762117-11762382	Mo17	274	10:11810399-11810598	10:11810656-11810799	265	215	0.811321	TE-InDel	DNA/MuDR	GRMZM2G122053	26.8933	2.39666	0.505395	B73	indel-	2	14	16
b1168	Zm00001d023651	10	13646858	13651222	+	10:13644362-13644567	10:13291120-13291123	B73	2291	10:13644163-13644362	10:13644567-13644767	205	0	0	none-TE-InDel		GRMZM5G838435	33.4989	0.625788	0.667101	B73	indel+	7	9	16	0.931836	ns
b1169	Zm00001d023651	10	13646858	13651222	+	10:13644877-13645645	10:13291415-13291420	B73	1213	10:13644678-13644877	10:13645645-13645846	768	768	1	TE-InDel	DNA/PIF-Harbinger	GRMZM5G838435	33.4989	0.625788	0.667101	B73	indel+	3	13	16	0.611557	ns
b1170	Zm00001d023651	10	13646858	13651222	+	10:13646021-13646086	10:13291793-13292158	Mo17	772	10:13645828-13646021	10:13646086-13646275	365	177	0.484932	TE-InDel	DNA	GRMZM5G838435	33.4989	0.625788	0.667101	B73	indel-	9	4	13	0.623369	ns
b1171	Zm00001d023707	10	16408714	16409698	-	10:16410178-16410178	10:15685509-15685725	Mo17	480	10:16409979-16410178	10:16410178-16410370	216	201	0.930556	TE-InDel	ERV/ERV2	GRMZM2G181258	30.0104	1.05785	0.621146	B73	indel-	8	5	13	0.513373	ns
b1173	Zm00001d023733	10	17846675	17851927	-	10:17855725-17855743	10:17087917-17088184	Mo17	3798	10:17855529-17855725	10:17855743-17855931	267	156	0.58427	TE-InDel	DNA/Helitron	GRMZM2G009795	22.2299	2.72714	0.572673	B73	indel-	7	8	15	0.805275	ns
b1174	Zm00001d023753	10	18679071	18679802	-	10:18681481-18684431	10:18021829-18021898	B73	1679	10:18681282-18681481	10:18684431-18684595	2950	293	0.099322	TE-InDel	DNA/PIF-Harbinger	GRMZM2G319262	31.8109	0.639789	0.674914	B73	indel+	3	13	16	0.0104317	significant	indel+	consistent
b1175	Zm00001d023912	10	27881681	27885933	+	10:27881358-27881529	10:26329369-26329372	B73	152	10:27881160-27881358	10:27881529-27881730	171	90	0.526316	TE-InDel	Simple_repeat	GRMZM2G171006	76.0764	4.42729	0.918168	B73	indel+	11	5	16	0.00561152	significant	indel+	consistent
b1176	Zm00001d023987	10	34453878	34465900	-	10:34468730-34468733	10:33320659-33320860	Mo17	2833	10:34468534-34468733	10:34468730-34468930	201	201	1	TE-InDel	DNA	GRMZM2G171518	25.7501	-14.1182	0.518191	MO17	indel+	5	4	9	0.0940922	ns
b1177	Zm00001d024222	10	58034393	58036920	+	10:58034167-58034168	10:56185738-56186070	Mo17	226	10:58034001-58034168	10:58034167-58034367	332	222	0.668675	TE-InDel	DNA	GRMZM2G126471	29.3758	-1.49398	0.659172	MO17	indel+	1	8	9
b1178	Zm00001d024268	10	60226179	60228837	+	10:60224465-60224467	10:59938020-59938158	Mo17	1714	10:60224265-60224467	10:60224465-60224659	138	138	1	TE-InDel	LTR/Copia	GRMZM2G167018	37.7488	0.288727	0.661938	B73	indel-	7	8	15	0.0108205	significant	indel-	consistent
b1179	Zm00001d024268	10	60226179	60228837	+	10:60225209-60226081	10:59938894-59938894	B73	98	10:60225010-60225209	10:60226081-60226276	872	358	0.41055	TE-InDel	DNA/PIF-Harbinger	GRMZM2G167018	37.7488	0.288727	0.661938	B73	indel+	7	9	16	0.00024615	significant	indel+	consistent
b1180	Zm00001d024416	10	70055995	70057908	-	10:70059666-70059668	10:69489524-69489750	Mo17	1760	10:70059473-70059668	10:70059666-70059866	226	224	0.99115	TE-InDel	DNA/MuDR	GRMZM2G049641	19.2949	-1.24108	0.496846	MO17	indel+	4	12	16	0.246194	ns
b1181	Zm00001d024418	10	70186132	70189912	-	10:70190014-70190014	10:69625368-69628239	Mo17	102	10:70189815-70190014	10:70190014-70190143	2871	2219	0.772901	TE-InDel	DNA/Helitron	GRMZM2G112782	56.569	2.38931	0.870743	B73	indel-	4	11	15	0.0344258	significant	indel-	consistent
b1182	Zm00001d024467	10	72225291	72228591	+	10:72224956-72224965	10:72206375-72206778	Mo17	335	10:72224769-72224965	10:72224956-72225121	403	401	0.995037	TE-InDel	DNA/hAT	GRMZM2G022506	44.3335	0.940642	0.824873	B73	indel-	4	8	12	0.0464723	significant	indel-	consistent
b1183	Zm00001d024512	10	75069687	75075183	-	10:75076894-75077019	10:73999988-73999992	B73	1711	10:75076695-75076894	10:75077019-75077219	125	124	0.992	TE-InDel	DNA	GRMZM2G068808	60.15	1.7545	0.864603	B73	indel+	7	9	16	0.977114	ns
b1184	Zm00001d024600	10	79991194	79997385	-	10:79998509-79998525	10:78923249-78923375	Mo17	1124	10:79998310-79998509	10:79998525-79998713	126	126	1	TE-InDel	ERV/ERV1	GRMZM2G333183	46.4748	0.408602	0.836716	B73	indel-	10	5	15	0.819095	ns
b1185	Zm00001d024600	10	79991194	79997385	-	10:79999276-79999423	10:78924128-78924137	B73	1891	10:79999081-79999276	10:79999423-79999614	147	130	0.884354	TE-InDel	DNA/PIF-Harbinger	GRMZM2G333183	46.4748	0.408602	0.836716	B73	indel+	6	10	16	0.876271	ns
b1186	Zm00001d024600	10	79991194	79997385	-	10:79999688-79999689	10:78924424-78924580	Mo17	2303	10:79999510-79999688	10:79999689-79999888	156	84	0.538462	TE-InDel	DNA/TcMar-Stowaway	GRMZM2G333183	46.4748	0.408602	0.836716	B73	indel-	9	5	14	0.74527	ns
b1187	Zm00001d024675	10	83281590	83288964	+	10:83281431-83281510	10:82115302-82116635	Mo17	80	10:83281234-83281431	10:83281510-83281706	1333	496	0.372093	TE-InDel	DNA/PIF-Harbinger	GRMZM2G003897	33.6482	13.774	0.663588	B73	indel-	4	3	7	0.161028	ns
b1188	Zm00001d024729	10	85508260	85512046	-	10:85512862-85513034	10:83956542-83956550	B73	816	10:85512663-85512862	10:85513034-85513240	172	172	1	TE-InDel	DNA/PIF-Harbinger	GRMZM2G155836	49.4036	3.06804	0.770254	B73	indel+	4	12	16	0.944557	ns
b1191	Zm00001d025010	10	99533913	99544932	-	10:99546054-99546057	10:97883144-97883532	Mo17	1125	10:99545859-99546057	10:99546054-99546251	388	156	0.402062	TE-InDel	DNA/PIF-Harbinger	GRMZM2G143725	26.6453	2.32424	0.563064	B73	indel-	6	7	13	0.0511402	ns
b1192	Zm00001d025247	10	110941782	110942219	+	10:110940370-110940464	10:109494566-109494797	Mo17	1318	10:110940171-110940370	10:110940464-110940571	231	120	0.519481	TE-InDel	DNA	GRMZM2G034206	26.9823	3.13446	0.54738	B73	indel-	1	14	15
b1193	Zm00001d025247	10	110941782	110942219	+	10:110941371-110941379	10:109495613-109496060	Mo17	411	10:110941226-110941379	10:110941371-110941571	447	444	0.993289	TE-InDel	DNA/hAT	GRMZM2G034206	26.9823	3.13446	0.54738	B73	indel-	2	14	16	0.746027	ns
b1194	Zm00001d025338	10	114698888	114700369	-	10:114701110-114701561	10:112720869-112720946	B73	741	10:114700913-114701110	10:114701561-114701755	451	324	0.718404	TE-InDel	DNA	GRMZM2G147390	24.4384	-0.465753	0.523371	MO17	indel-	5	10	15	0.332684	ns
b1195	Zm00001d025338	10	114698888	114700369	-	10:114704351-114704372	10:112723623-112724684	Mo17	3982	10:114704160-114704351	10:114704372-114704512	1061	761	0.717248	TE-InDel	NonLTR/Daphne	GRMZM2G147390	24.4384	-0.465753	0.523371	MO17	indel+	1	7	8
b1196	Zm00001d025538	10	121718740	121726333	+	10:121714504-121715229	10:119641967-119641969	B73	3511	10:121714308-121714504	10:121715229-121715425	725	390	0.537931	TE-InDel	LTR/Gypsy	GRMZM2G097499	24.2456	0.665232	0.543157	B73	indel+	3	13	16	0.47243	ns
b1197	Zm00001d025720	10	127515419	127518791	+	10:127515290-127515291	10:125871044-125871207	Mo17	129	10:127515169-127515291	10:127515290-127515490	163	41	0.251534	TE-InDel	DNA	GRMZM2G047370	41.9798	1.90315	0.788877	B73	indel-	5	5	10	0.0785513	ns
b1198	Zm00001d025777	10	129239384	129245248	-	10:129245497-129245506	10:127948764-127949057	Mo17	258	10:129245307-129245506	10:129245497-129245697	293	293	1	TE-InDel	DNA/PIF-Harbinger	GRMZM2G098577	25.4134	-3.64867	0.570053	MO17	indel+	1	15	16
b1199	Zm00001d025834	10	131395394	131399206	-	10:131399246-131399548	10:130475254-130475260	B73	40	10:131399047-131399246	10:131399548-131399669	302	301	0.996689	TE-InDel	DNA/PIF-Harbinger	GRMZM2G160069	38.4867	0.801718	0.692199	B73	indel+	5	11	16	0.947342	ns
b1200	Zm00001d025834	10	131395394	131399206	-	10:131399665-131399669	10:130475375-130475502	Mo17	463	10:131399548-131399669	10:131399665-131399865	127	127	1	TE-InDel	DNA/PIF-Harbinger	GRMZM2G160069	38.4867	0.801718	0.692199	B73	indel-	7	7	14	0.211148	ns
b1203	Zm00001d025893	10	133218764	133222199	-	10:133223917-133224756	10:131894007-131894015	B73	1718	10:133223718-133223917	10:133224756-133224956	839	839	1	TE-InDel	DNA/hAT	GRMZM2G164714	39.7131	5.64883	0.69768	B73	indel+	4	12	16	0.247942	ns
b1204	Zm00001d025951	10	134563080	134575911	-	10:134577203-134577267	10:133193611-133194790	Mo17	1292	10:134577004-134577203	10:134577267-134577461	1179	923	0.782867	TE-InDel	DNA/hAT	GRMZM2G054418	40.2305	3.67106	0.813099	B73	indel-	6	7	13	0.325872	ns
b1206	Zm00001d025966	10	134986888	134991306	+	10:134984615-134984723	10:133545434-133545437	B73	2165	10:134984445-134984615	10:134984723-134984924	108	66	0.611111	TE-InDel	DNA/PIF-Harbinger	GRMZM2G429237	56.3091	2.1661	0.83783	B73	indel+	3	13	16	0.304543	ns
b1207	Zm00001d025991	10	135568286	135572664	-	10:135573118-135573238	10:134140965-134140967	B73	454	10:135572919-135573118	10:135573238-135573434	120	119	0.991667	TE-InDel	DNA/PIF-Harbinger	GRMZM2G027173	39.0274	2.36681	0.744235	B73	indel+	11	5	16	0.875099	ns
b1210	Zm00001d026004	10	135832420	135834891	+	10:135831028-135831031	10:134532060-134534057	Mo17	1392	10:135830832-135831031	10:135831028-135831167	1997	1747	0.874812	TE-InDel	DNA/EnSpm/CACTA	GRMZM2G322582	29.8547	-0.122512	0.670666	MO17	indel+	11	2	13	0.649149	ns
b1211	Zm00001d026004	10	135832420	135834891	+	10:135832377-135832391	10:134534853-134536467	Mo17	29	10:135832189-135832377	10:135832391-135832578	1614	1053	0.652416	TE-InDel	DNA/hAT	GRMZM2G322582	29.8547	-0.122512	0.670666	MO17	indel+	12	2	14	0.664703	ns
b1212	Zm00001d026017	10	136073204	136075724	-	10:136076404-136076750	10:134806659-134806659	B73	680	10:136076232-136076404	10:136076750-136076951	346	316	0.913295	TE-InDel	DNA/PIF-Harbinger	GRMZM2G181030	30.9826	-0.169999	0.574078	MO17	indel-	8	8	16	0.092848	ns
b1213	Zm00001d026018	10	136174872	136179753	+	10:136173387-136174135	10:134851872-134851879	B73	737	10:136173257-136173387	10:136174135-136174341	748	707	0.945187	TE-InDel	DNA/hAT	GRMZM2G321239	30.4563	1.27785	0.619253	B73	indel+	2	14	16	0.974831	ns
b1214	Zm00001d026091	10	138160694	138165120	+	10:138157667-138157674	10:136823437-136823793	Mo17	3027	10:138157523-138157674	10:138157667-138157867	356	209	0.587079	TE-InDel	DNA/PIF-Harbinger	GRMZM5G856306	20.3204	0.863246	0.498552	B73	indel-	8	5	13	0.0412211	significant	indel+	inconsistent
b1215	Zm00001d026131	10	139320952	139323275	+	10:139318437-139318444	10:137750951-137751276	Mo17	2508	10:139318242-139318437	10:139318444-139318634	325	311	0.956923	TE-InDel	DNA/PIF-Harbinger	GRMZM2G360519	25.7115	0.759402	0.611077	B73	indel-	4	5	9	0.365276	ns
b1216	Zm00001d026131	10	139320952	139323275	+	10:139320680-139320903	10:137753199-137753201	B73	49	10:139320481-139320680	10:139320903-139321103	223	0	0	none-TE-InDel		GRMZM2G360519	25.7115	0.759402	0.611077	B73	indel+	10	6	16	0.219175	ns
b1217	Zm00001d026261	10	142291677	142296479	-	10:142296542-142296545	10:140690797-140691846	Mo17	63	10:142296351-142296542	10:142296545-142296675	1049	657	0.626311	TE-InDel	DNA/PIF-Harbinger	GRMZM2G057567	40.4712	-0.546205	0.747328	MO17	indel+	2	12	14	0.0094696	significant	indel+	consistent	yes	10.3328	0.00178593
b1218	Zm00001d026278	10	142737422	142739168	+	10:142737231-142737327	10:141036894-141037407	Mo17	95	10:142737080-142737231	10:142737327-142737533	513	85	0.165692	TE-InDel	LTR/Gypsy	GRMZM2G031586	24.2507	-13.6729	0.52584	MO17	indel+	4	7	11	0.00710497	significant	indel-	inconsistent
b1219	Zm00001d026284	10	142767423	142768557	+	10:142763094-142763435	10:141072267-141072267	B73	3988	10:142762895-142763094	10:142763435-142763636	341	330	0.967742	TE-InDel	DNA/PIF-Harbinger	GRMZM2G028676	21.1117	-1.47072	0.505797	MO17	indel-	5	11	16	0.717661	ns
b1220	Zm00001d026351	10	144099075	144105329	-	10:144107042-144107044	10:142276074-142276468	Mo17	1715	10:144106842-144107044	10:144107042-144107227	394	393	0.997462	TE-InDel	DNA/PIF-Harbinger	GRMZM2G122897	26.9564	3.1024	0.511214	B73	indel-	4	10	14	0.610776	ns
b1221	Zm00001d026351	10	144099075	144105329	-	10:144107358-144107360	10:142276800-142277097	Mo17	2029	10:144107163-144107358	10:144107360-144107554	297	287	0.96633	TE-InDel	DNA/PIF-Harbinger	GRMZM2G122897	26.9564	3.1024	0.511214	B73	indel-	5	8	13	0.797979	ns
b1222	Zm00001d026367	10	144422318	144422683	-	10:144423451-144423765	10:142596129-142596132	B73	768	10:144423267-144423451	10:144423765-144423963	314	314	1	TE-InDel	DNA/PIF-Harbinger	GRMZM2G324767	29.7662	0.587492	0.627912	B73	indel+	3	13	16	0.0321673	significant	indel+	consistent
b1223	Zm00001d026367	10	144422318	144422683	-	10:144424133-144424286	10:142596524-142596525	B73	1450	10:144423985-144424133	10:144424286-144424481	153	153	1	TE-InDel	Interspersed_Repeat	GRMZM2G324767	29.7662	0.587492	0.627912	B73	indel+	4	12	16	0.0728741	ns
b1224	Zm00001d026440	10	145898798	145899433	-	10:145899972-145899972	10:144212380-144212618	Mo17	539	10:145899791-145899972	10:145899972-145900173	238	113	0.47479	TE-InDel	DNA	GRMZM2G064903	22.9141	0.359758	0.553774	B73	indel-	4	9	13	0.92433	ns
b1225	Zm00001d026447	10	145983350	145983982	-	10:145986175-145986366	10:144260492-144260496	B73	2193	10:145985979-145986175	10:145986366-145986474	191	129	0.675393	TE-InDel	DNA/MuDR	GRMZM2G421033	31.1802	0.819186	0.604494	B73	indel+	5	11	16	0.0809207	ns
b1226	Zm00001d026448	10	146059085	146062110	+	10:146058596-146058656	10:144300079-144300268	Mo17	429	10:146058397-146058596	10:146058656-146058797	189	0	0	none-TE-InDel		GRMZM2G076602	28.736	0.973356	0.516705	B73	indel-	6	8	14	0.134924	ns
b1227	Zm00001d026531	10	147769191	147773447	-	10:147775481-147775607	10:145866091-145866094	B73	2034	10:147775282-147775481	10:147775607-147775796	126	0	0	none-TE-InDel		GRMZM2G106376	48.8447	1.27012	0.81373	B73	indel+	10	6	16	0.384711	ns
b1228	Zm00001d026532	10	147796659	147804756	+	10:147795988-147796270	10:145867541-145867543	B73	389	10:147795789-147795988	10:147796270-147796469	282	144	0.510638	TE-InDel	DNA/PIF-Harbinger	GRMZM5G866734	48.6904	9.31546	0.823605	B73	indel+	8	8	16	0.0934751	ns
b1229	Zm00001d026541	10	147936532	147941050	+	10:147934958-147935136	10:146003185-146003197	B73	1396	10:147934759-147934958	10:147935136-147935261	178	0	0	none-TE-InDel		GRMZM2G124502	38.3485	1.07373	0.728463	B73	indel+	10	6	16	0.97447	ns
b1230	Zm00001d026541	10	147936532	147941050	+	10:147935261-147935533	10:146003322-146003331	B73	999	10:147935136-147935261	10:147935533-147935724	272	238	0.875	TE-InDel	DNA/MuDR	GRMZM2G124502	38.3485	1.07373	0.728463	B73	indel+	7	9	16	0.859244	ns
b1231	Zm00001d026541	10	147936532	147941050	+	10:147936205-147936219	10:146004041-146004317	Mo17	327	10:147936021-147936219	10:147936205-147936405	276	0	0	none-TE-InDel		GRMZM2G124502	38.3485	1.07373	0.728463	B73	indel-	7	7	14	0.0713309	ns
b1232	Zm00001d026548	10	147989288	148003202	-	10:148003681-148003687	10:146106237-146106537	Mo17	479	10:148003482-148003681	10:148003687-148003882	300	0	0	none-TE-InDel		GRMZM2G423861	21.8449	-1.96691	0.552273	MO17	indel+	7	5	12	0.26744	ns
b1235	Zm00001d026549	10	148006440	148015145	-	10:148016461-148018116	10:146113338-146113341	B73	1316	10:148016264-148016461	10:148018116-148018314	1655	1080	0.652568	TE-InDel	DNA/PIF-Harbinger	GRMZM2G125083	47.1811	2.15145	0.7918	B73	indel+	4	12	16	0.816439	ns
b1236	Zm00001d026556	10	148051418	148057446	-	10:148057855-148058071	10:146165607-146165620	B73	409	10:148057656-148057855	10:148058071-148058273	216	216	1	TE-InDel	DNA/MuDR	GRMZM2G107557	34.7415	0.941568	0.674349	B73	indel+	12	4	16	0.369107	ns
b1237	Zm00001d026556	10	148051418	148057446	-	10:148059666-148059671	10:146167205-146167507	Mo17	2220	10:148059469-148059666	10:148059671-148059870	302	302	1	TE-InDel	DNA/PIF-Harbinger	GRMZM2G107557	34.7415	0.941568	0.674349	B73	indel-	5	6	11	0.0143945	significant	indel-	consistent
b1238	Zm00001d026556	10	148051418	148057446	-	10:148059997-148061196	10:146167830-146167833	B73	2551	10:148059798-148059997	10:148061196-148061397	1199	918	0.765638	TE-InDel	LTR/Copia	GRMZM2G107557	34.7415	0.941568	0.674349	B73	indel+	8	8	16	0.0567815	ns
b1239	Zm00001d026592	10	148633857	148636016	-	10:148636144-148636383	10:146606465-146606473	B73	128	10:148635945-148636144	10:148636383-148636582	239	238	0.995816	TE-InDel	DNA/MuDR	GRMZM2G052339	32.6816	0.496668	0.611033	B73	indel+	5	11	16	0.872396	ns
b1240	Zm00001d026592	10	148633857	148636016	-	10:148636859-148637476	10:146606925-146606931	B73	843	10:148636660-148636859	10:148637476-148637668	617	611	0.990276	TE-InDel	DNA/MuDR	GRMZM2G052339	32.6816	0.496668	0.611033	B73	indel+	10	6	16	0.718561	ns
b1241	Zm00001d026612	10	148925850	148932210	-	10:148932262-148932328	10:146901298-146901600	Mo17	52	10:148932063-148932262	10:148932328-148932527	302	156	0.516556	TE-InDel	LTR/Gypsy	GRMZM5G857930	23.3284	1.20479	0.540857	B73	indel-	3	12	15	0.0408265	significant	indel-	consistent
b1242	Zm00001d026655	10	149517376	149519238	+	10:149516735-149516735	10:147538806-147541812	Mo17	641	10:149516582-149516735	10:149516735-149516936	3006	556	0.184963	TE-InDel	DNA	GRMZM2G014043	21.1586	-0.464866	0.54568	MO17	indel+	4	11	15	0.000618723	significant	indel+	consistent
b1243	Zm00001d026655	10	149517376	149519238	+	10:149517065-149517187	10:147542142-147542544	Mo17	189	10:149516866-149517065	10:149517187-149517384	402	0	0	none-TE-InDel		GRMZM2G014043	21.1586	-0.464866	0.54568	MO17	indel+	5	6	11	0.00788079	significant	indel+	consistent	yes	1.80414	0.184445
b1244	Zm00001d026668	10	149652422	149656130	-	10:149657802-149657886	10:147624082-147624497	Mo17	1672	10:149657603-149657802	10:149657886-149658003	415	146	0.351807	TE-InDel	DNA/Helitron	GRMZM2G001934	35.9129	5.70737	0.750065	B73	indel-	6	7	13	0.945538	ns
b1245	Zm00001d026672	10	149707696	149709357	+	10:149705609-149705750	10:147708876-147708883	B73	1946	10:149705410-149705609	10:149705750-149705951	141	141	1	TE-InDel	NonLTR/L1	GRMZM2G177072	55.6258	1.39838	0.809848	B73	indel+	11	5	16	0.57881	ns
